# Supplementary material for: Gasdermin D mediates endoplasmic reticulum stress via FAM134B to regulate cardiomyocyte autophagy and apoptosis in doxorubicin-induced cardiotoxicity
Source: PubMed Central journal article supplement (PMC9606128; doi:10.1038/s41419-022-05333-3), 2022-10-26

# Figure 1

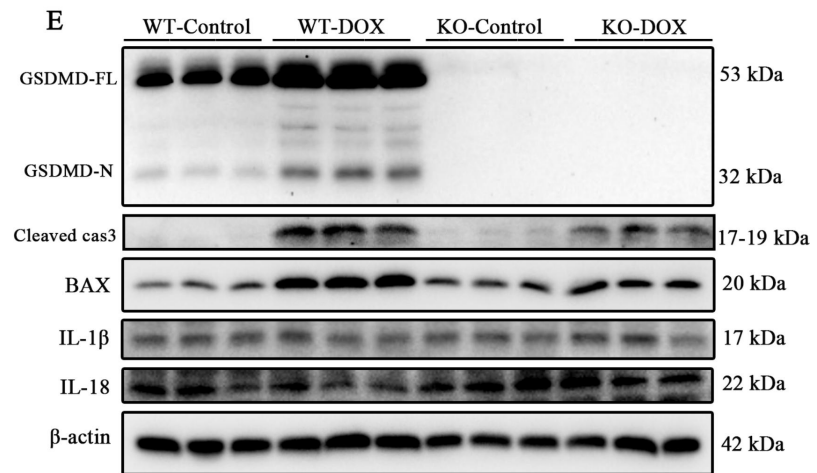

**GSDMD**

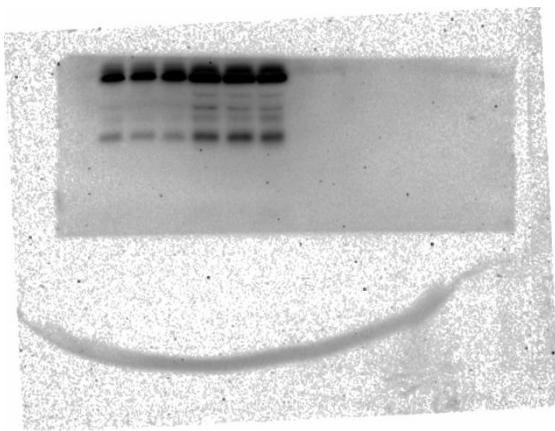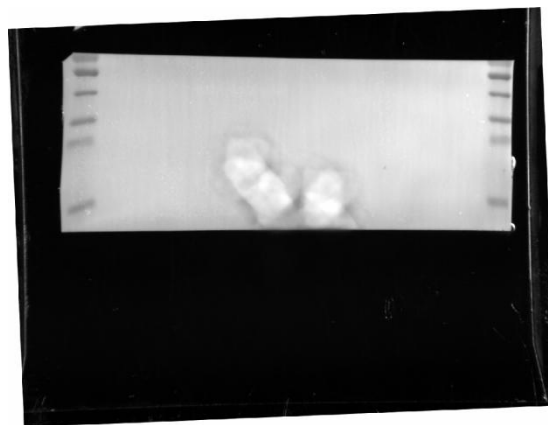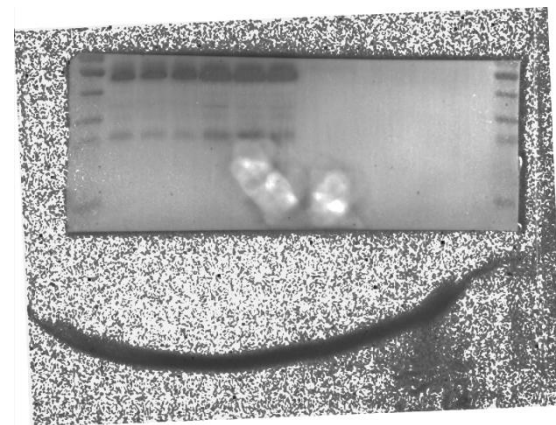

**BAX**

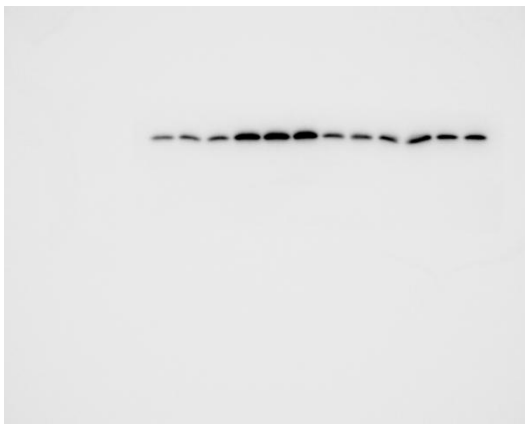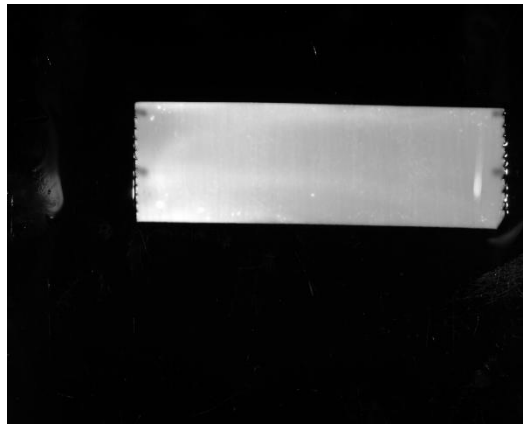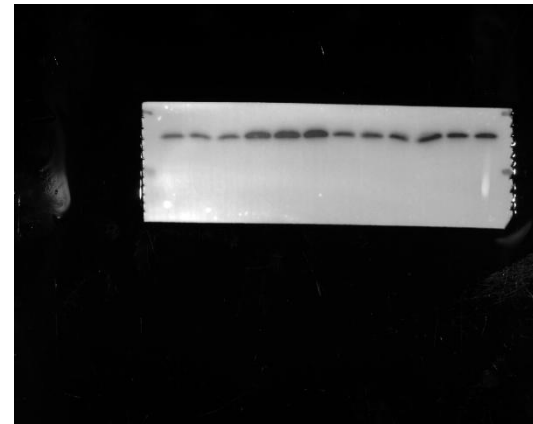

**Cleaved cas3**

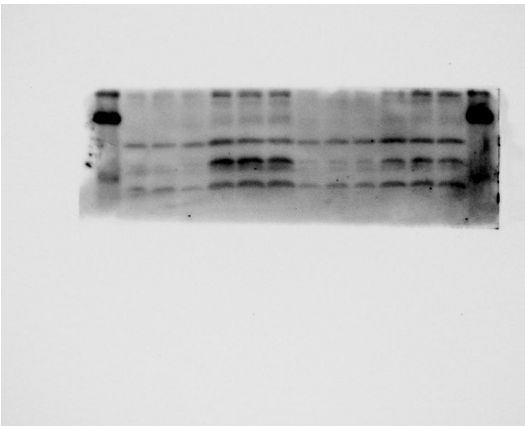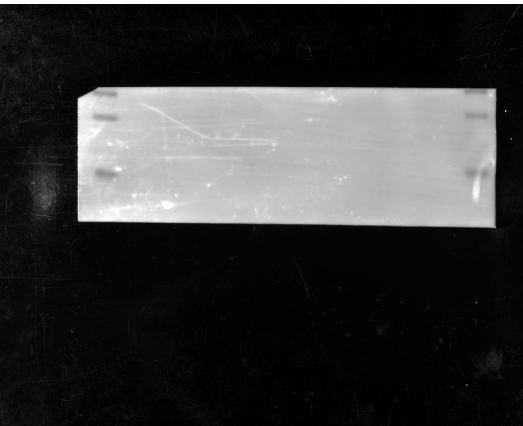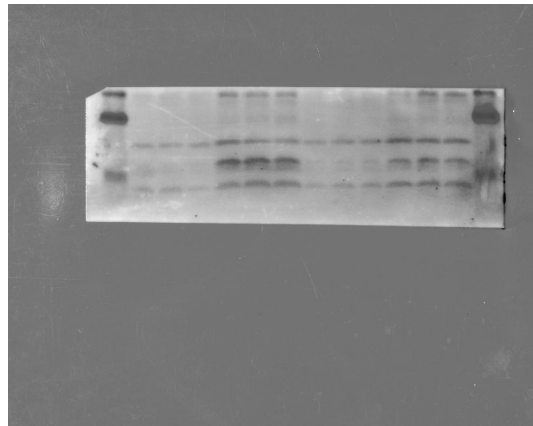

**IL-1 $\beta$**

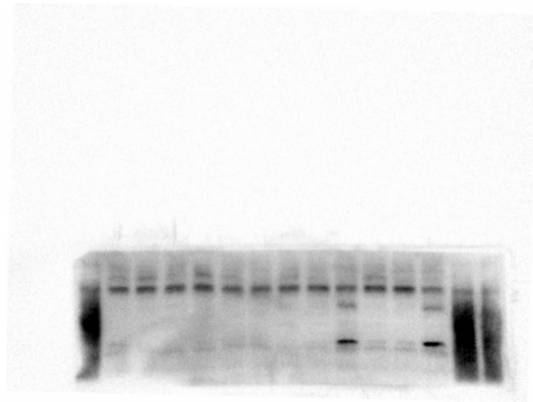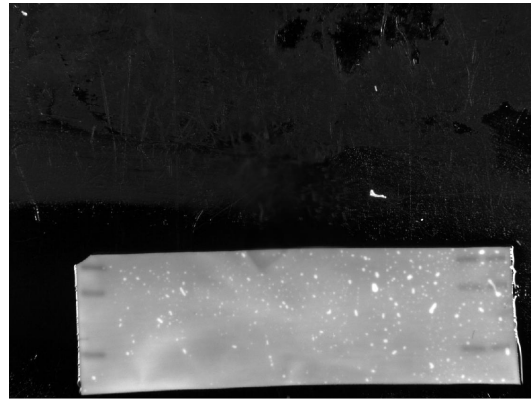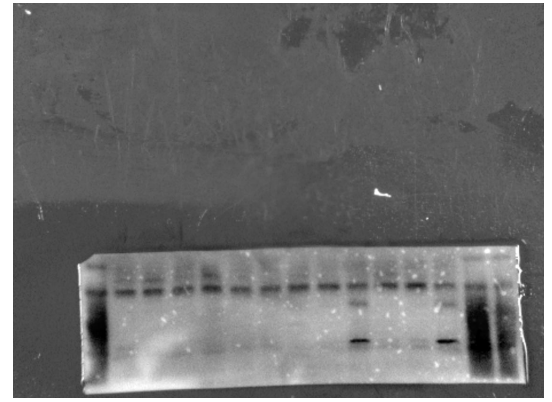

**IL-18**

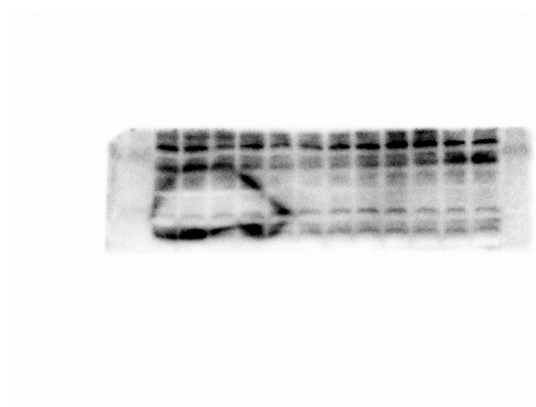

$\beta$ -actin

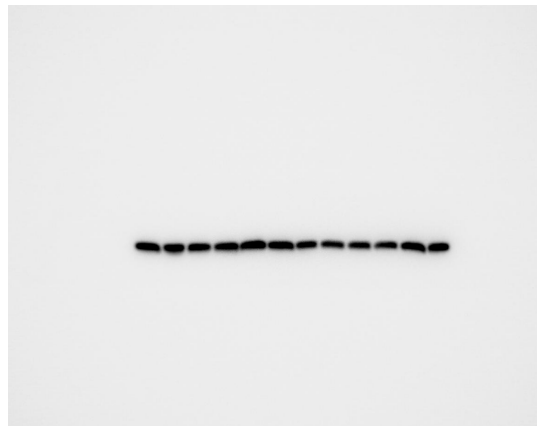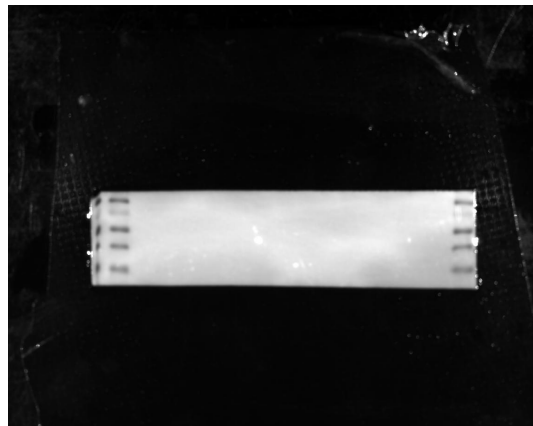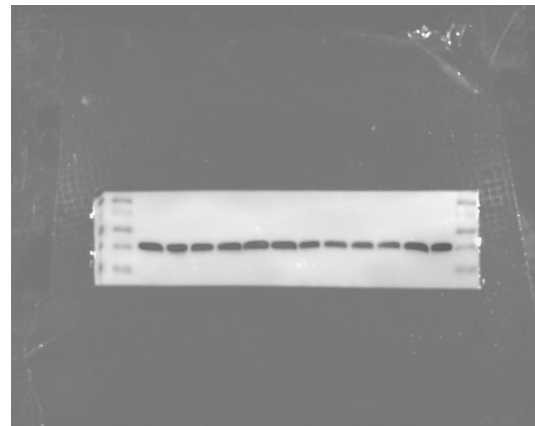

L

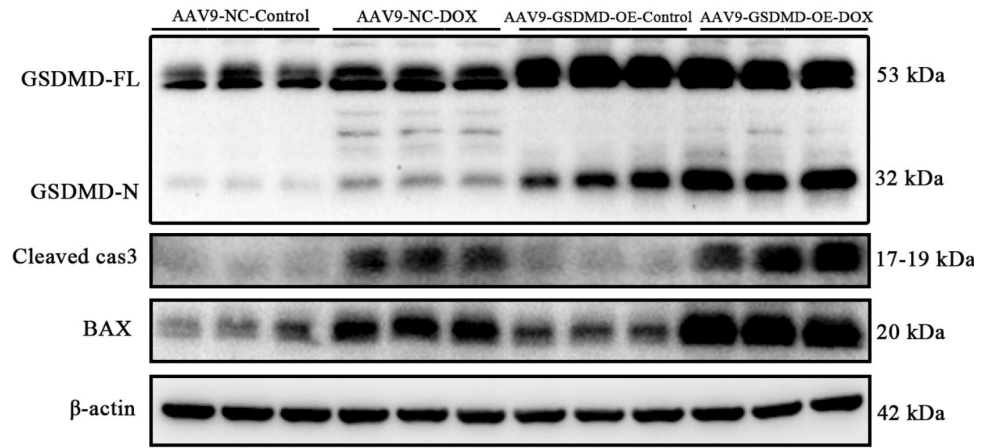

GSDMD

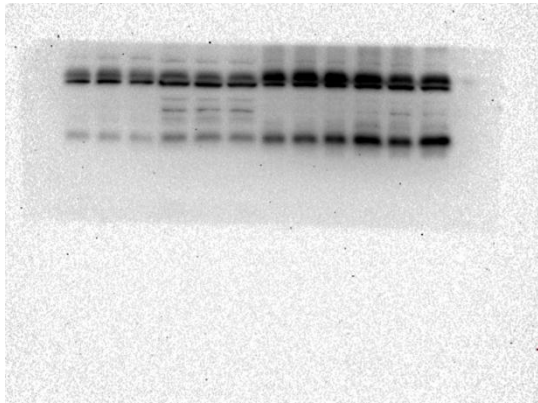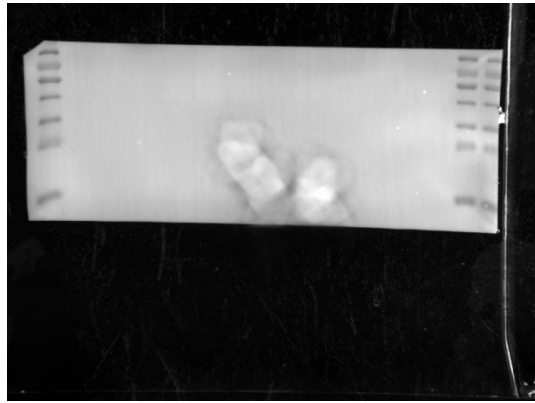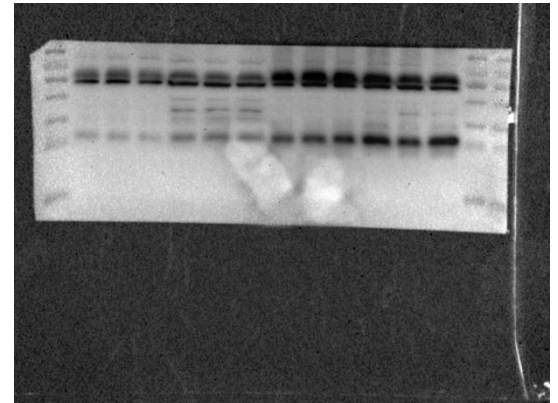

**BAX**

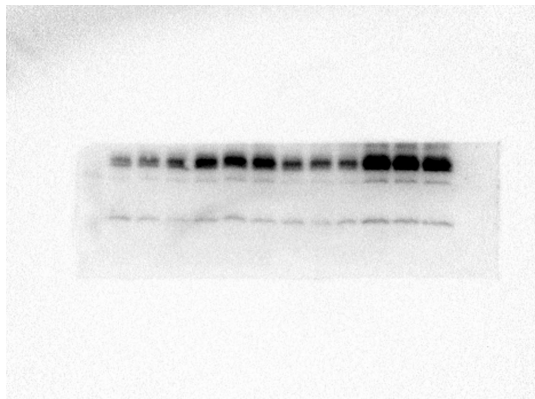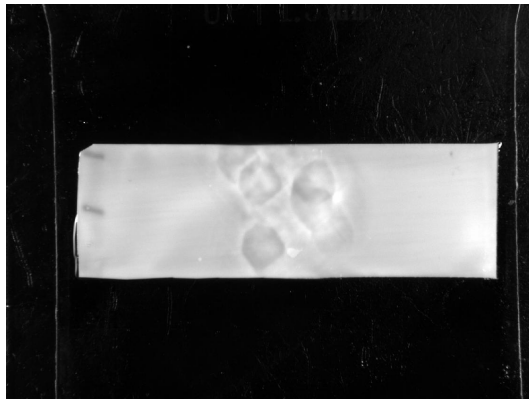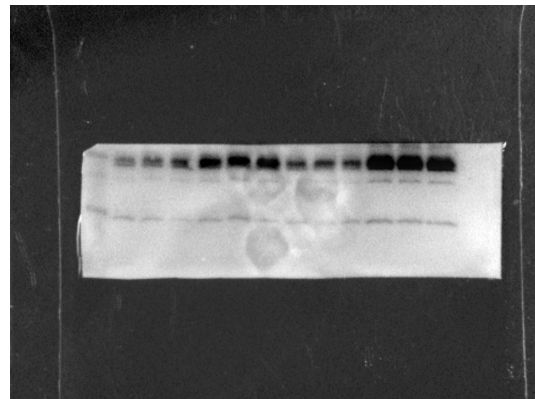

**Cleaved cas3**

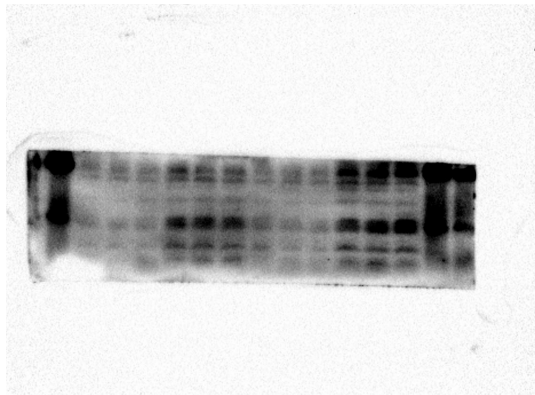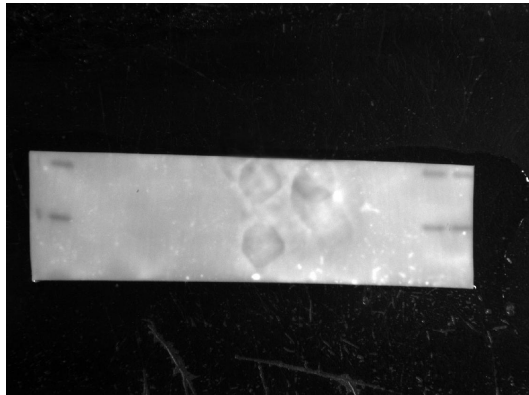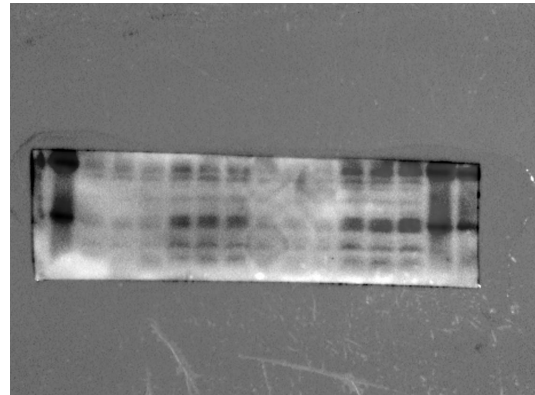

$\beta$ -actin

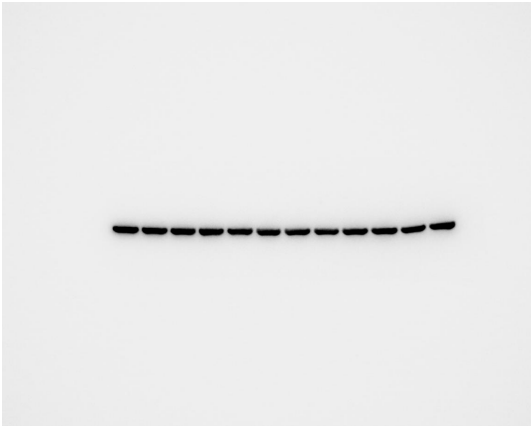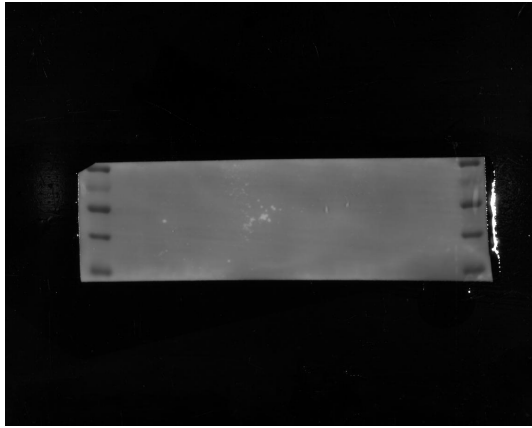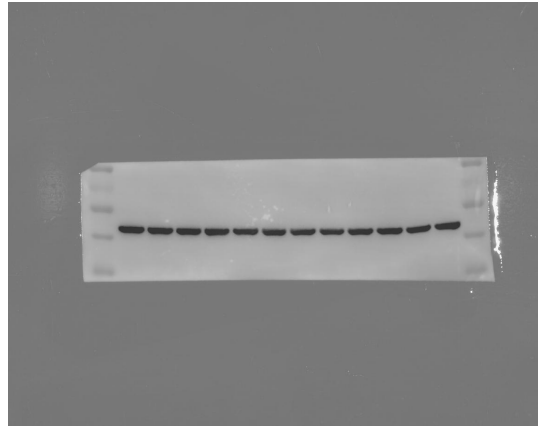



# Figure 2

**M****N**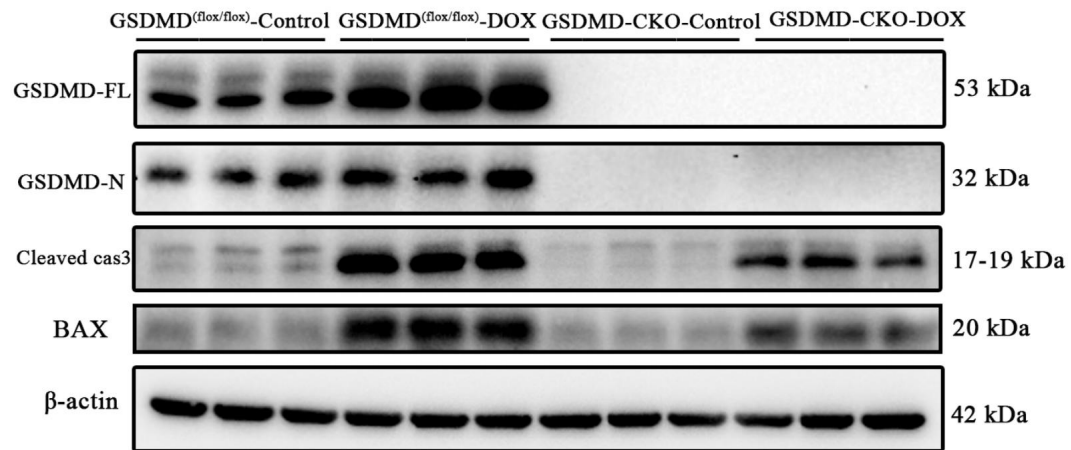**GSDMD-FL**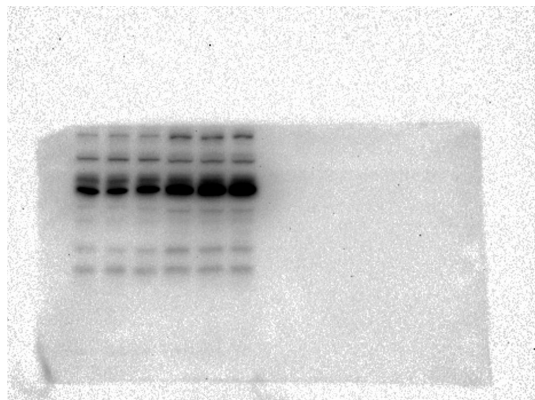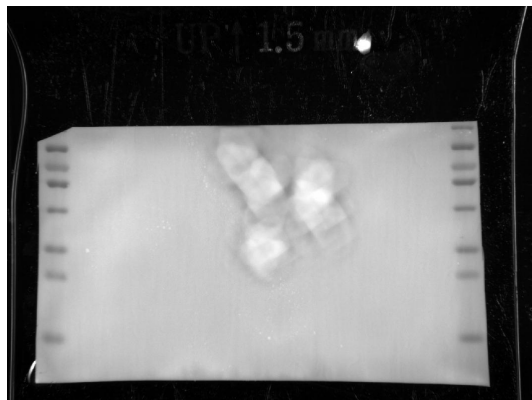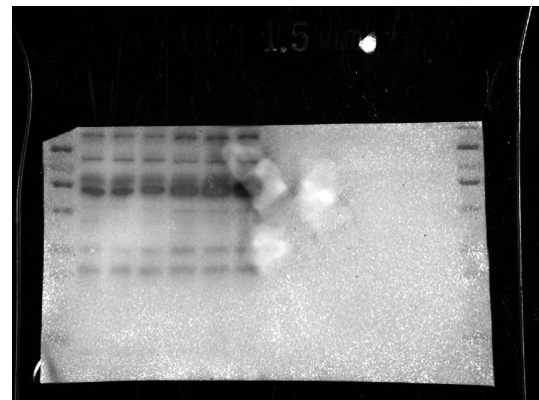

**GSDMD-N**

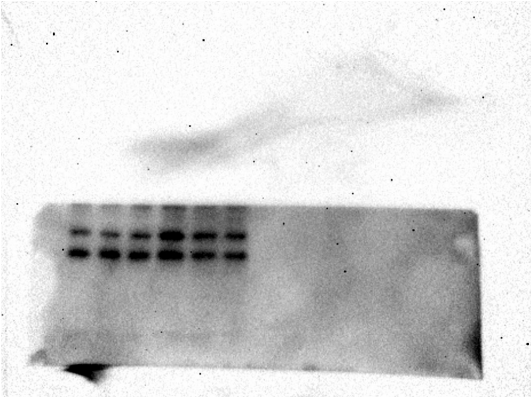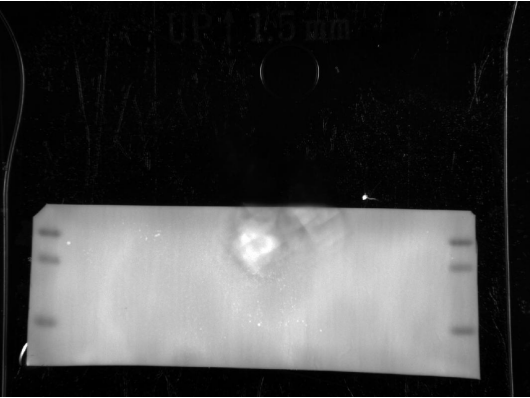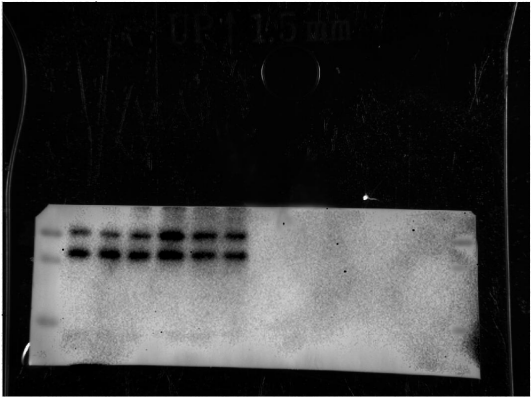

**Cleaved cas3**

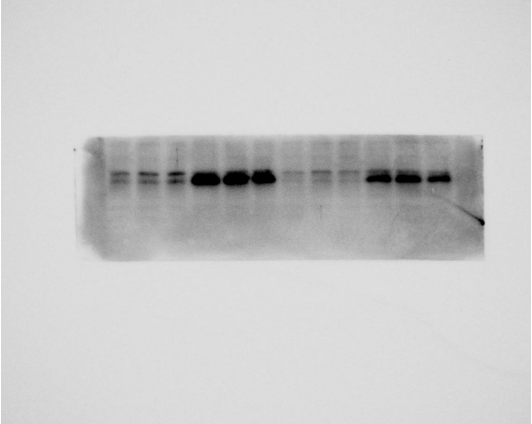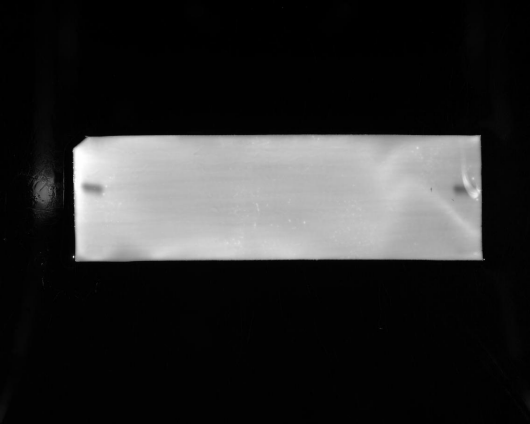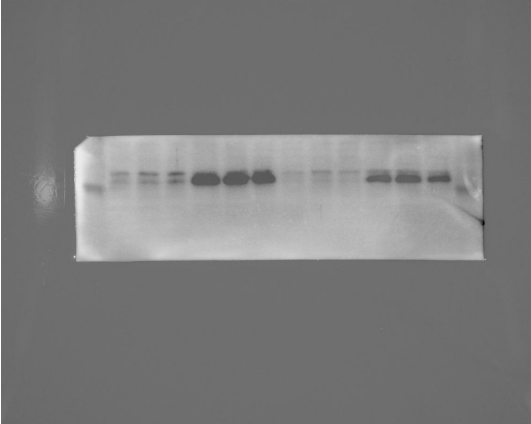

**BAX**

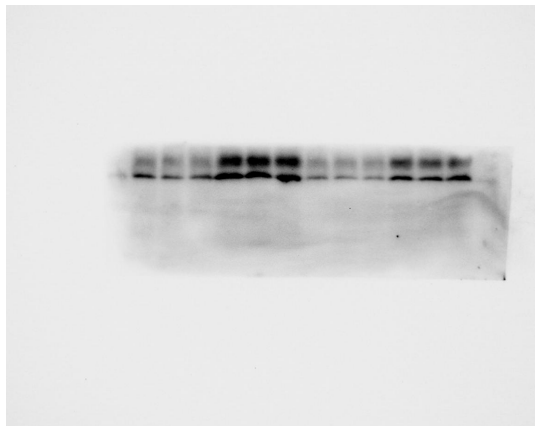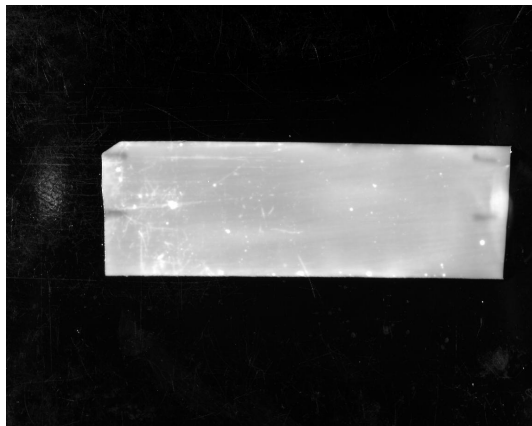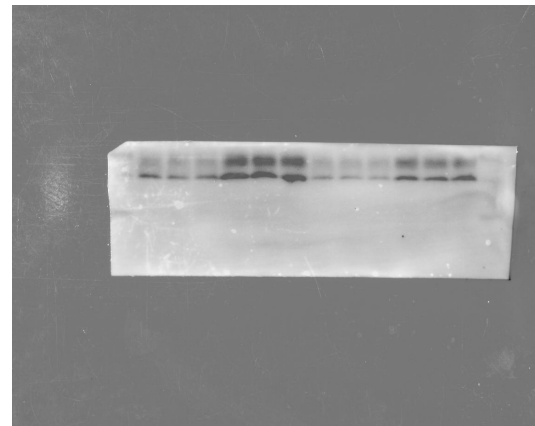

**$\beta$ -actin**

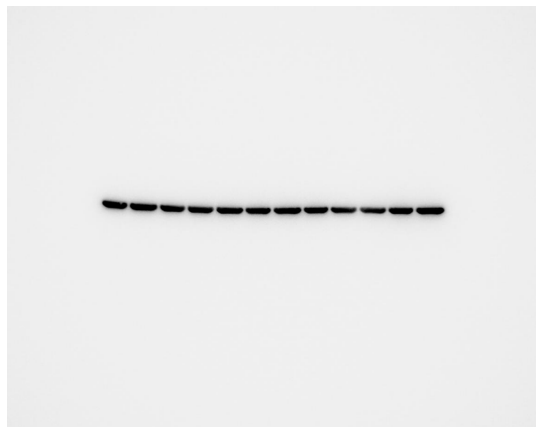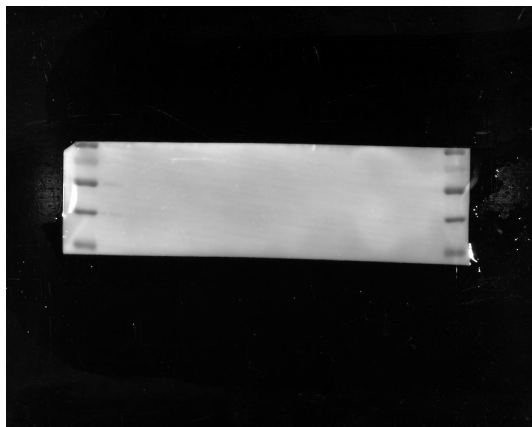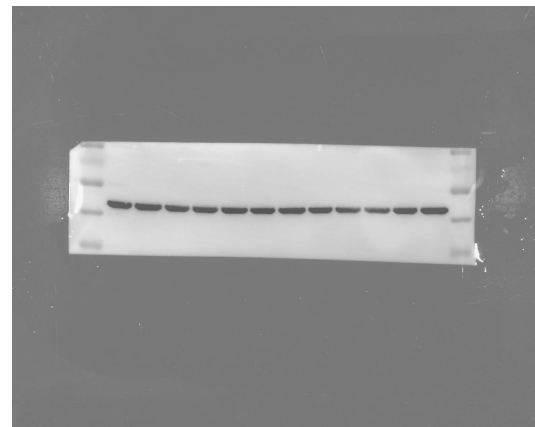

# Figure 3

**A**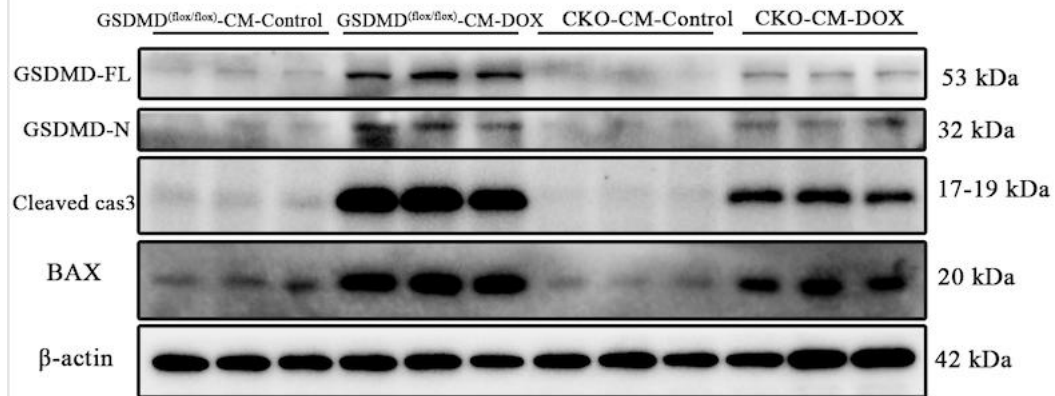**GSDMD-FL**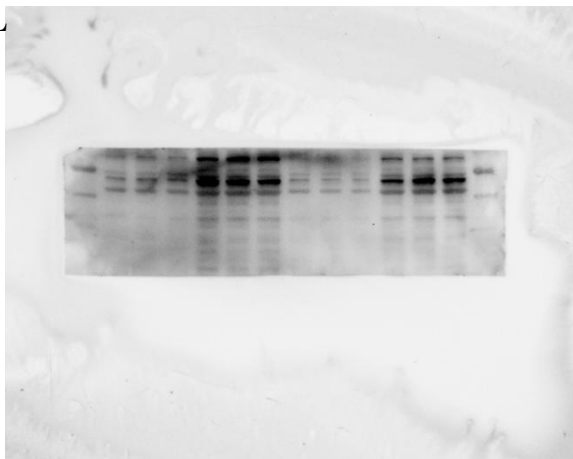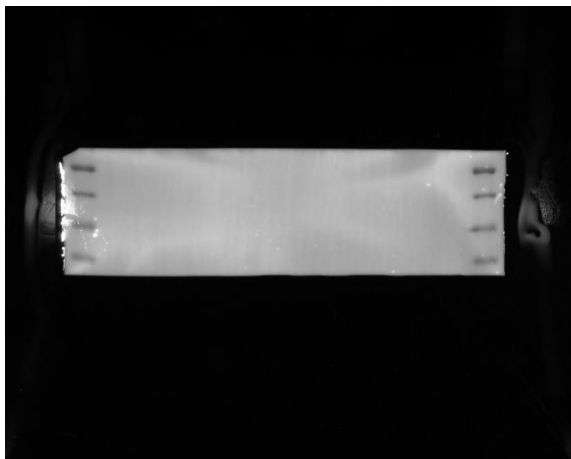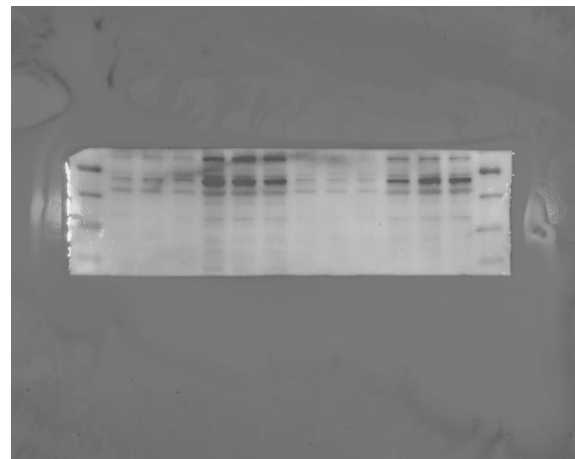

GSDMD-N

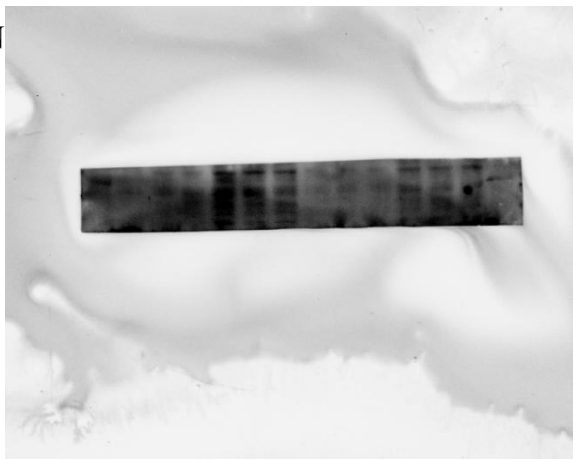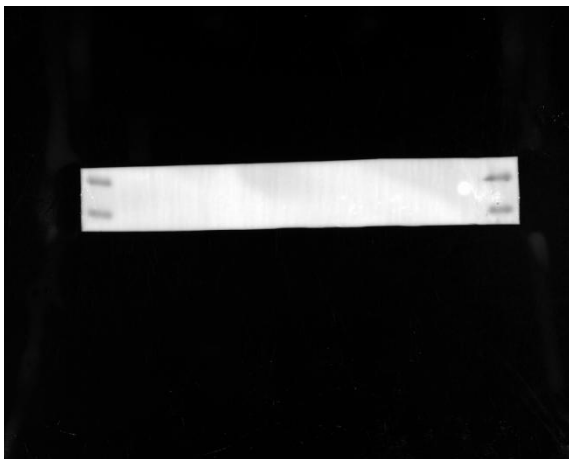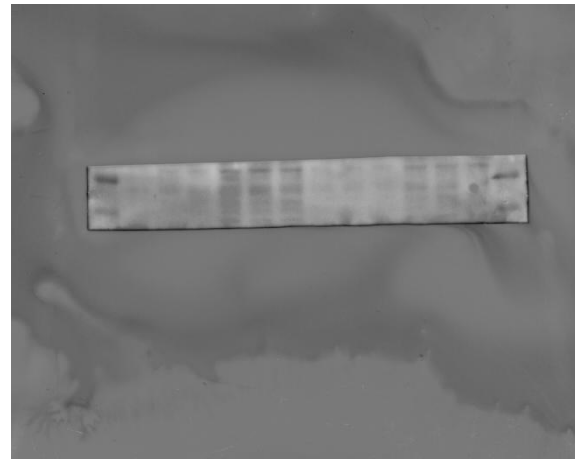

CC3

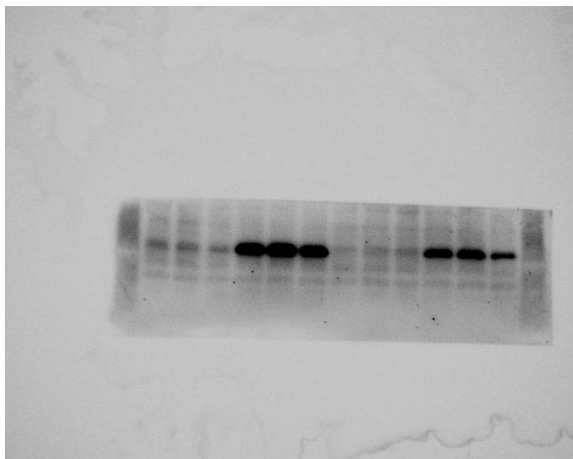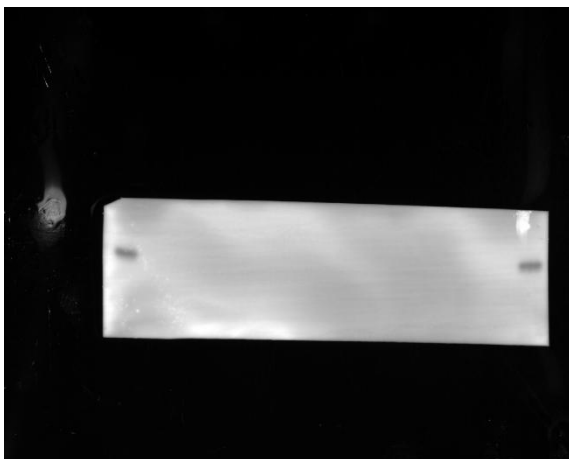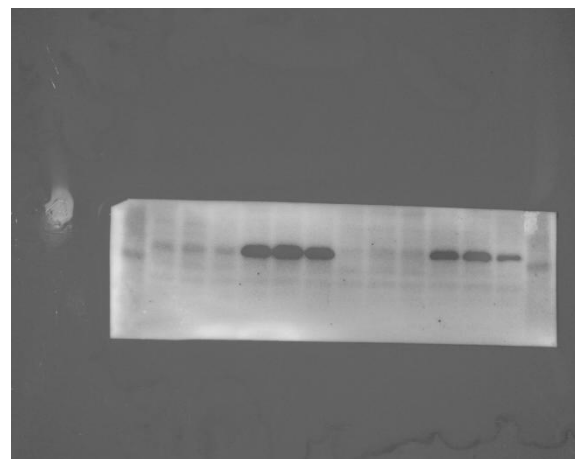

**BAX**

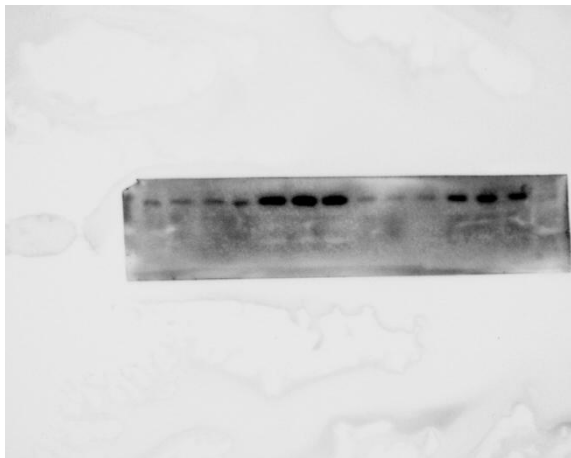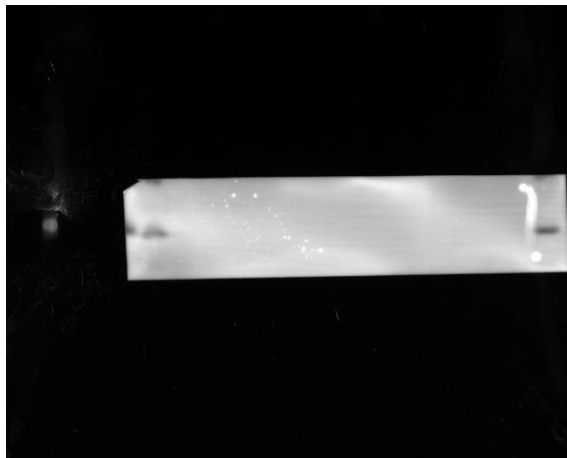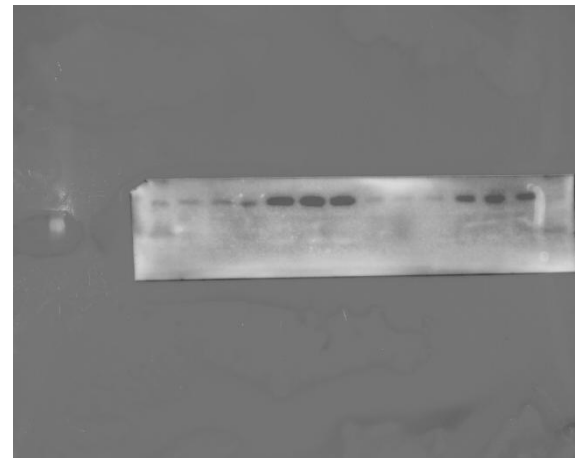

**$\beta$ -actin**

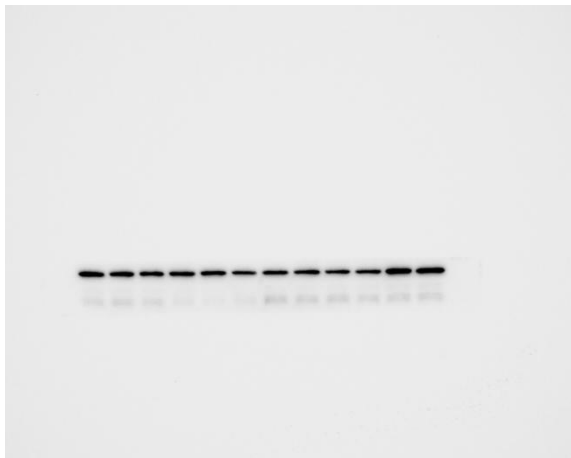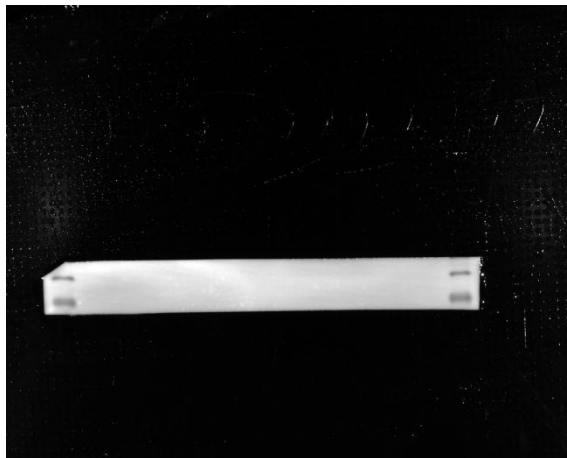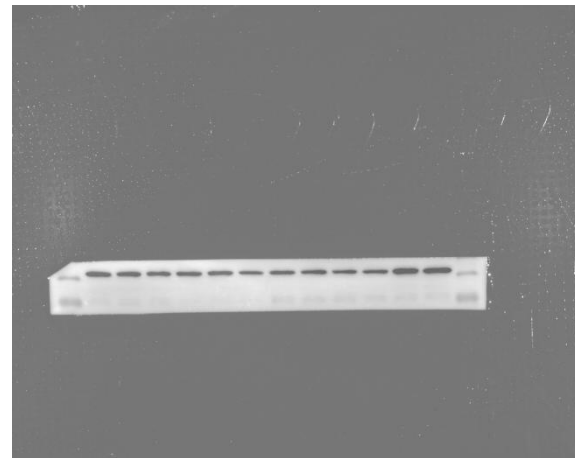



E

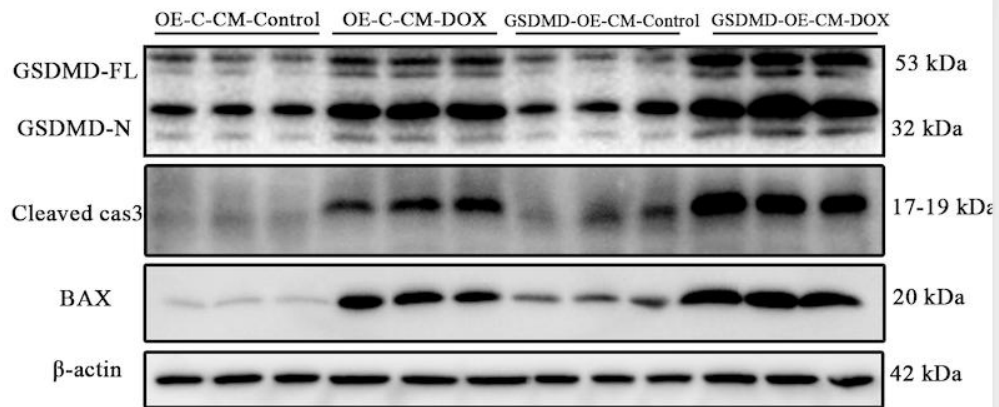

GSDMD

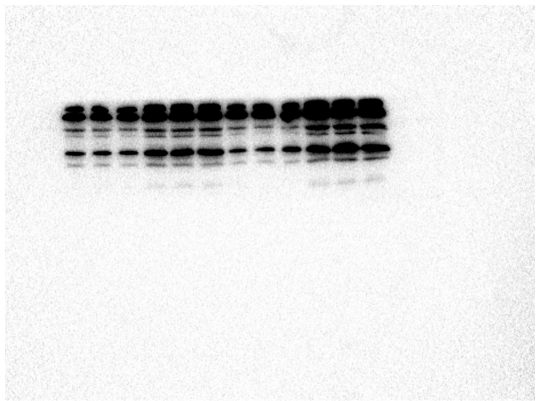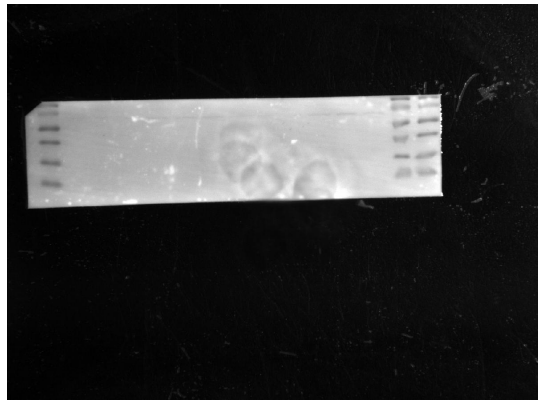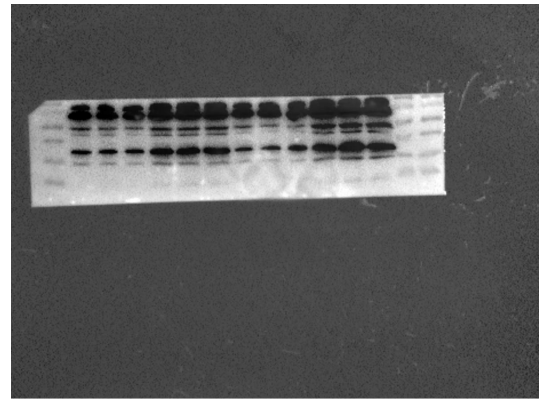

**CC3**

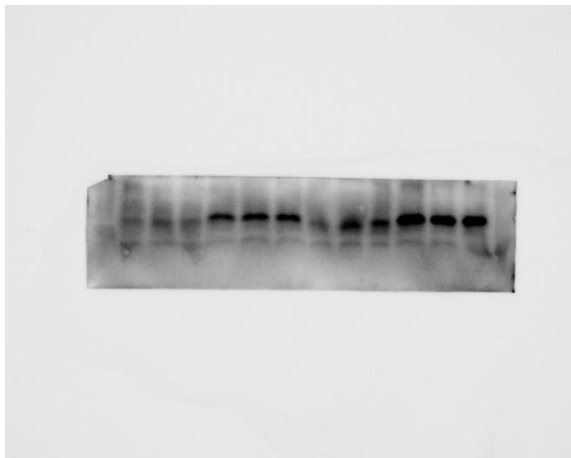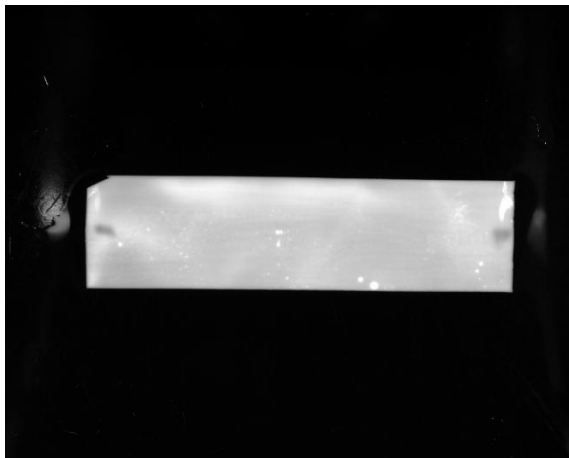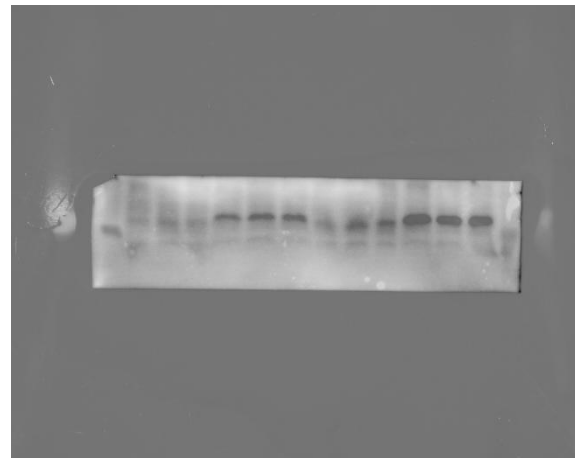

**BAX**

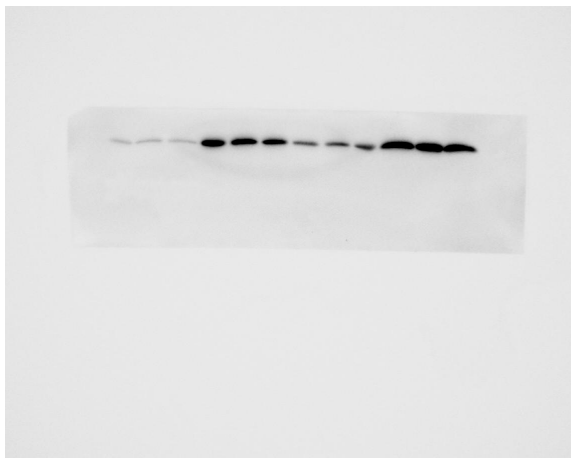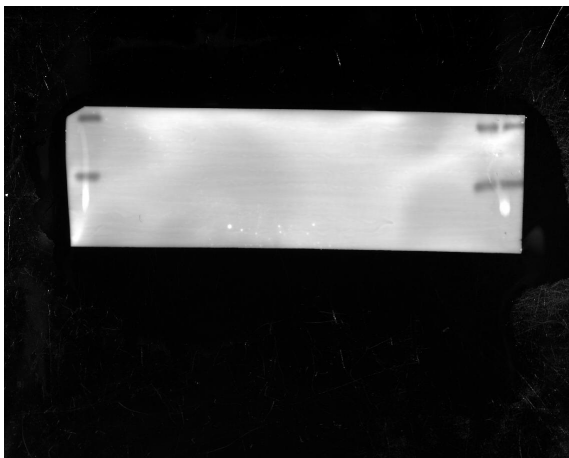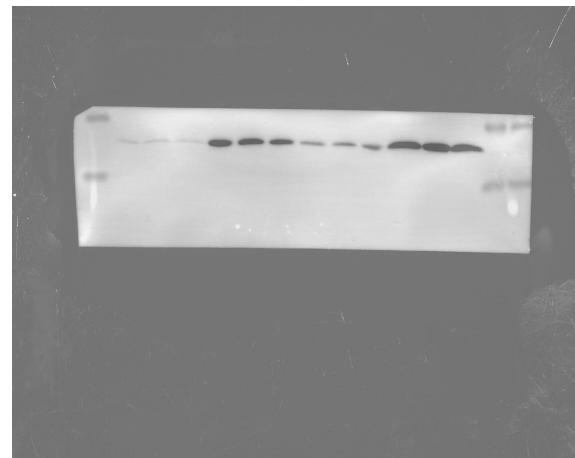

$\beta$ -actin

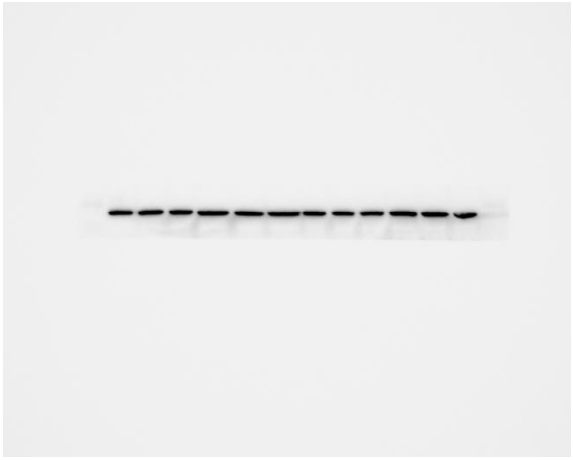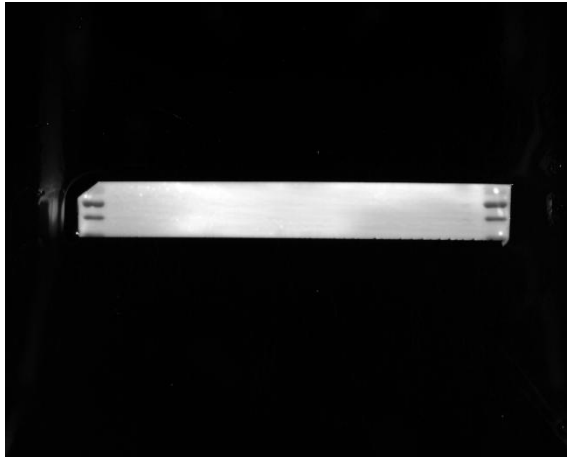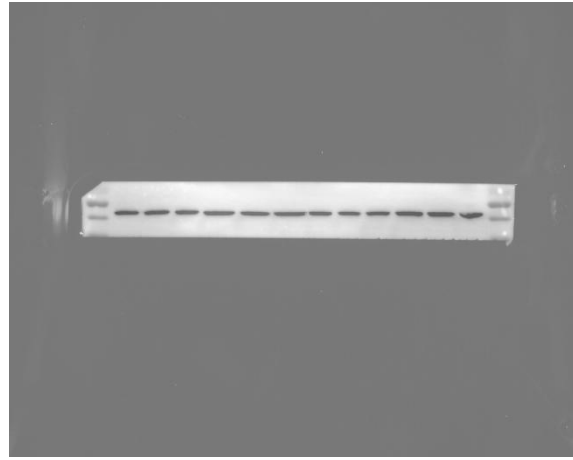

# Figure 4

**A**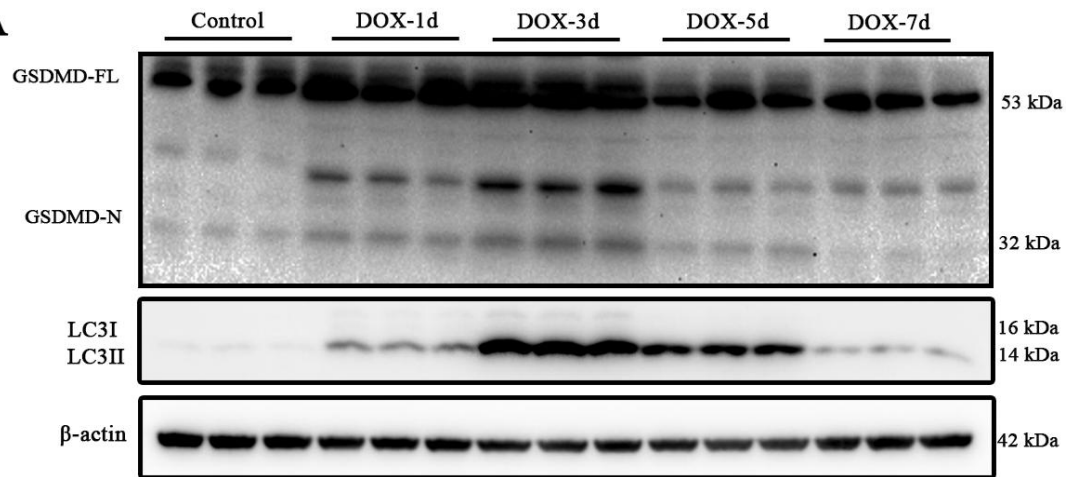**GSDMD**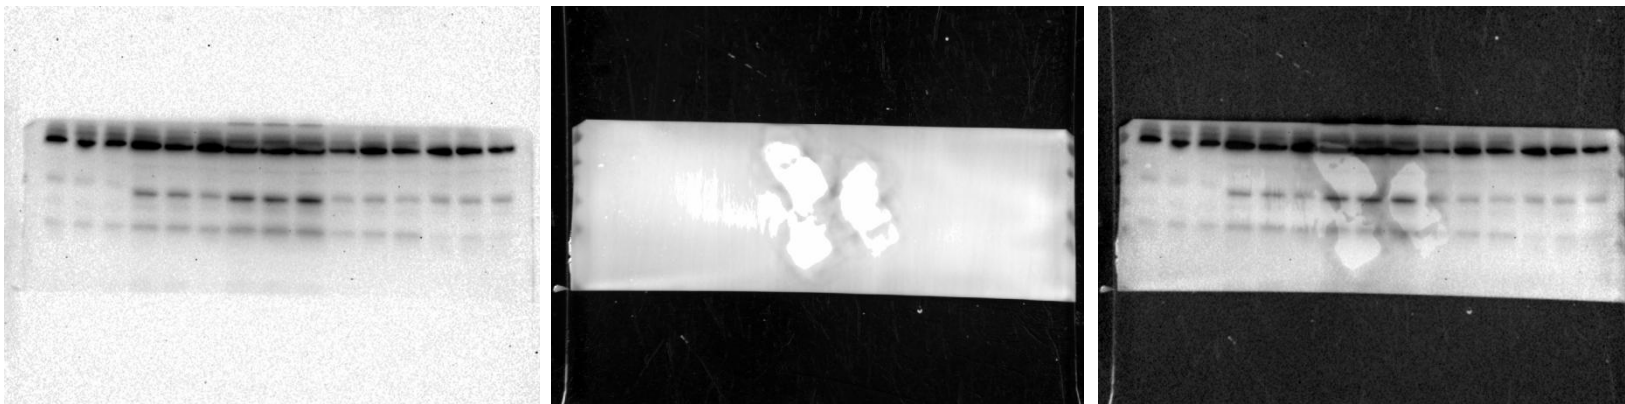

LC3

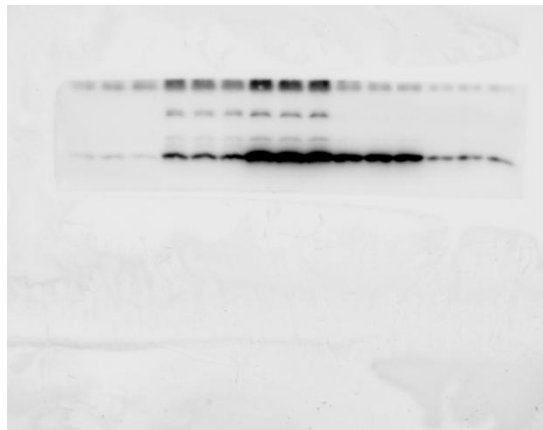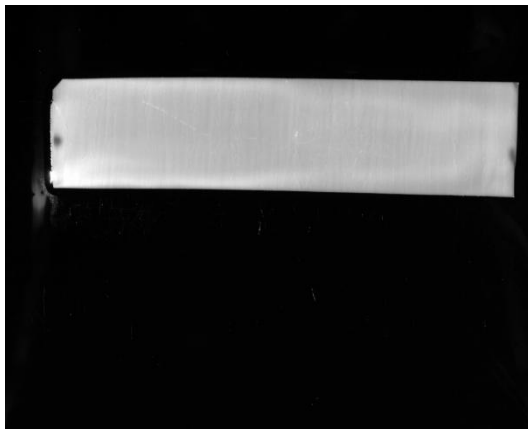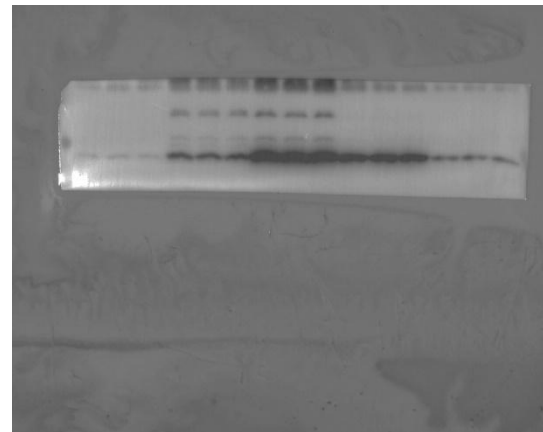

$\beta$ -actin

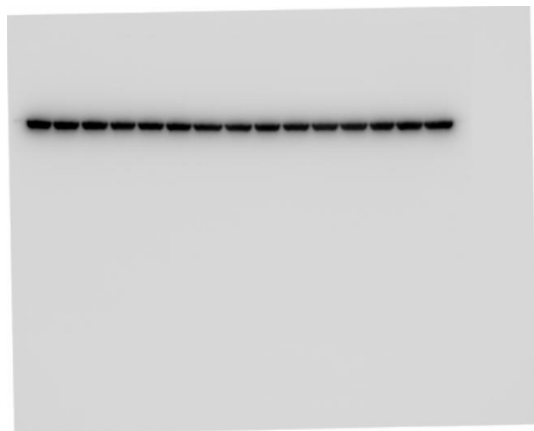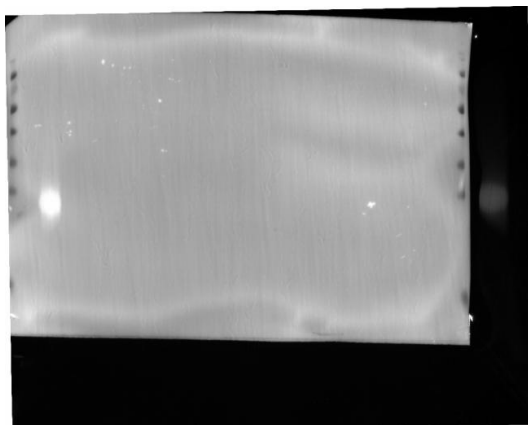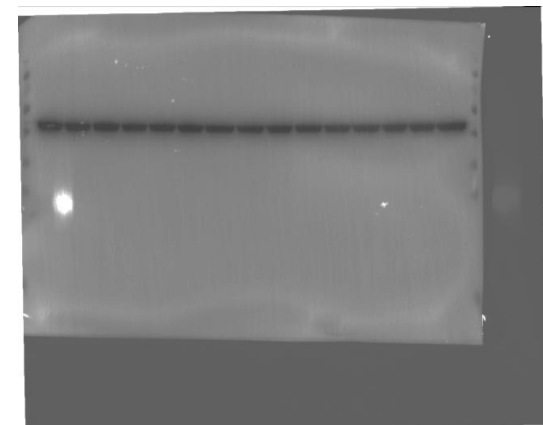

**D**GSDMD<sup>(flox/flox)</sup>-Control GSDMD<sup>(flox/flox)</sup>-DOX GSDMD-CKO-Control GSDMD-CKO-DOX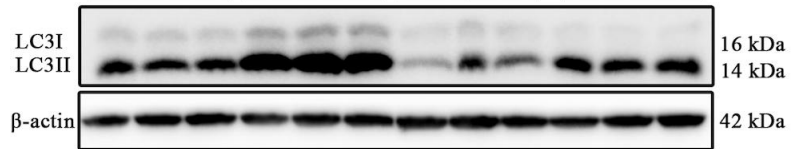**LC3**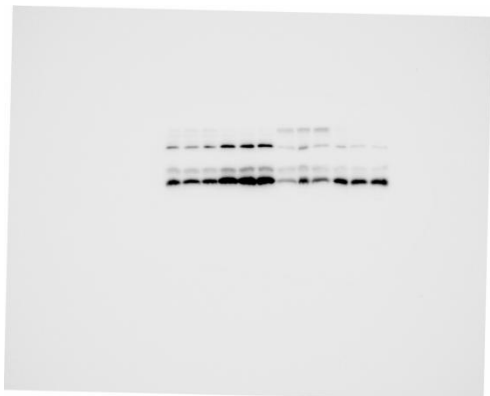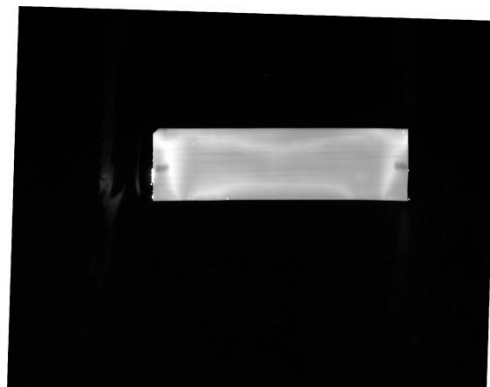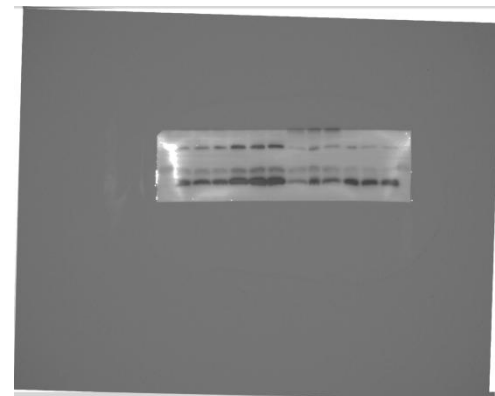 **$\beta$ -actin**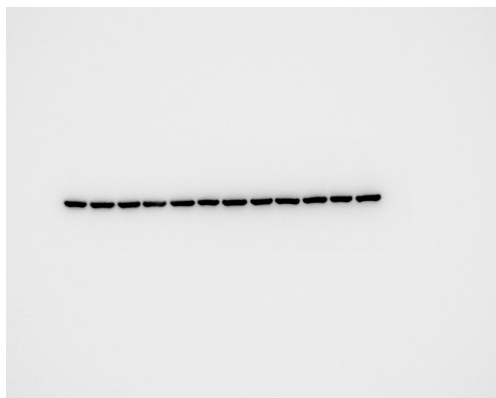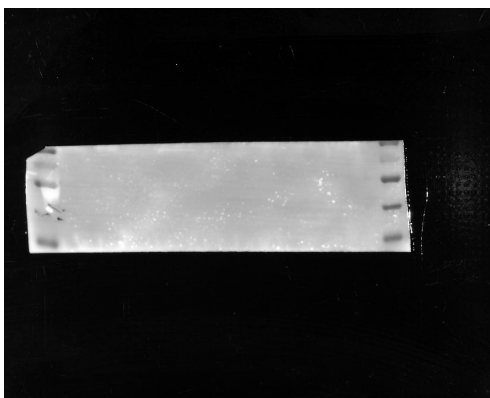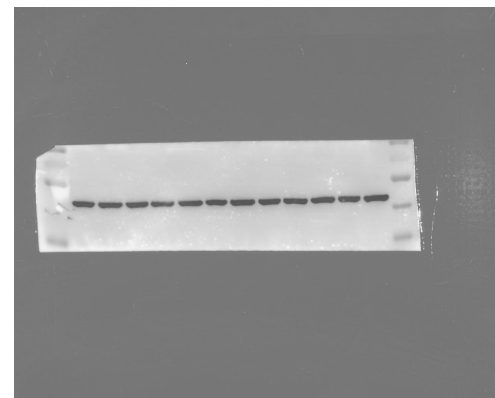

**E**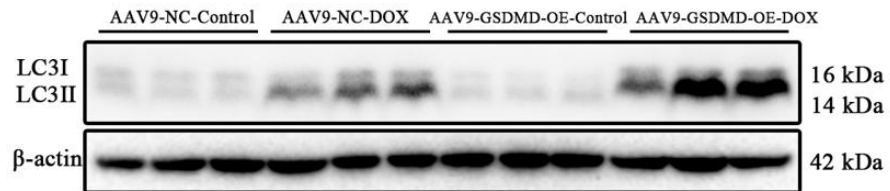**LC3**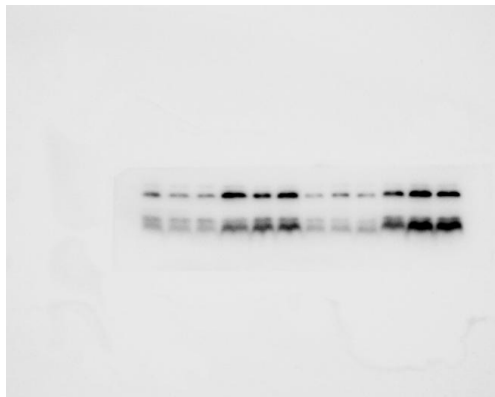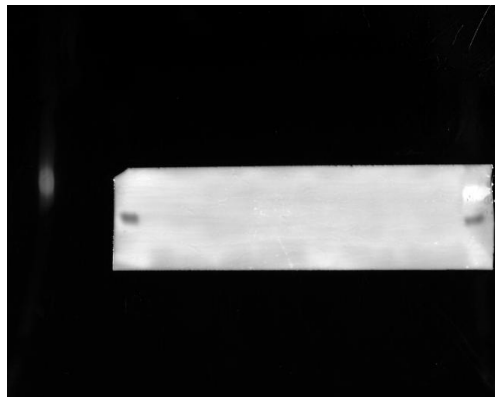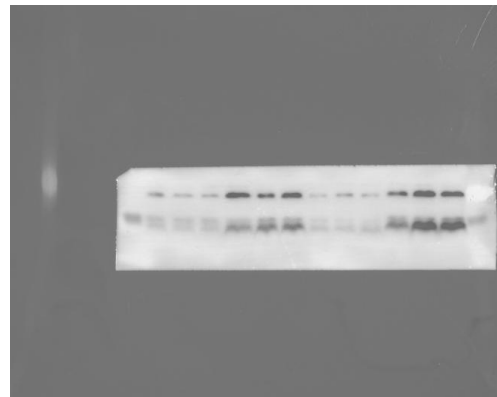 **$\beta$ -actin**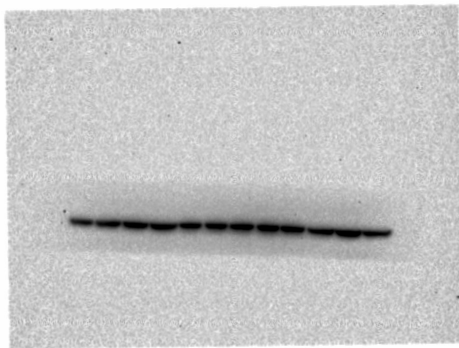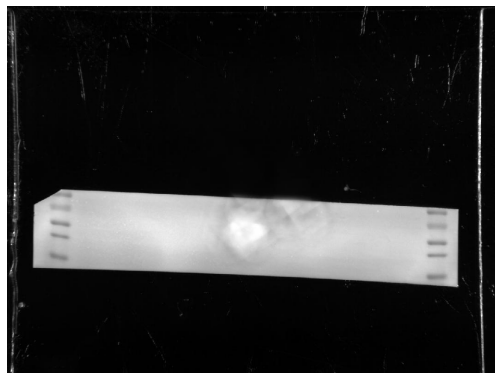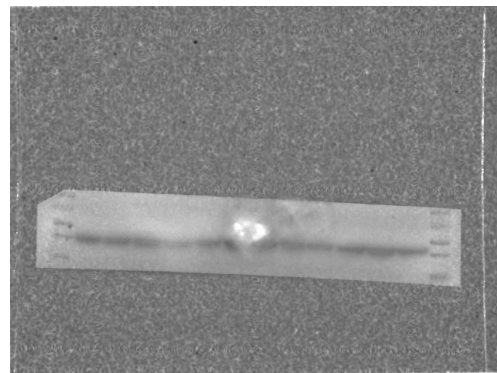



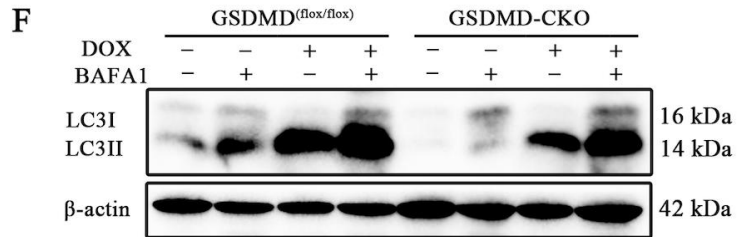

**LC3**

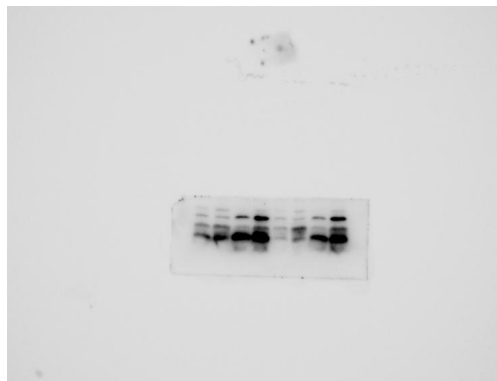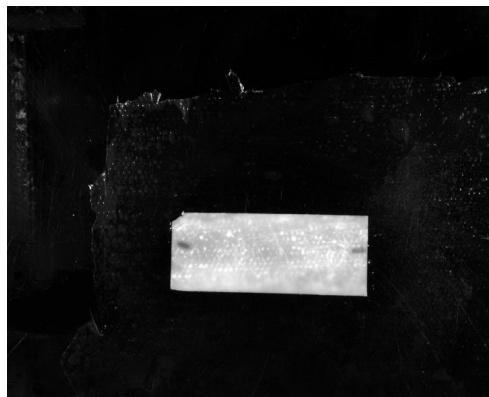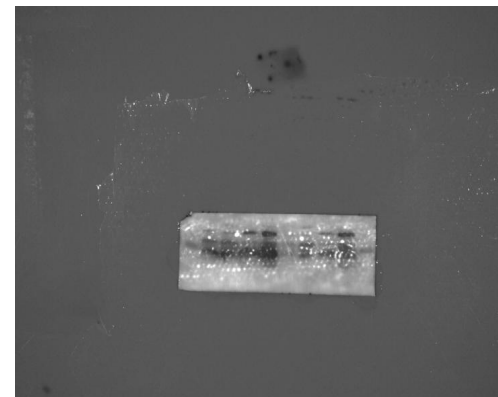

**$\beta$ -actin**

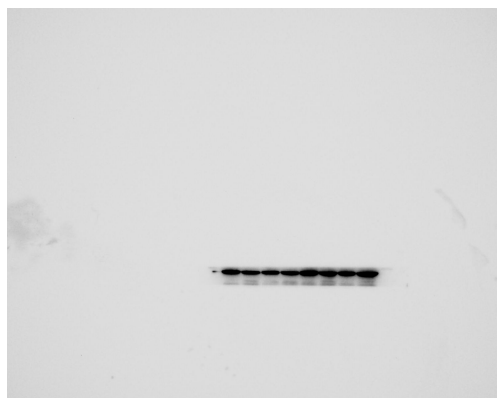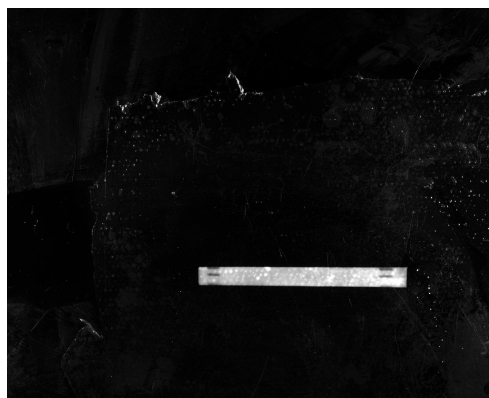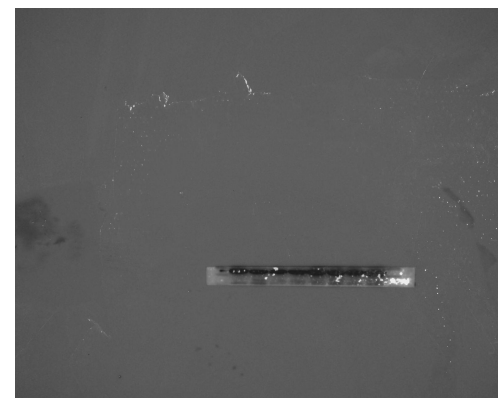

**G**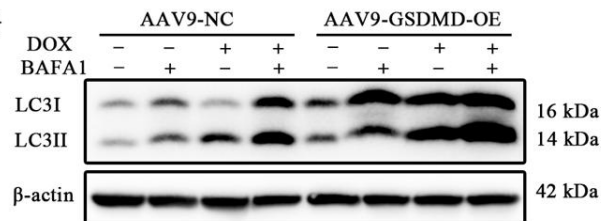**LC3**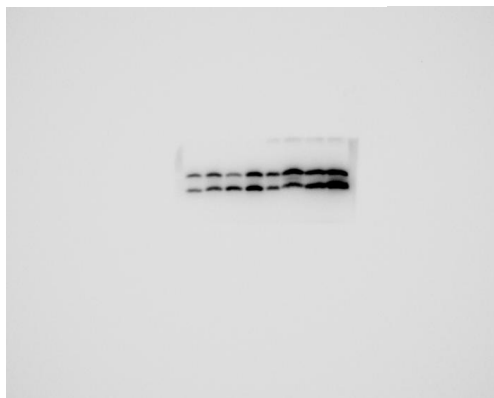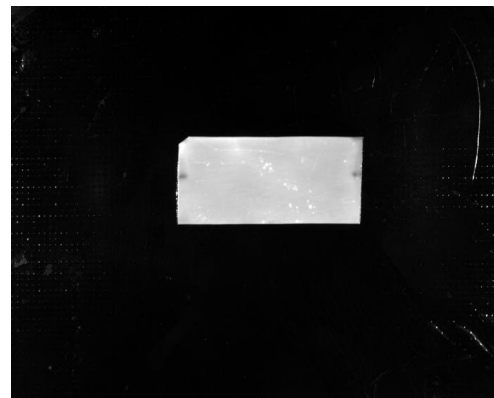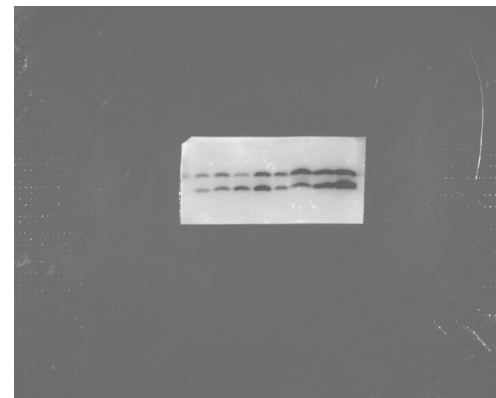 **$\beta$ -actin**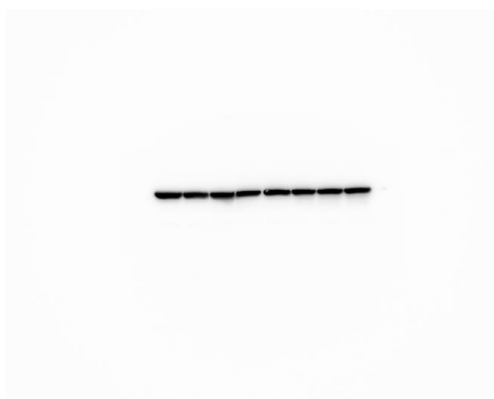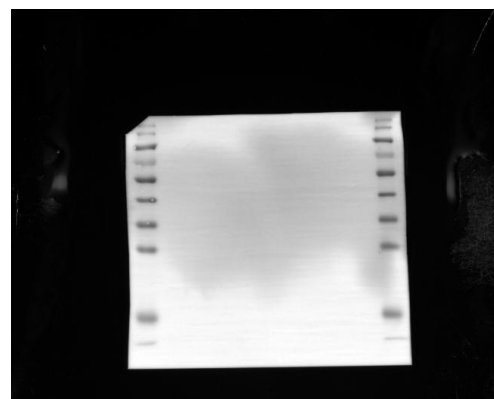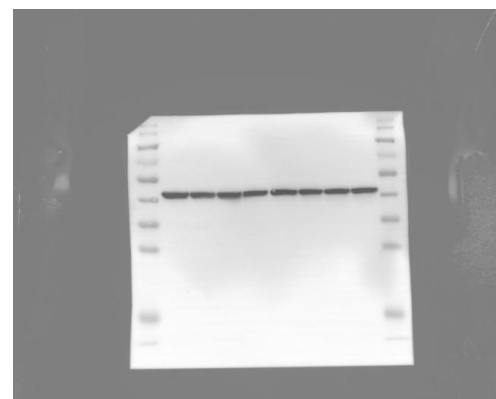

# Figure 5

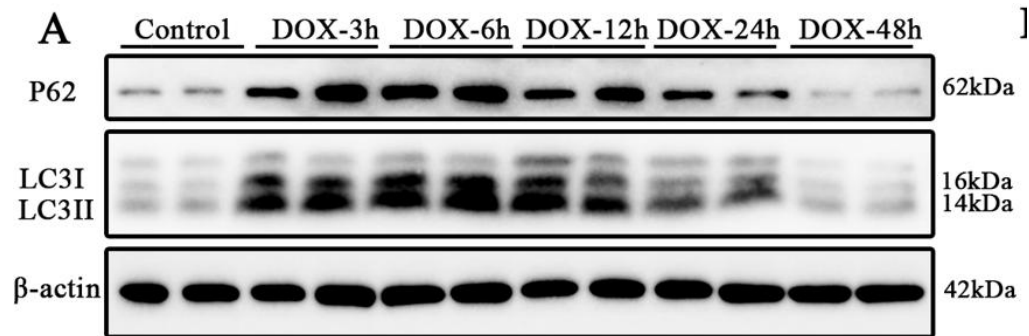

P62

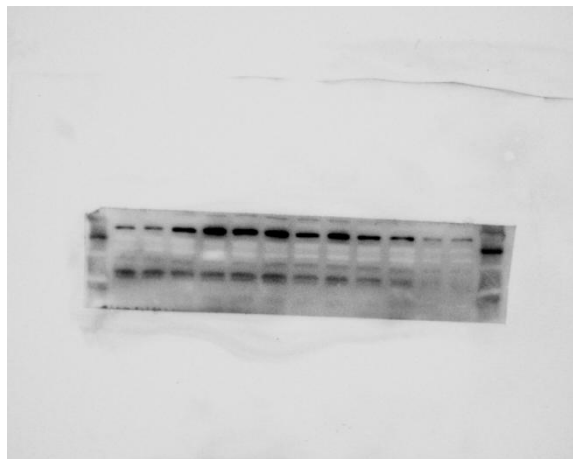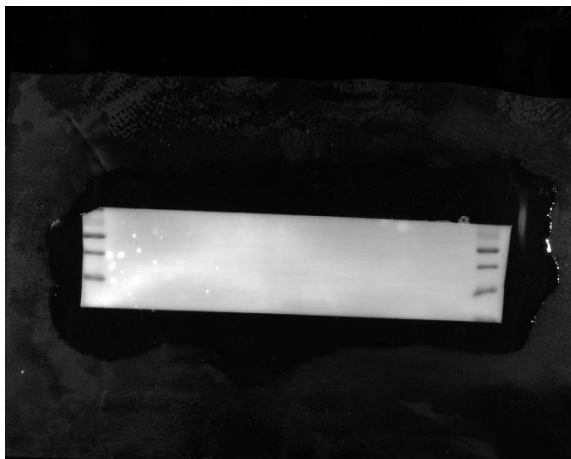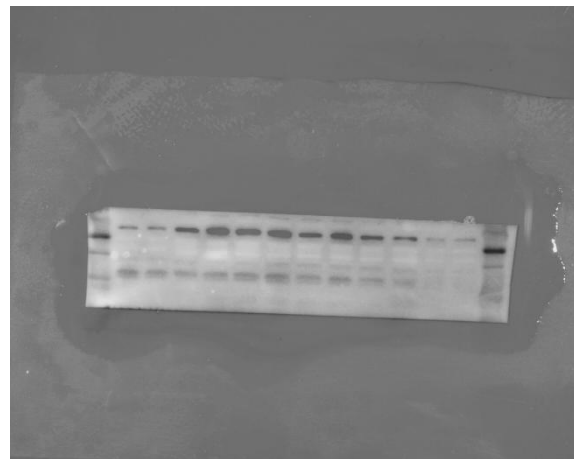

LC3

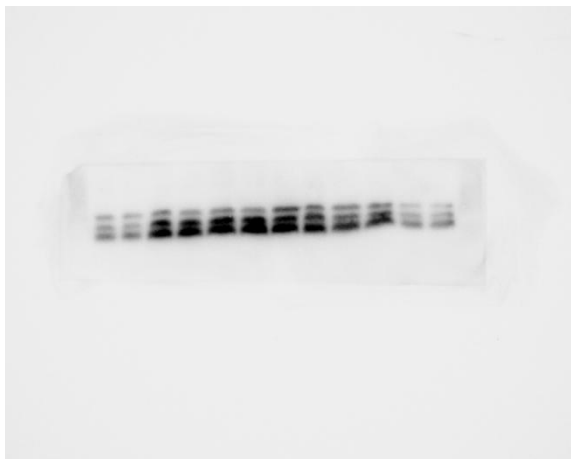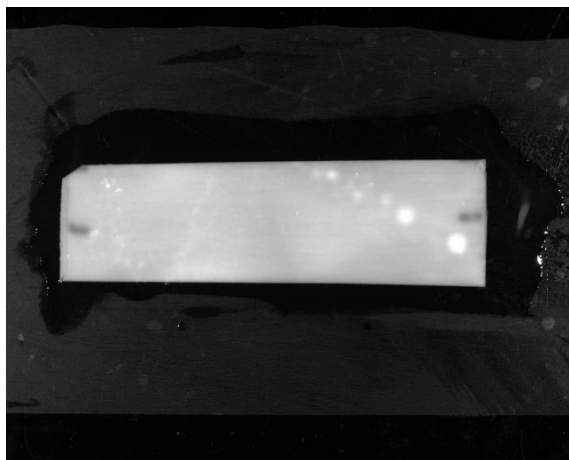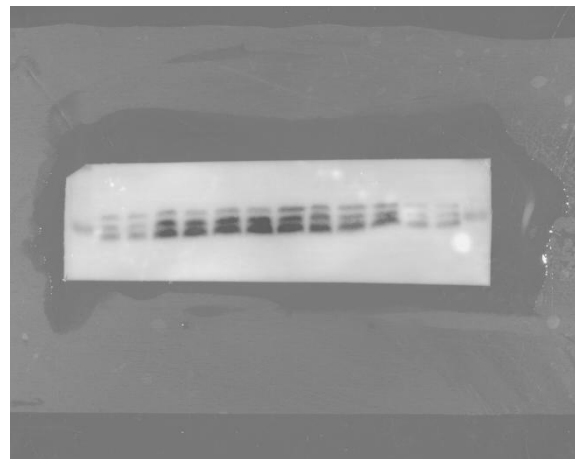

$\beta$ -actin

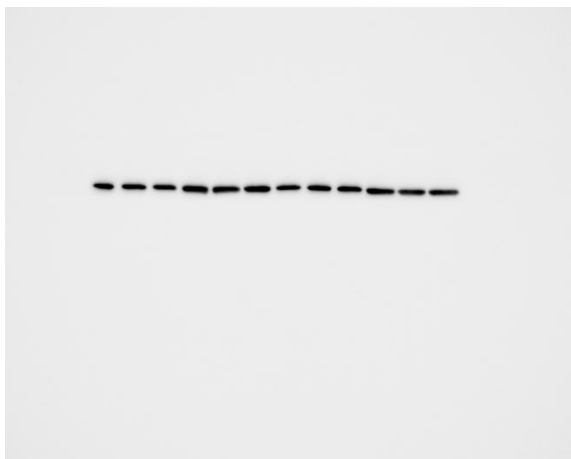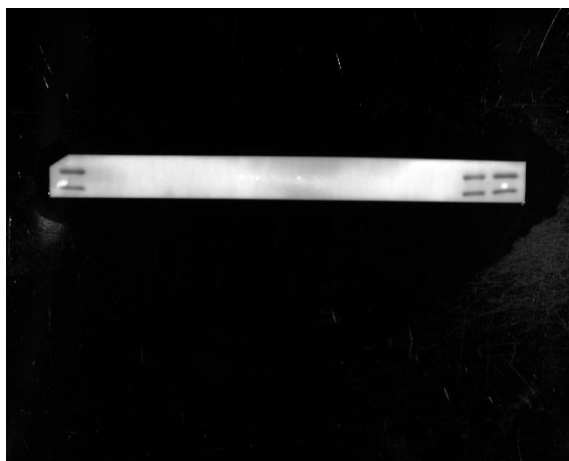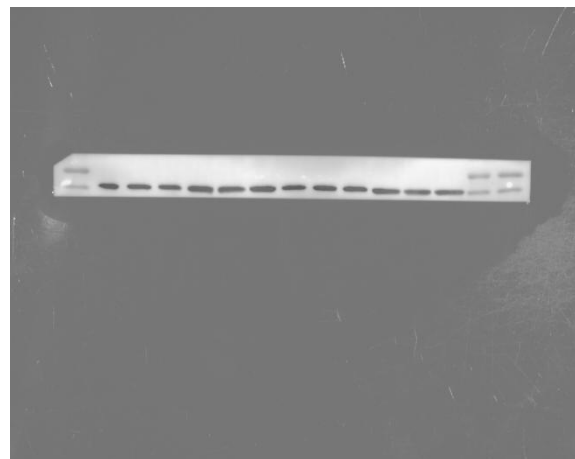

**D**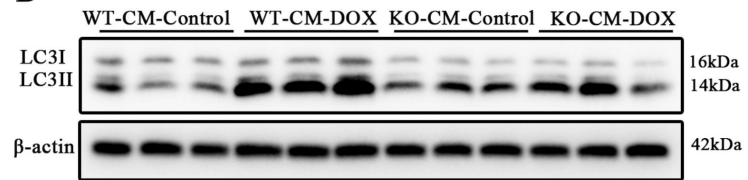**LC3**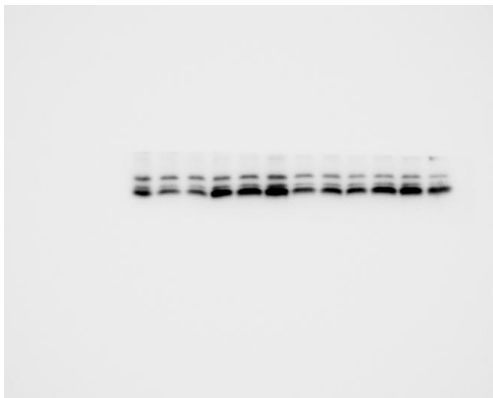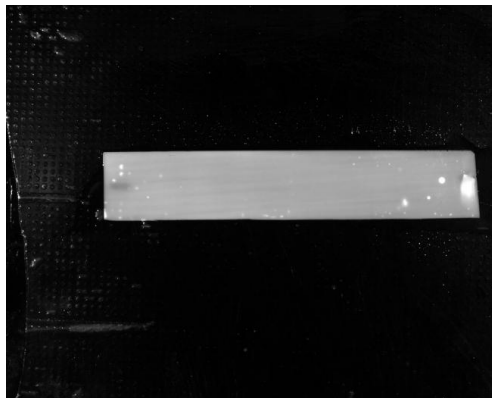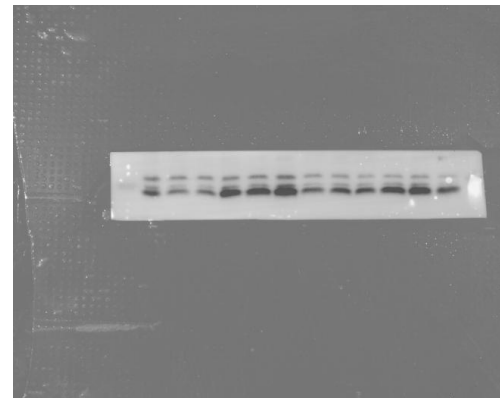 **$\beta$ -actin**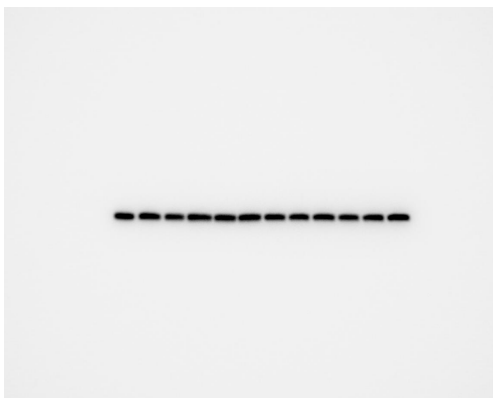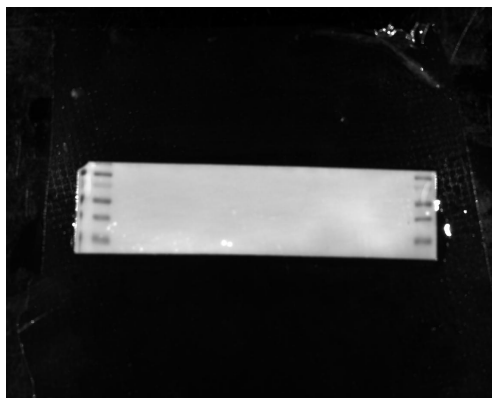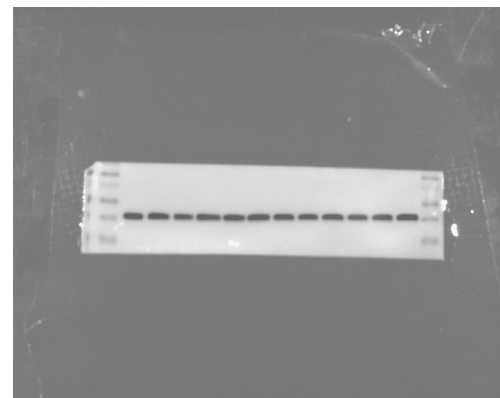

**E**

OE-C-CM-Control OE-C-CM-DOX GSDMD-OE-CM-Control GSDMD-OE-CM-DOX

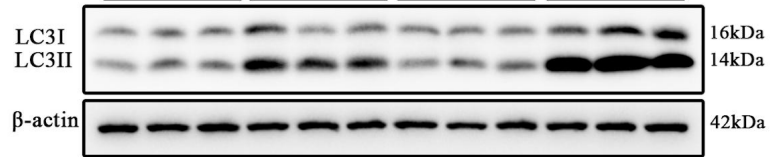**LC3**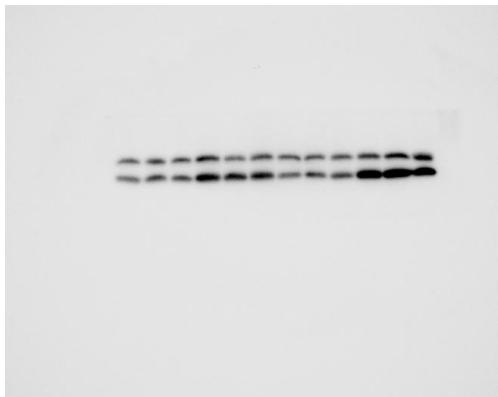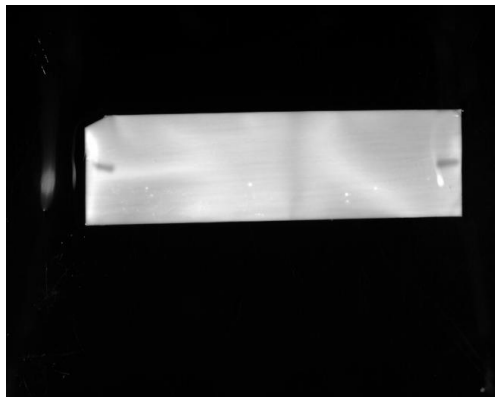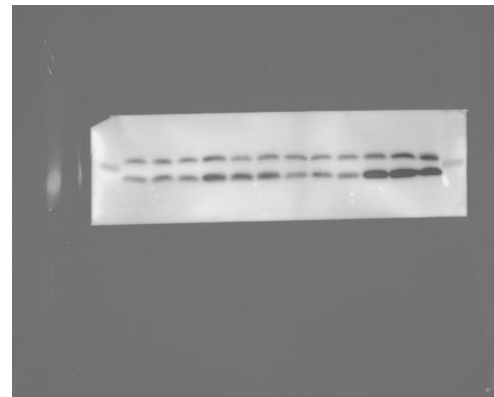 **$\beta$ -actin**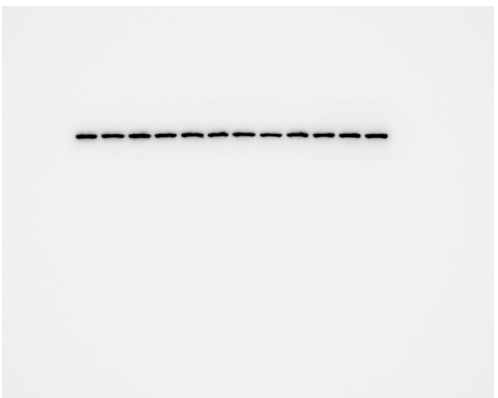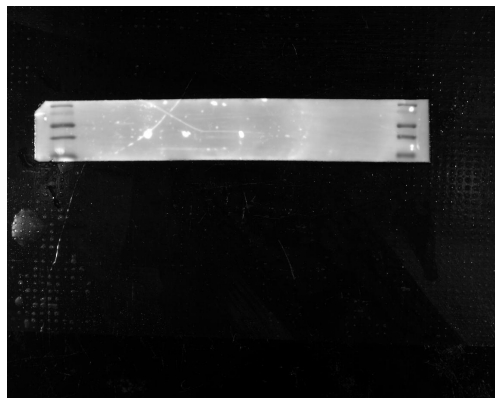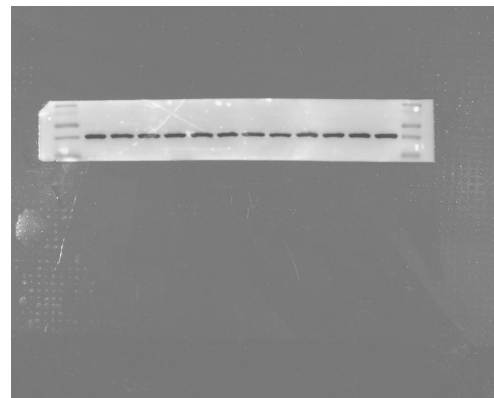

**I**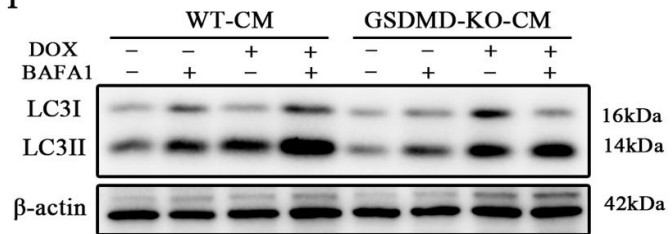**LC3**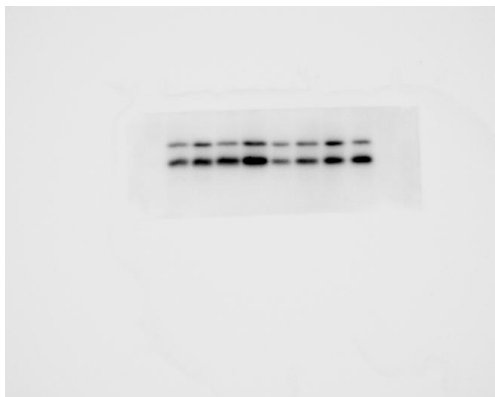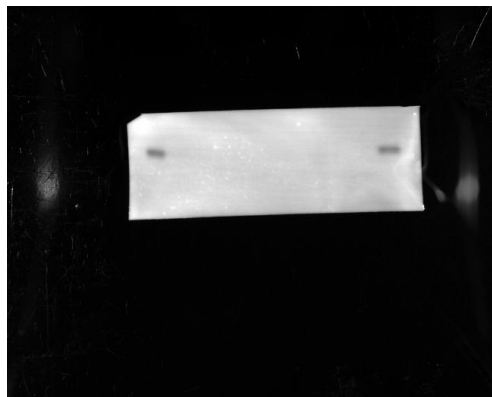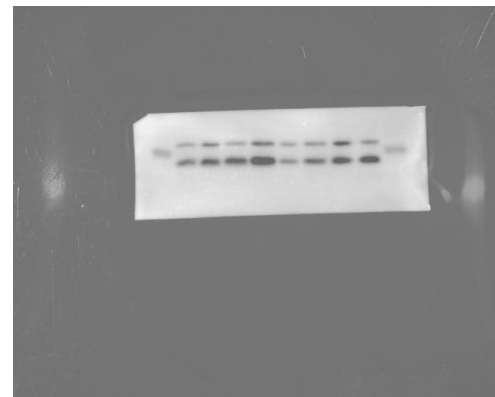 **$\beta$ -actin**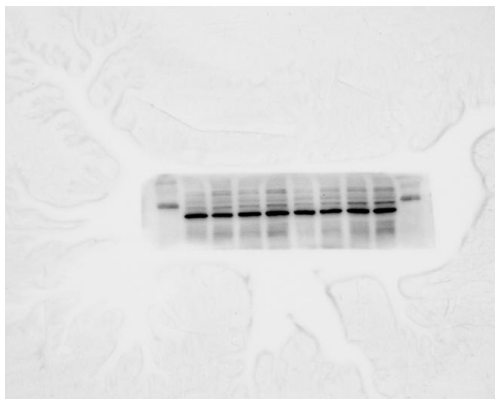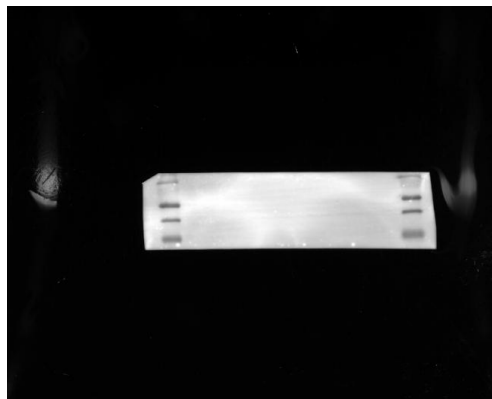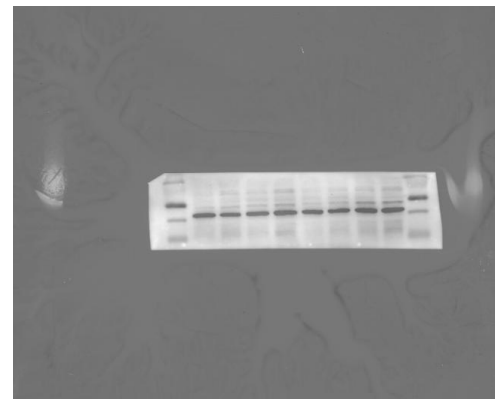



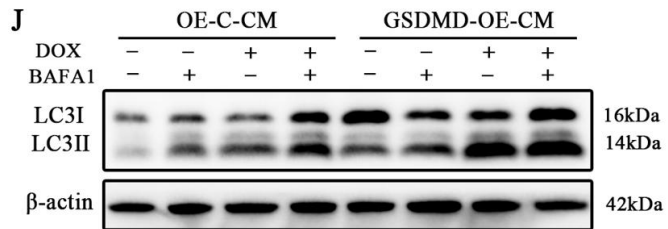

**LC3**

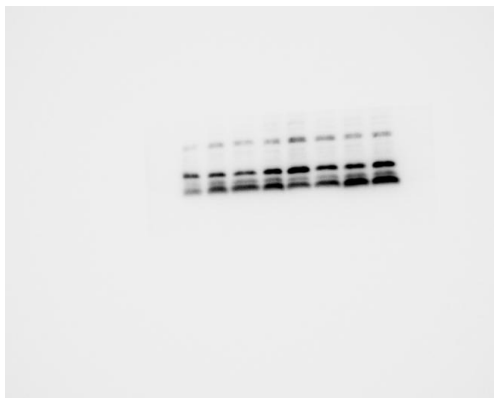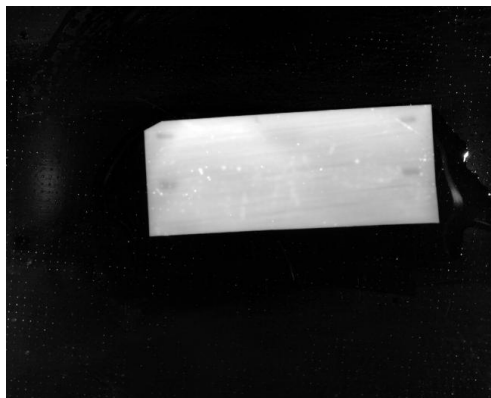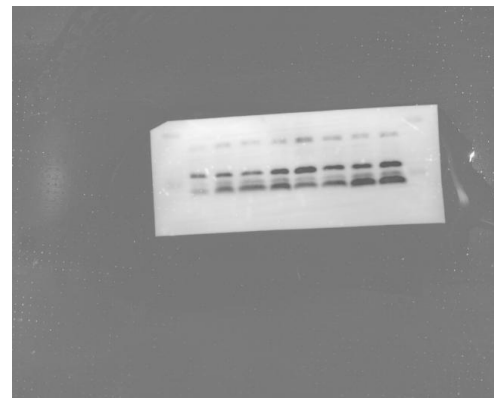

**$\beta$ -actin**

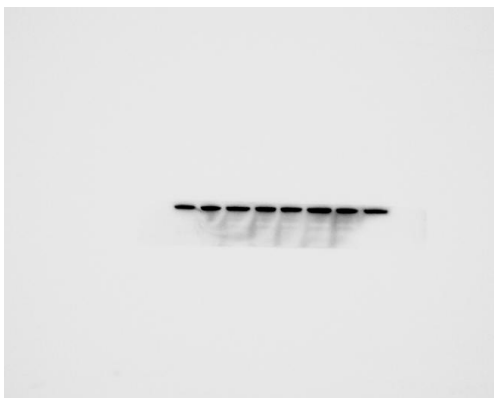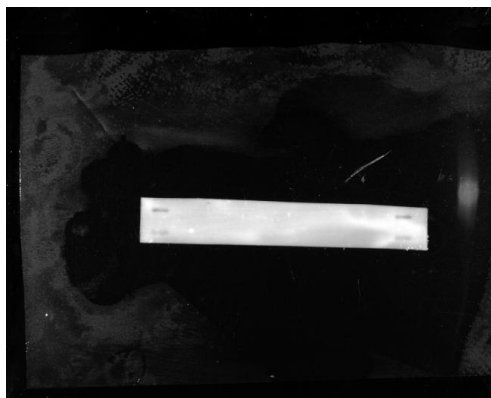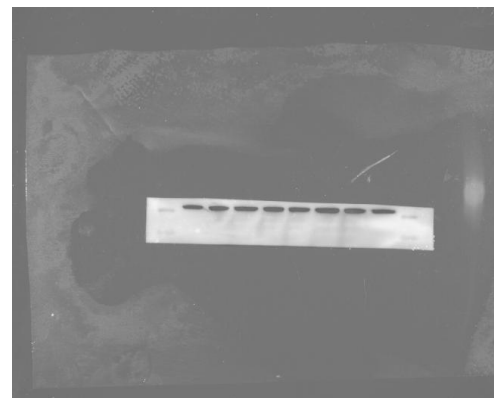

# Figure 6

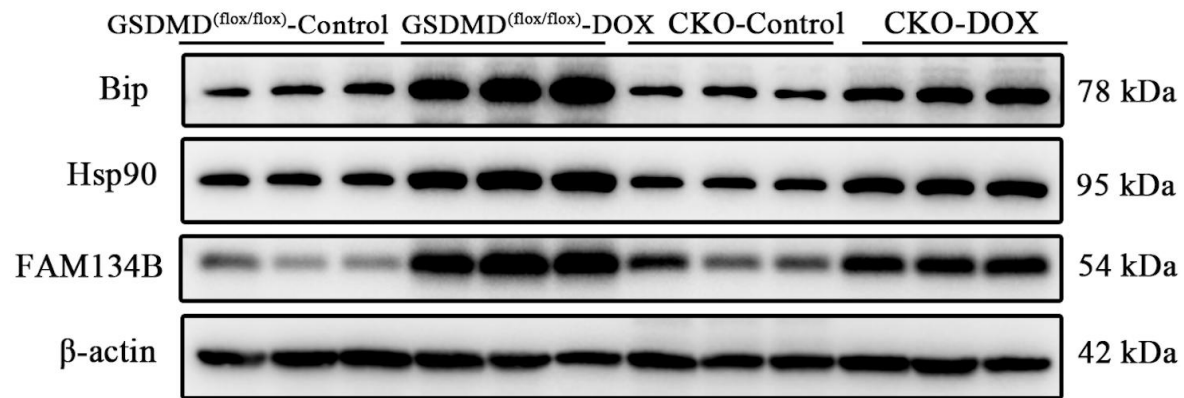

Bip

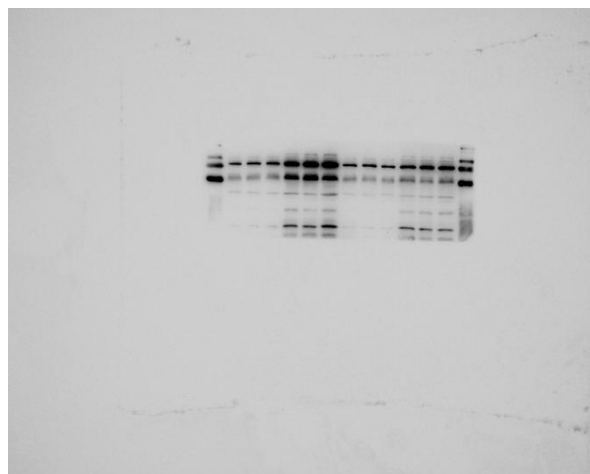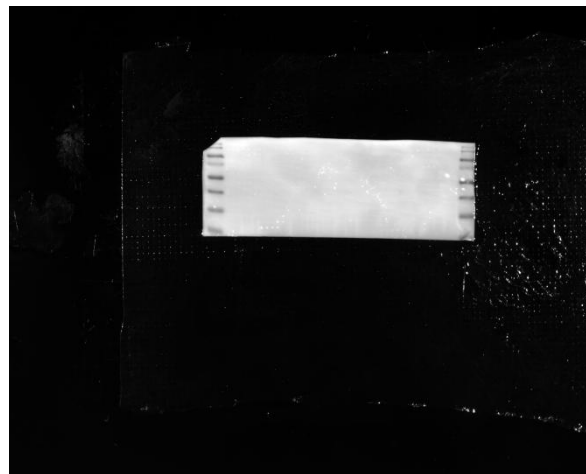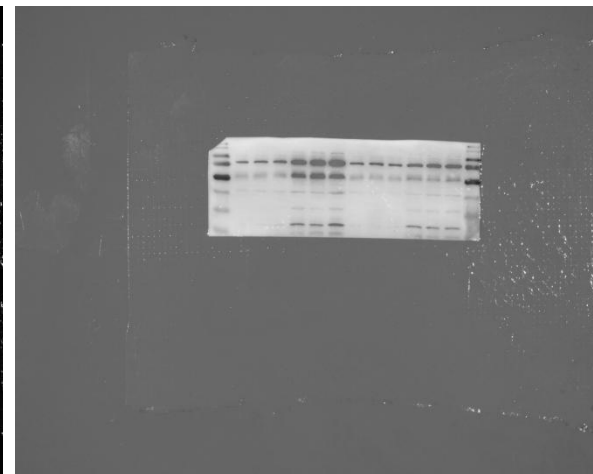

**Hsp90**

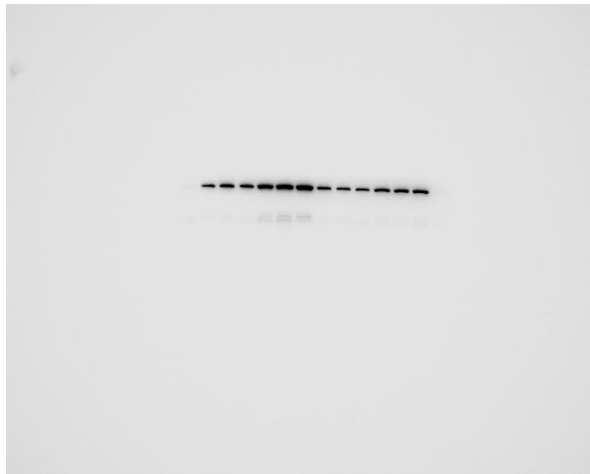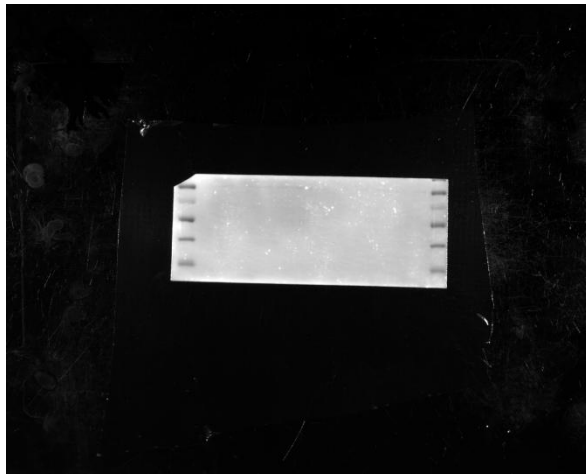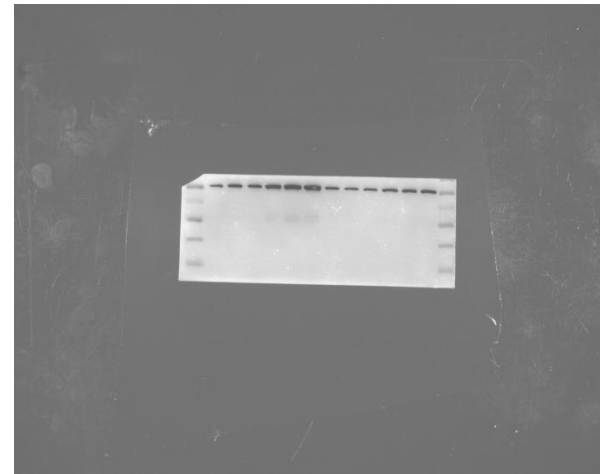

**FAM134B**

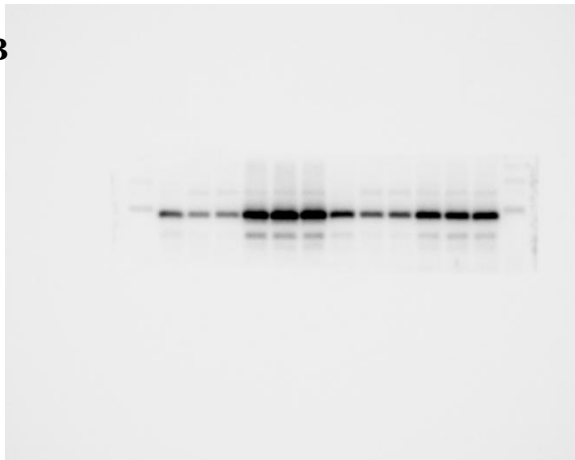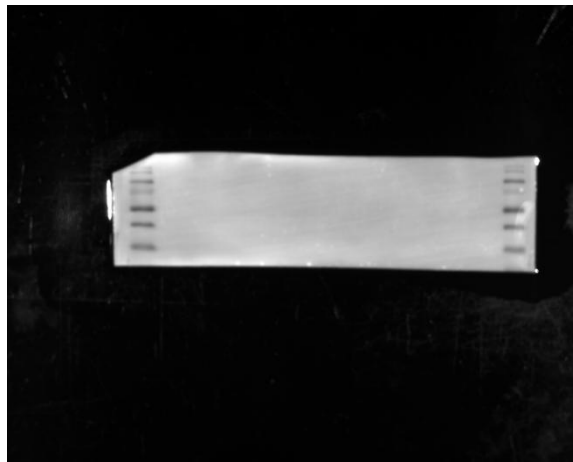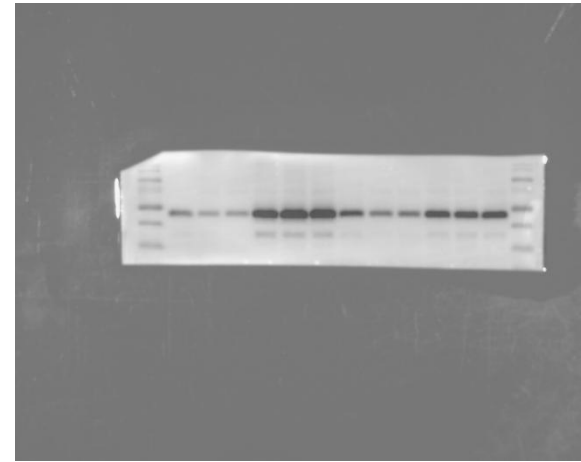

**$\beta$ -actin**

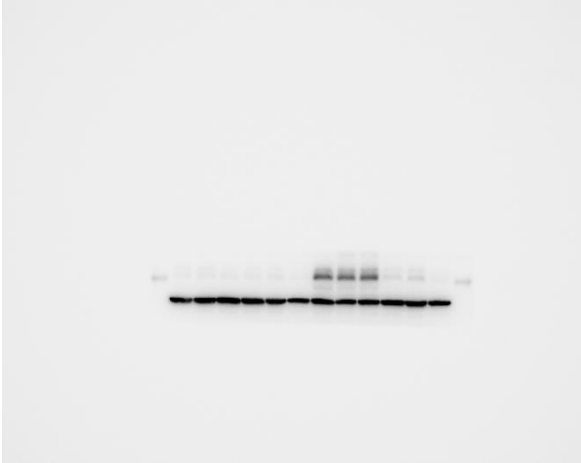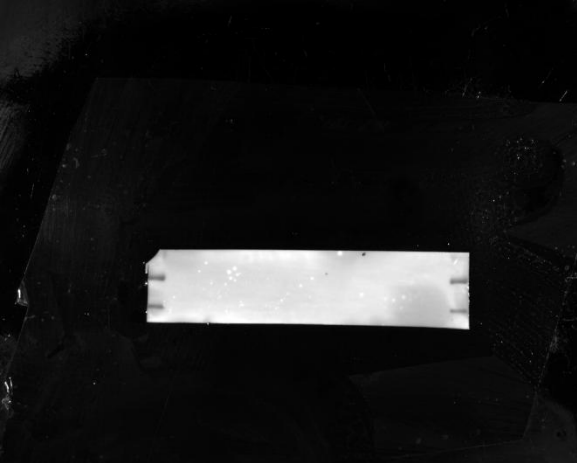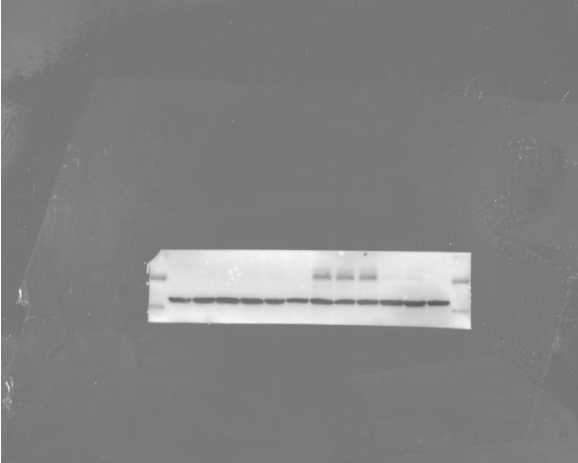

# Figure 7

**D**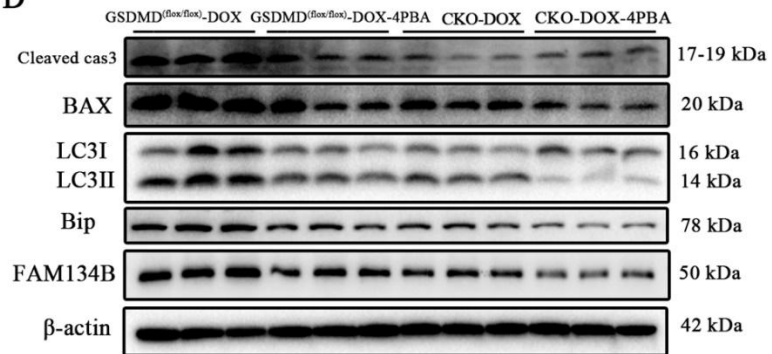**CC3**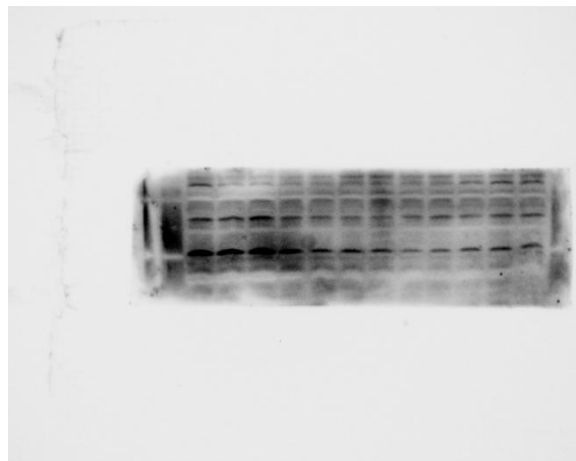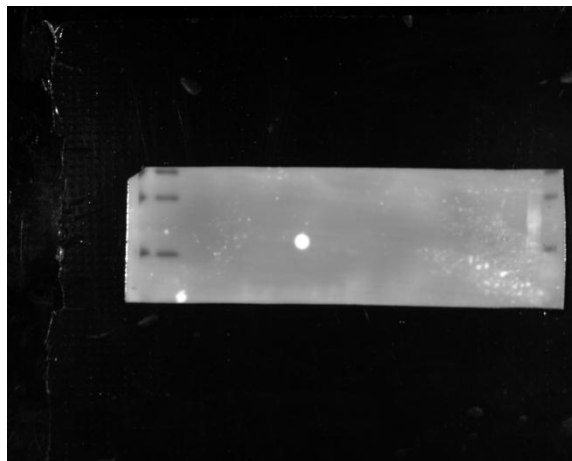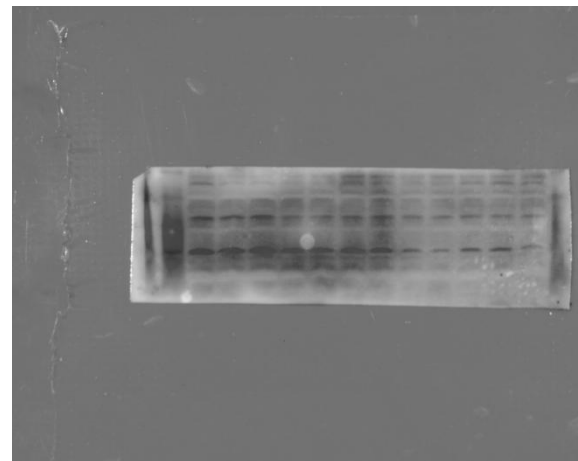

**BAX**

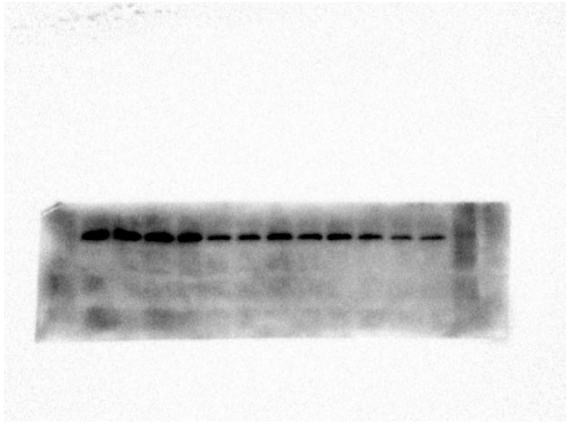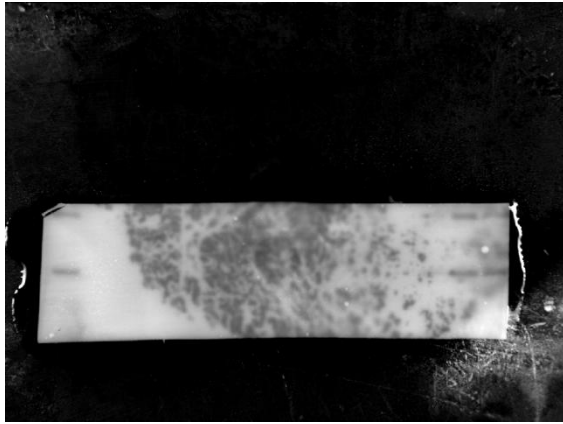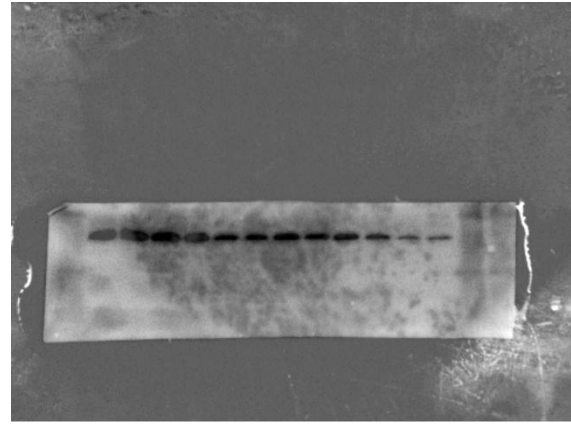

**LC3**

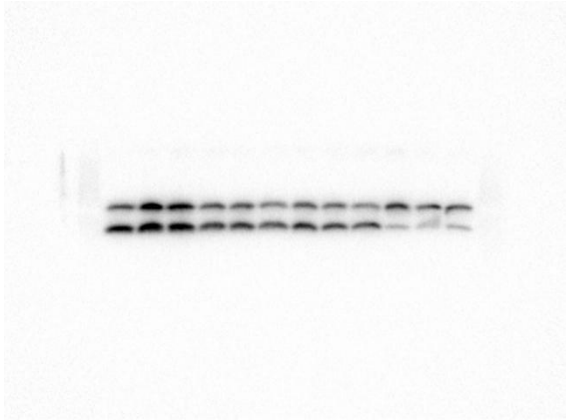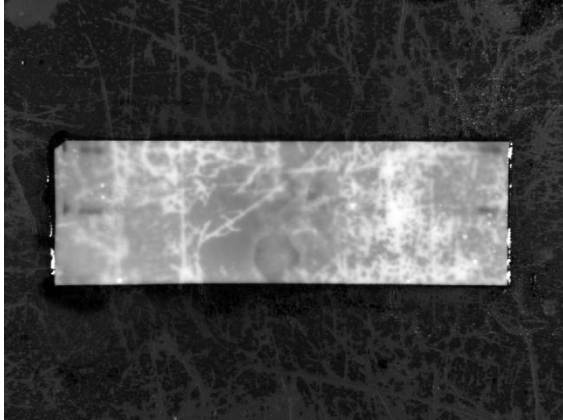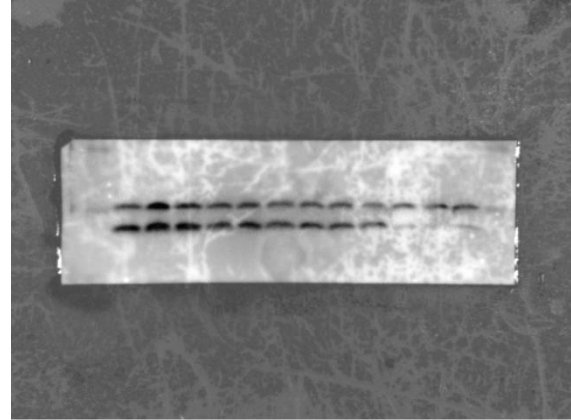



**BIP**

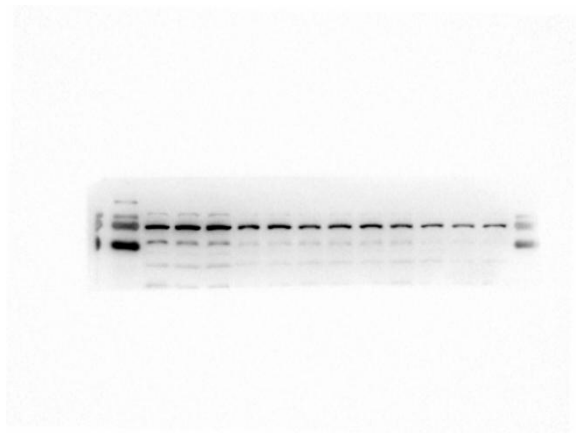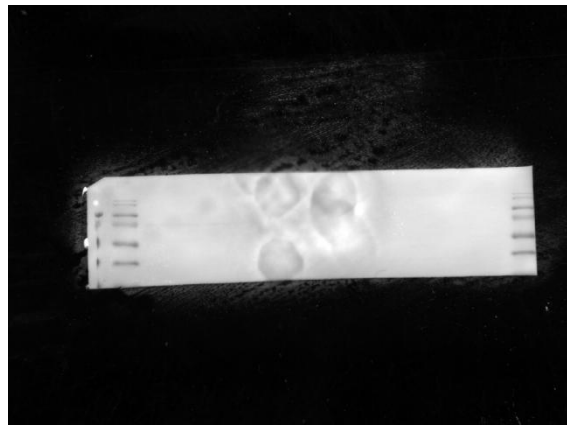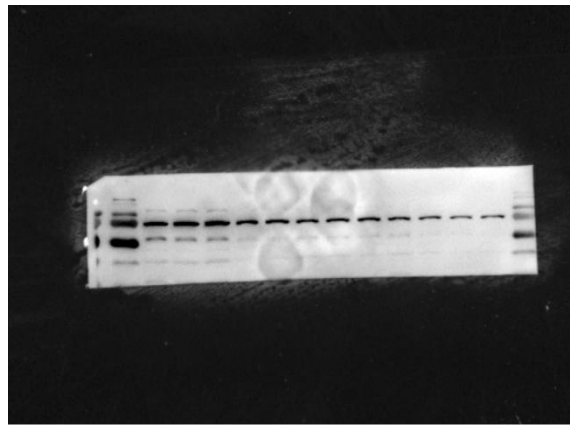

**FAM134B**

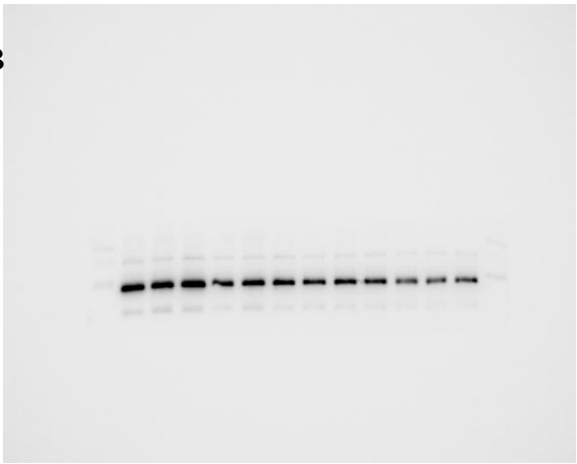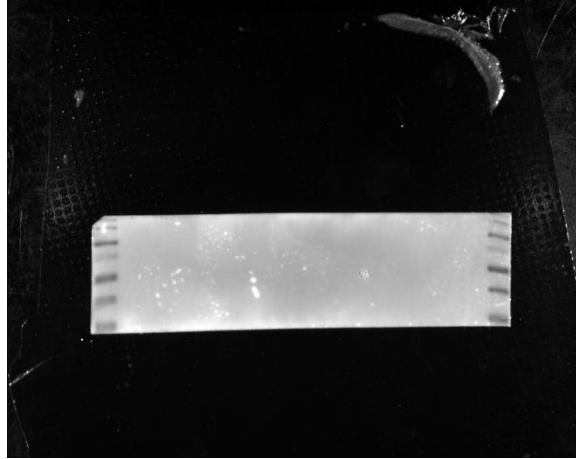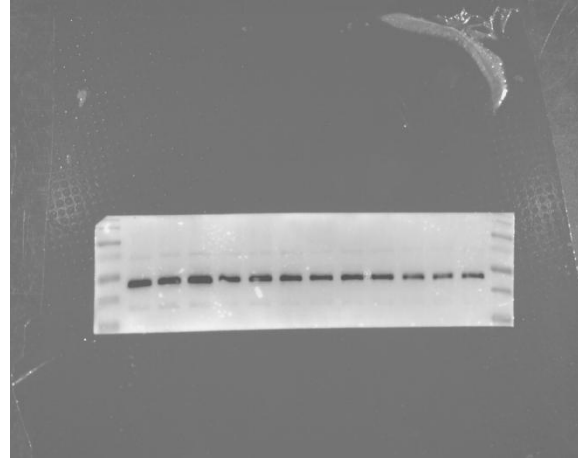

$\beta$ -actin

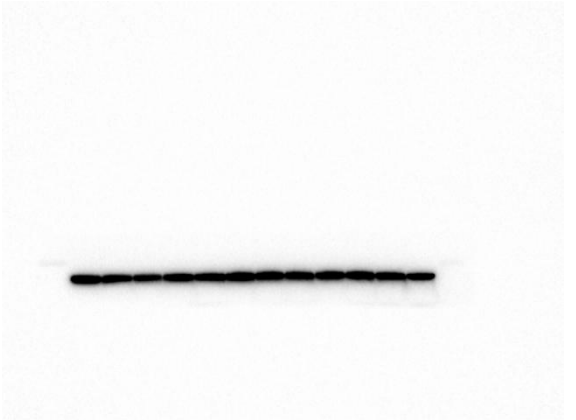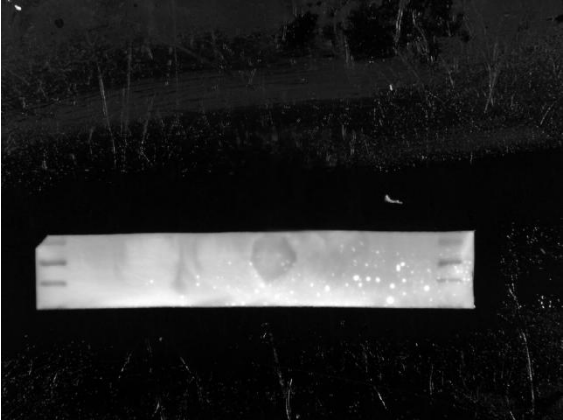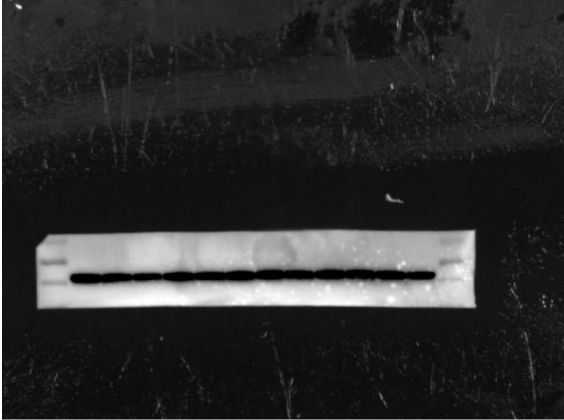

**F**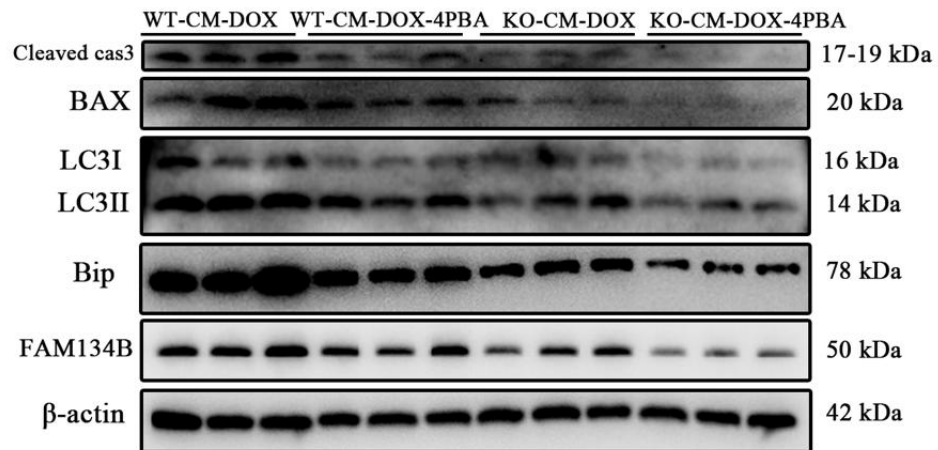**CC3**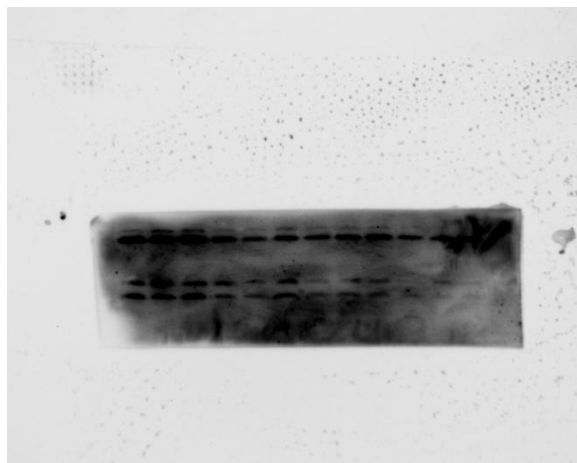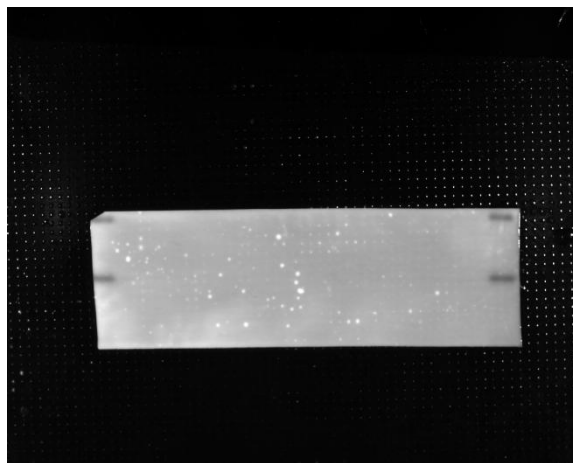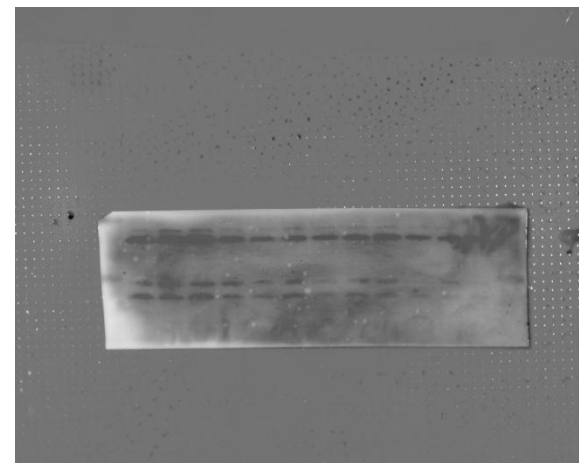

**BAX**

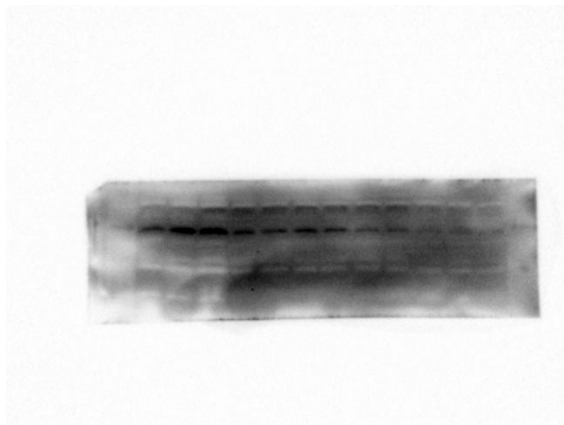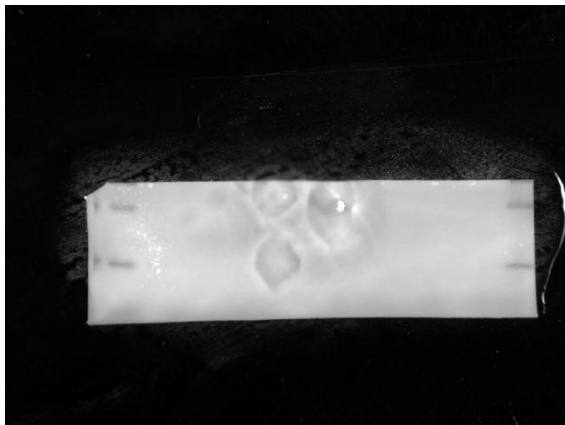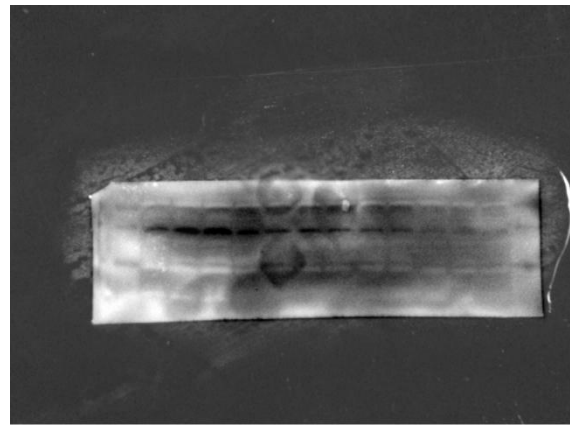

**LC3**

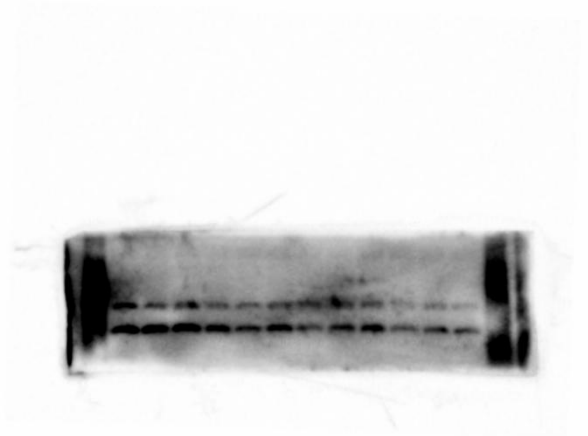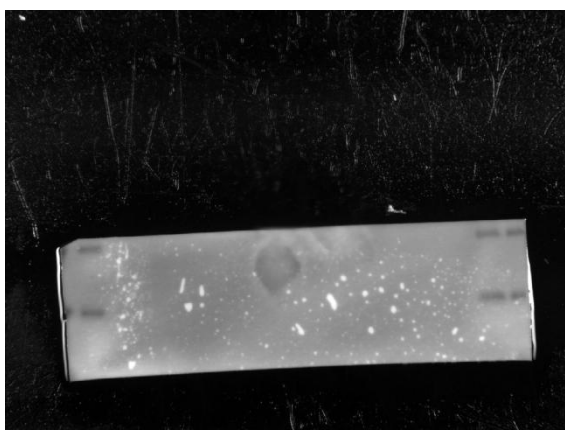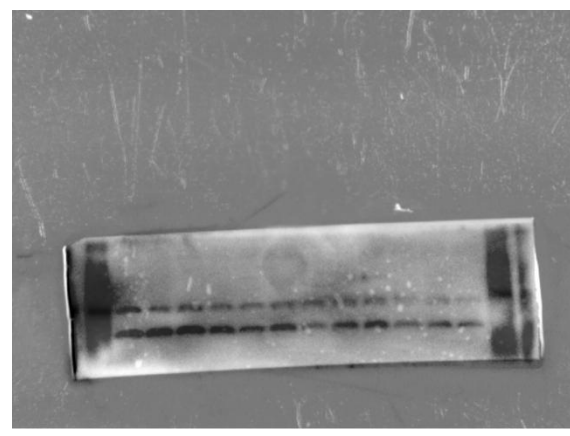

**Bip**

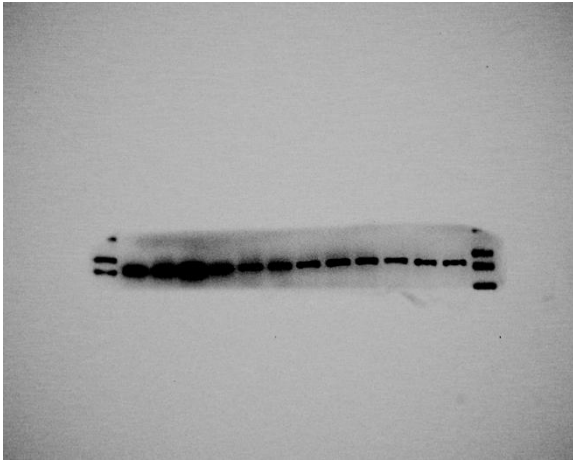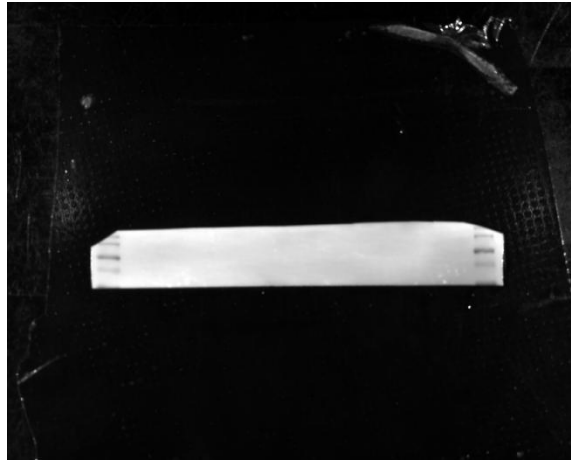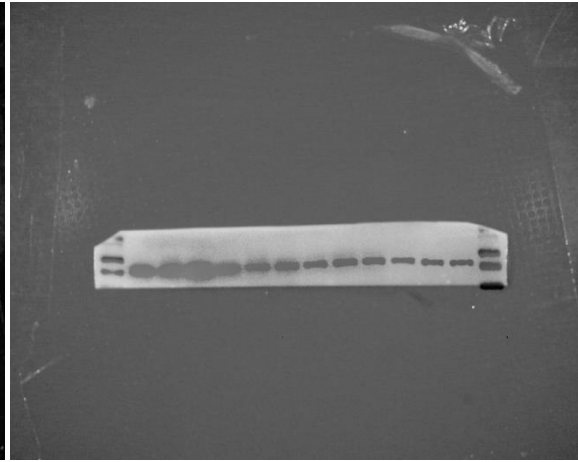

**FAM134B**

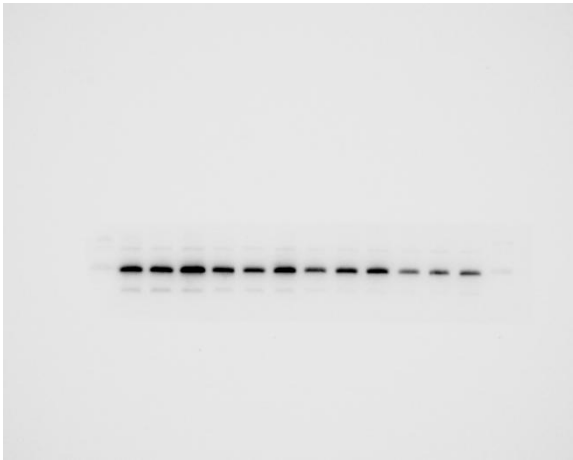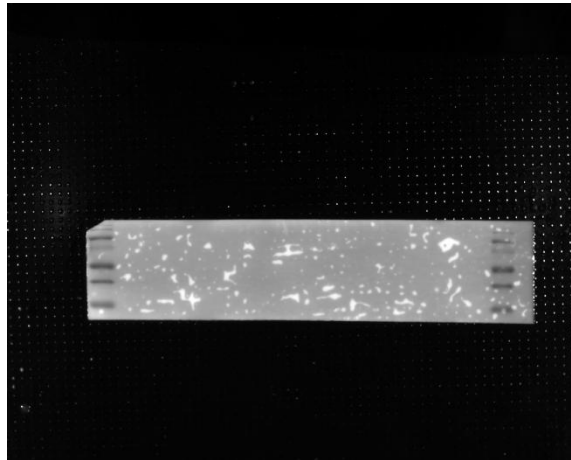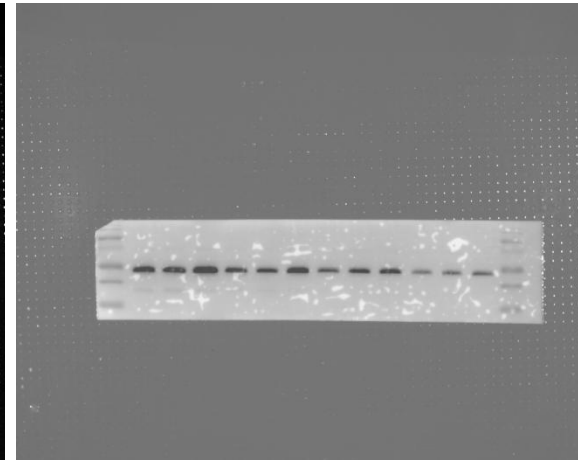

$\beta$ -actin

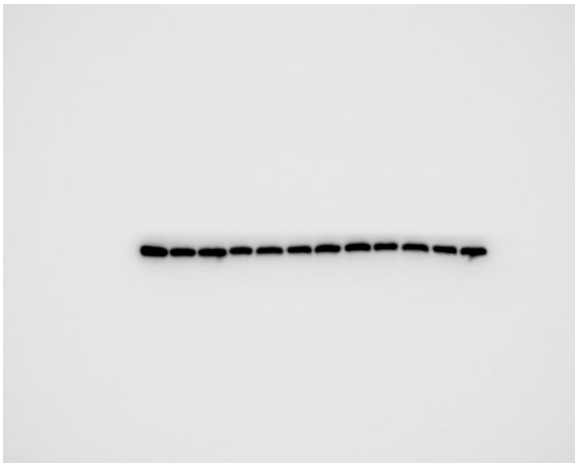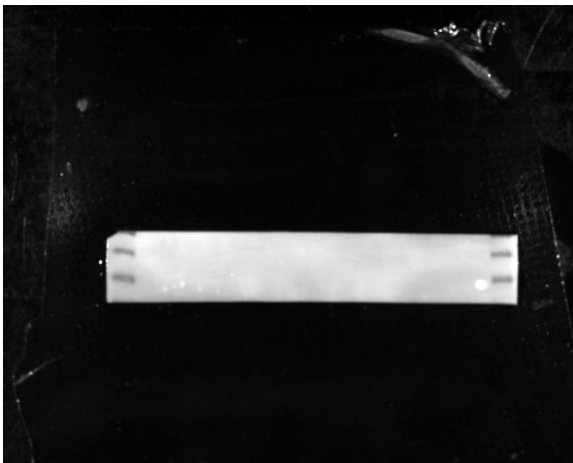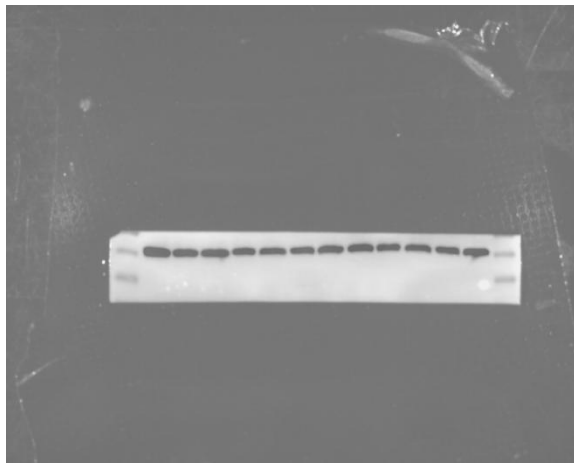

# Supplementary Figure 1

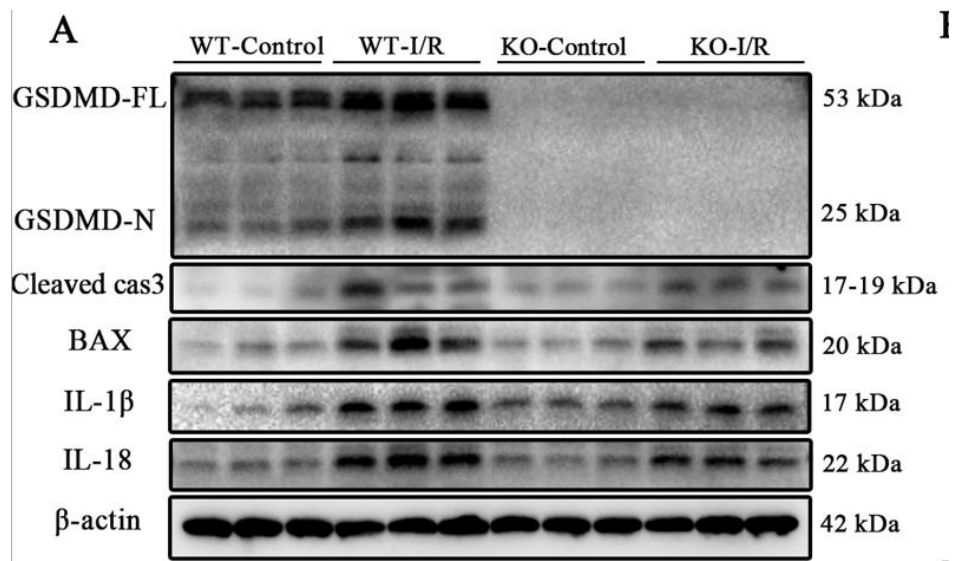

**I**

**GSDMD**

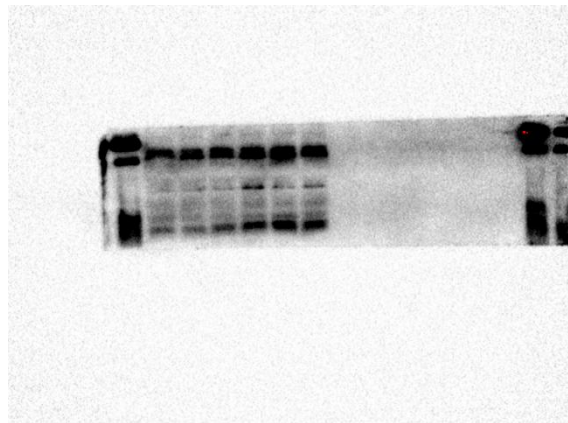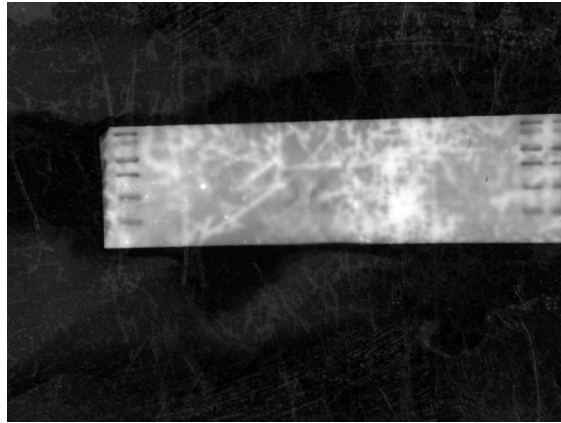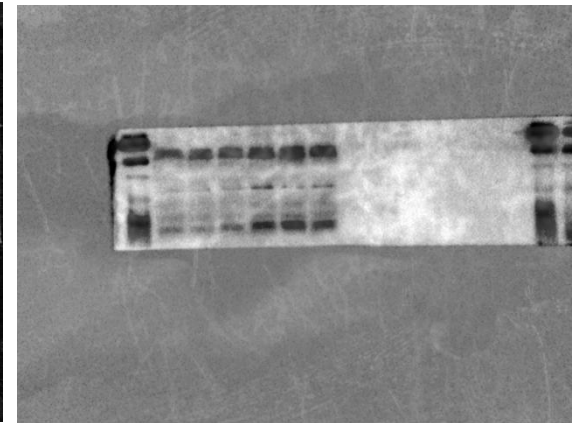



CC3

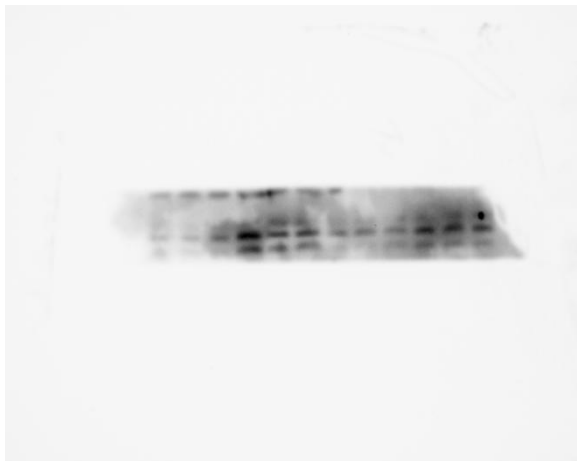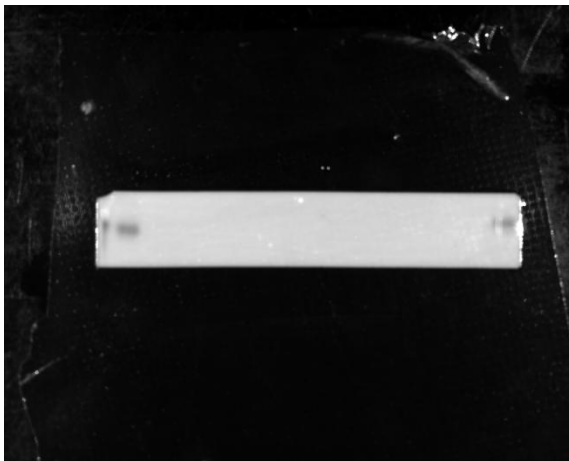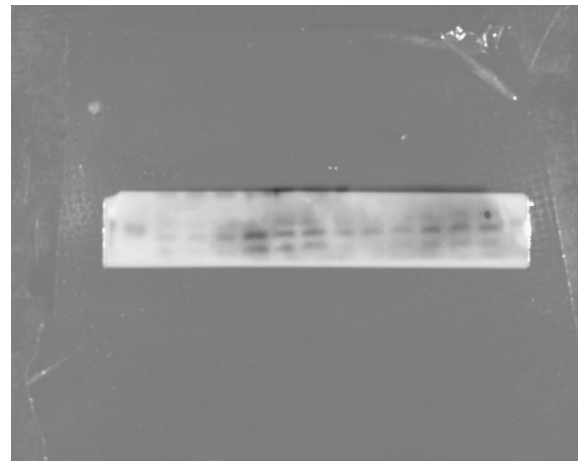

BAX

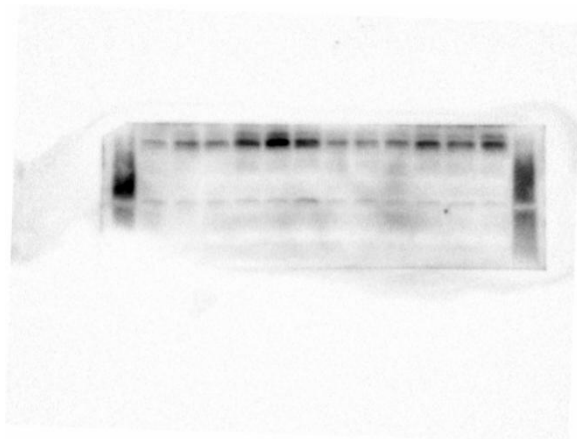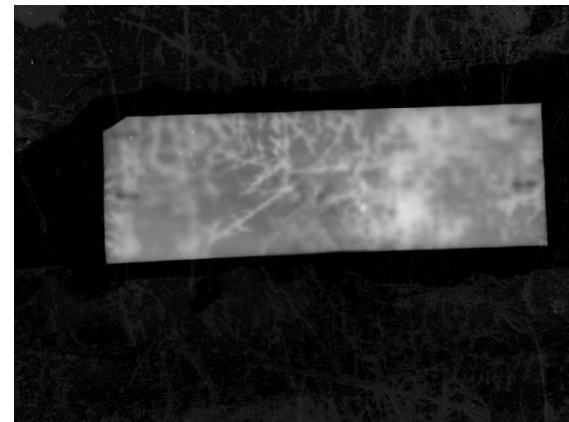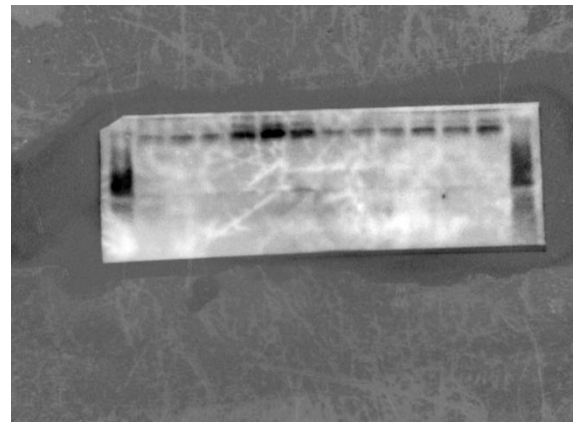

IL-1 $\beta$

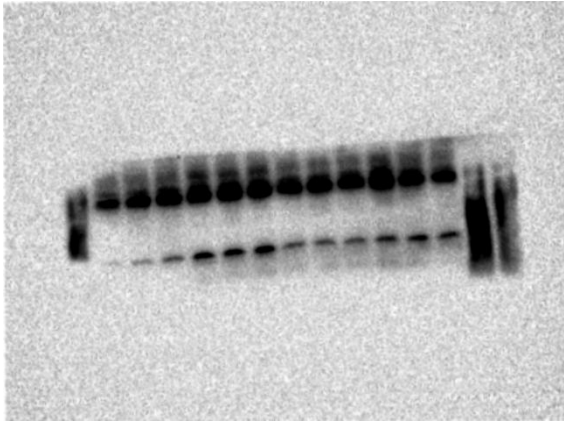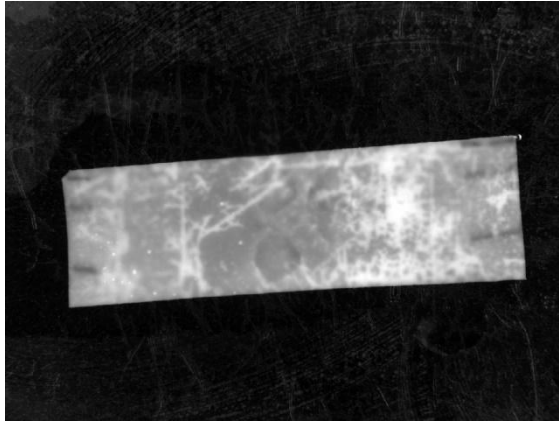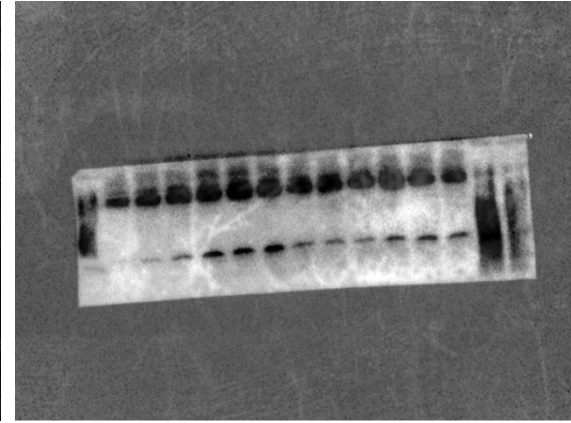

IL-18

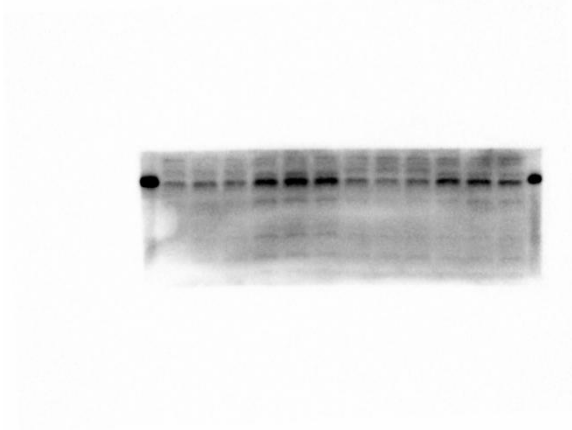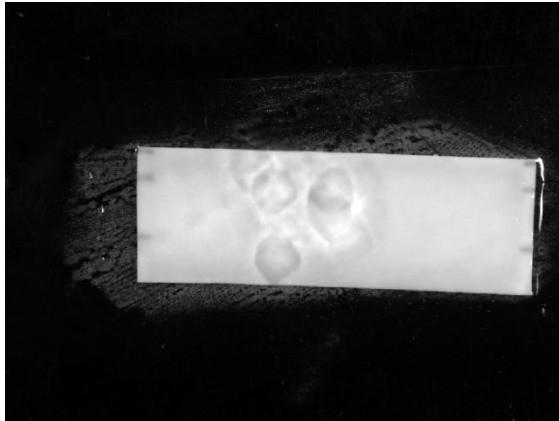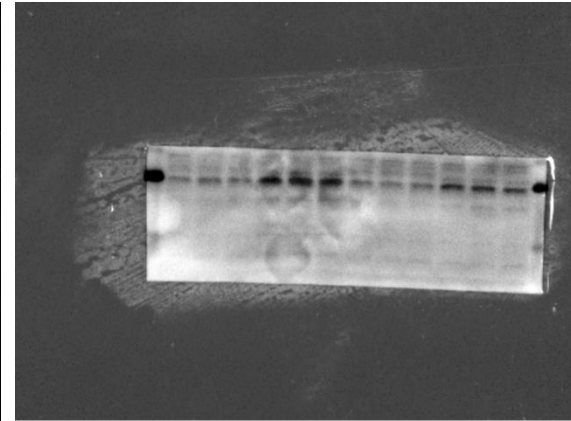

$\beta$ -actin

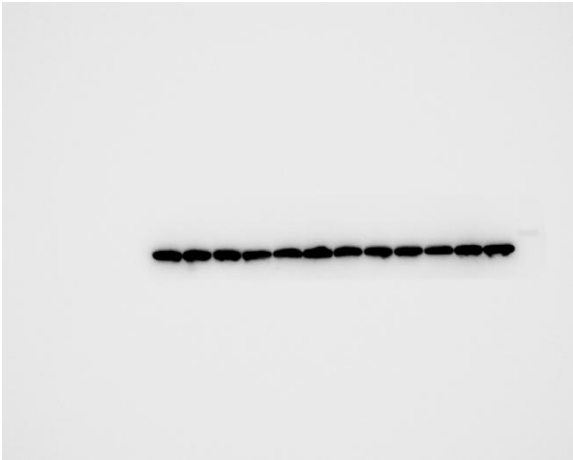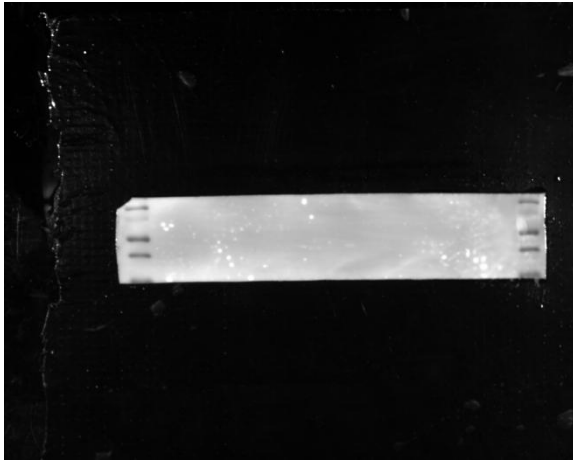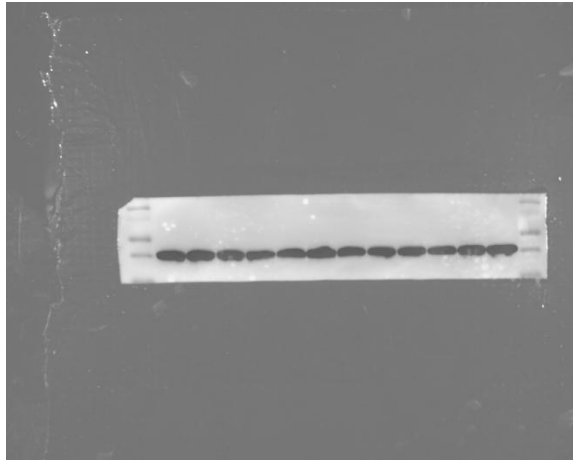

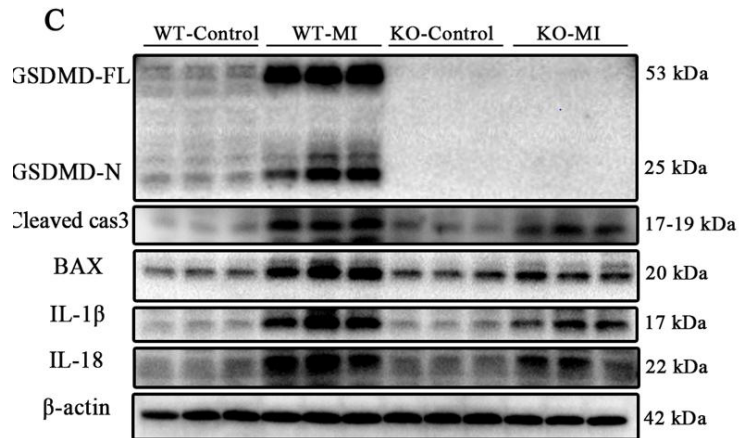

**GSDMD**

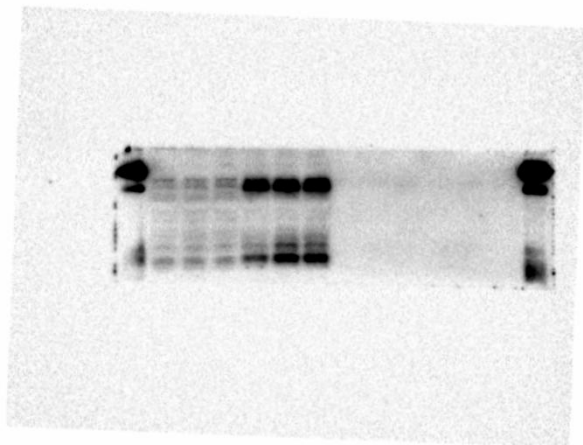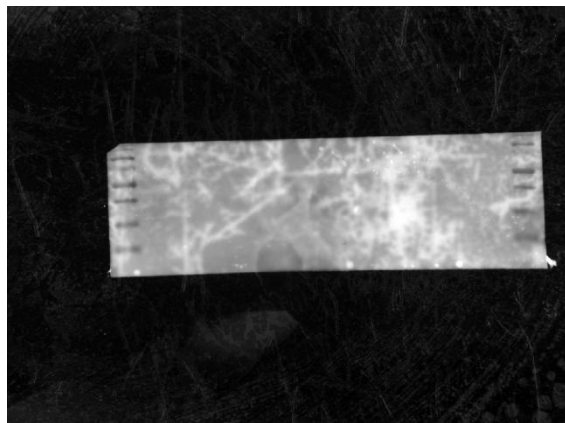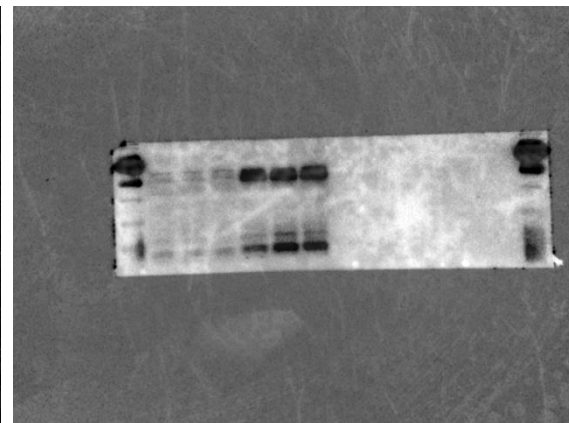

CC3

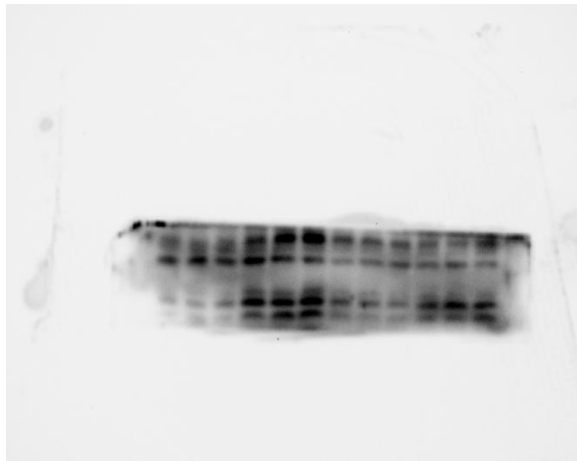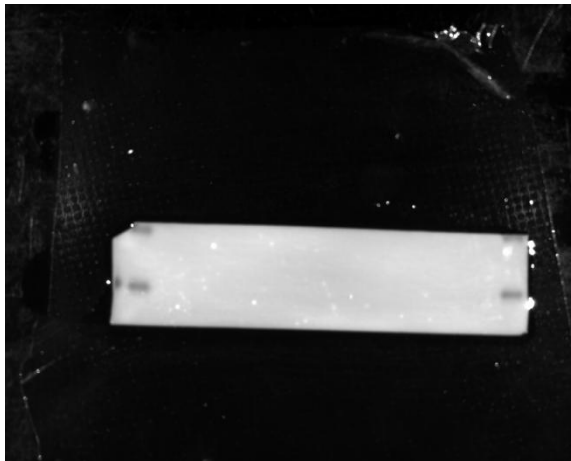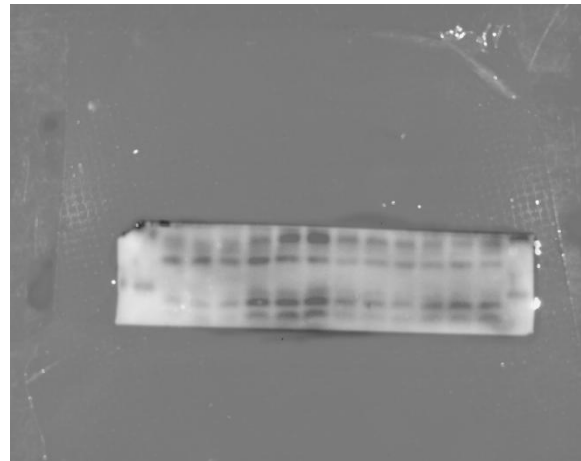

BAX

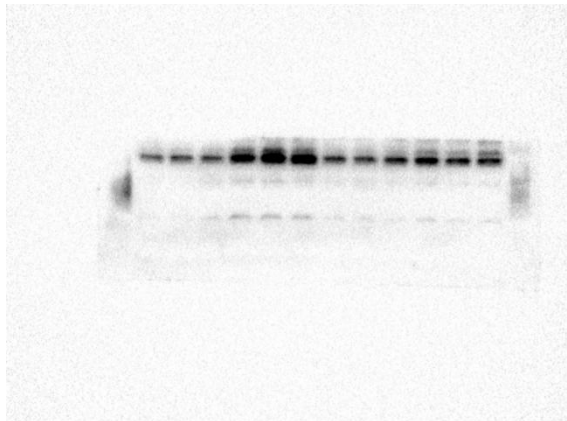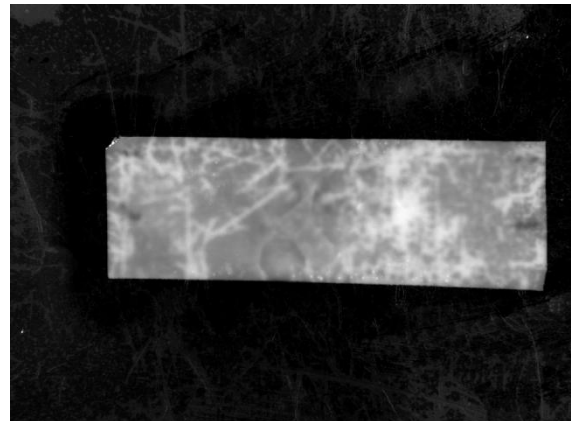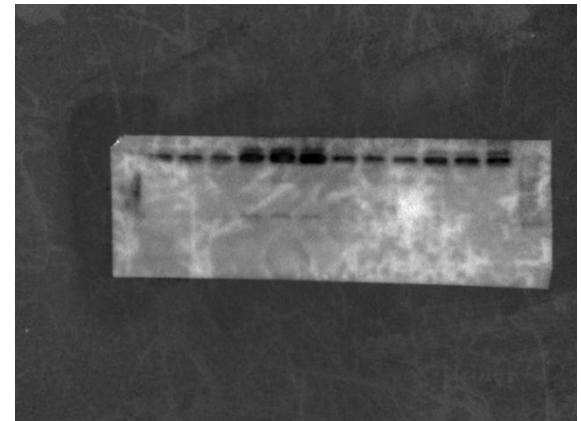

IL-1 $\beta$

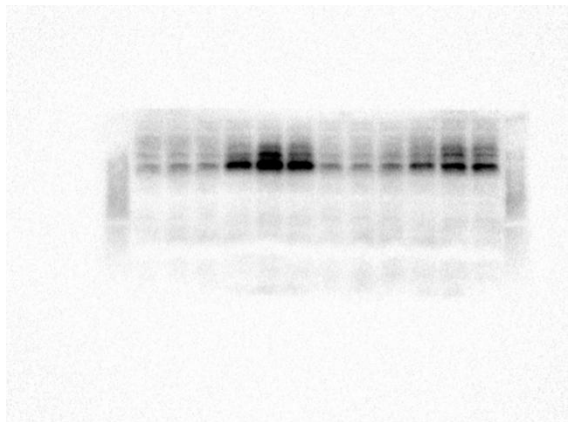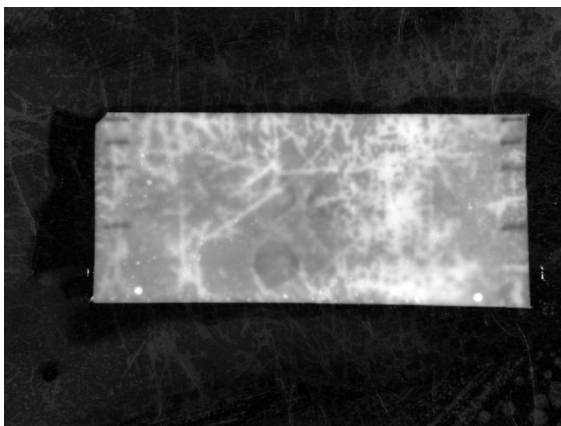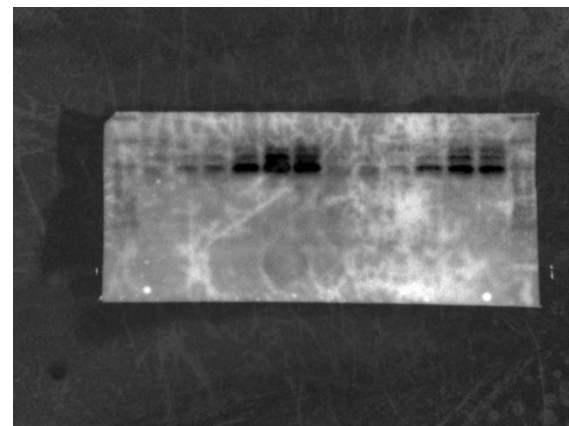

IL-18

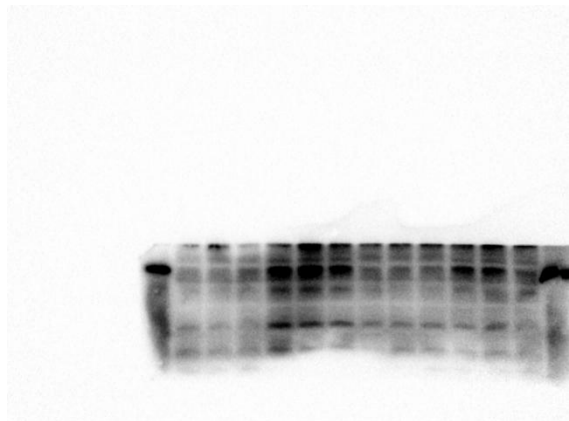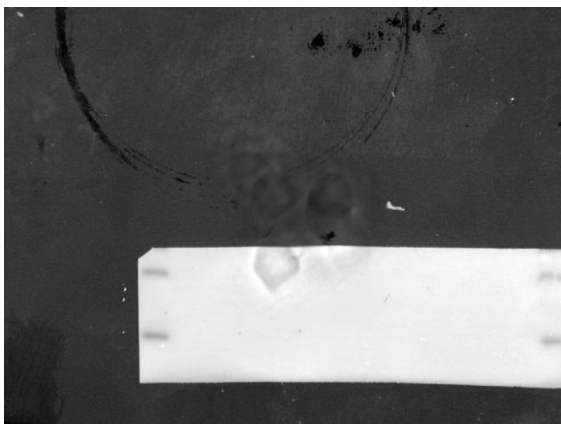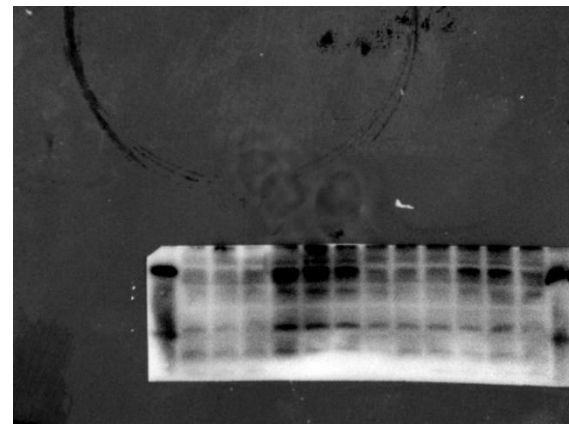

**$\beta$ -actin**

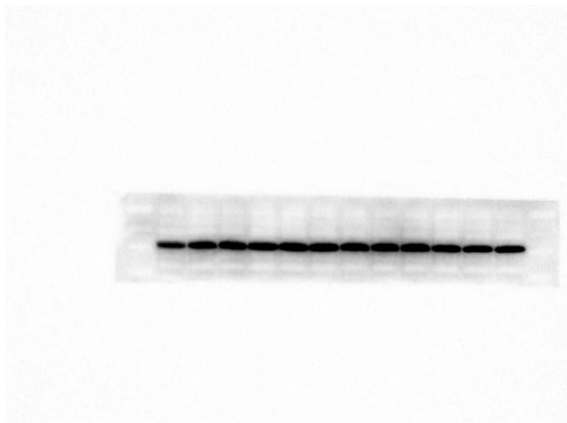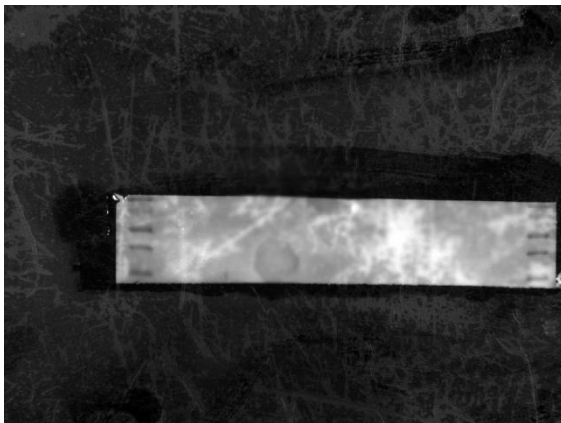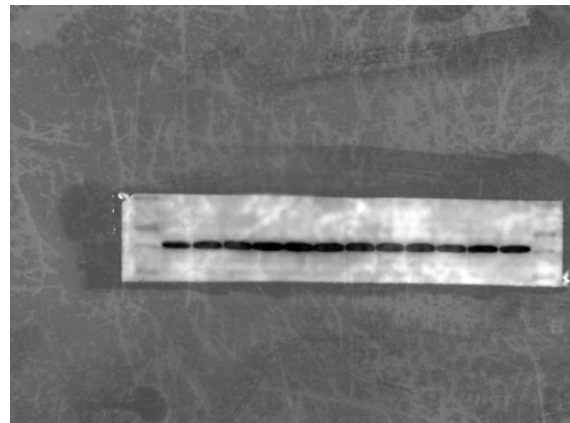

# Supplementary Figure 2



H

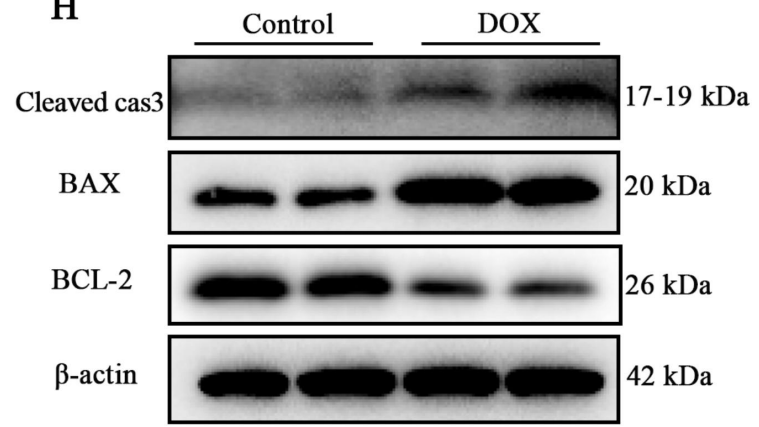

CC3

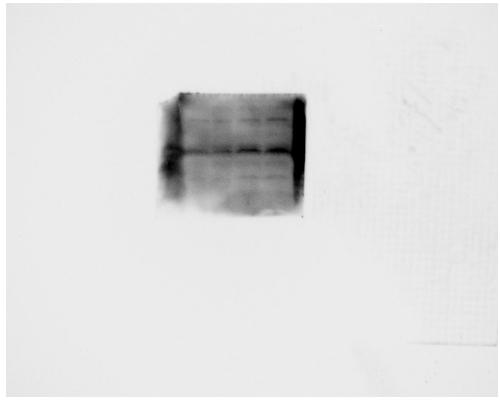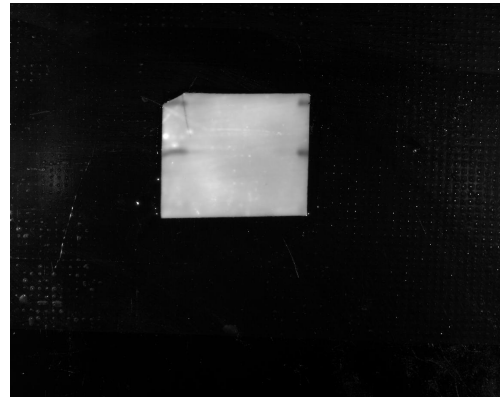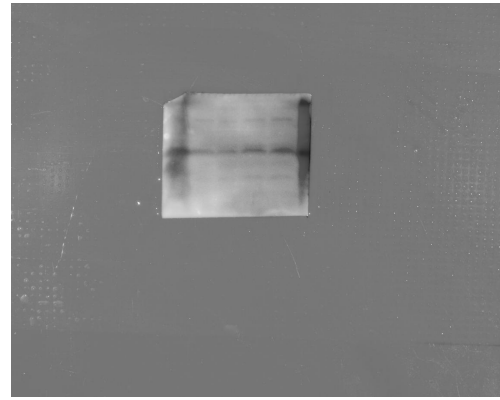

**BAX**

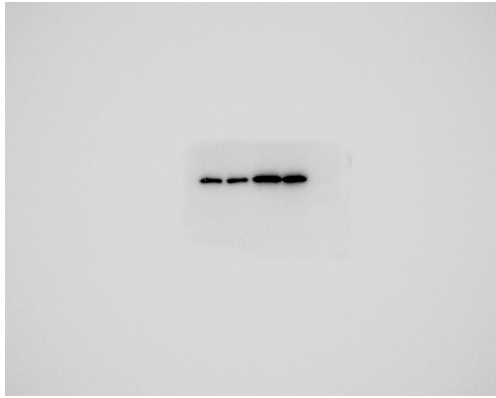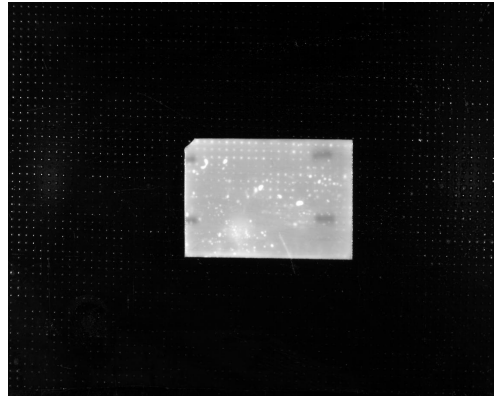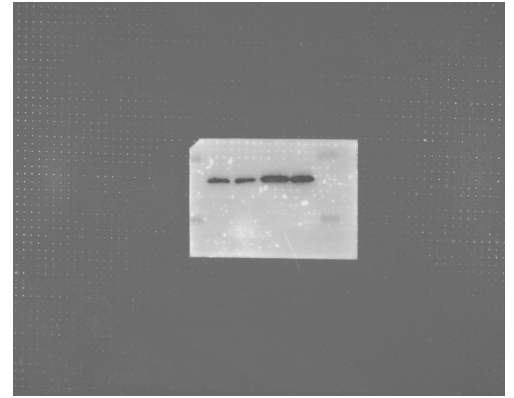

**BCL-2**

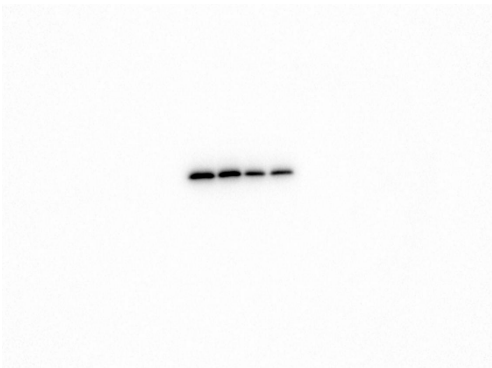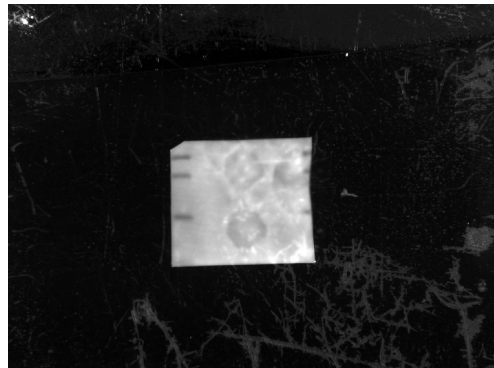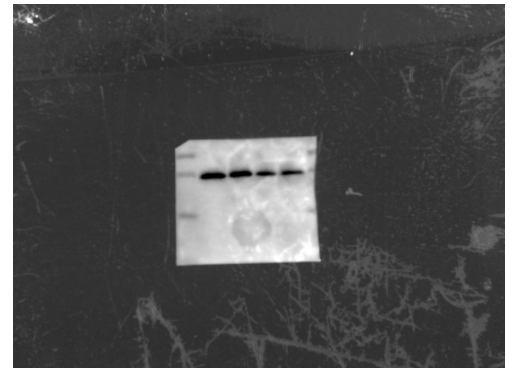

**$\beta$ -actin**

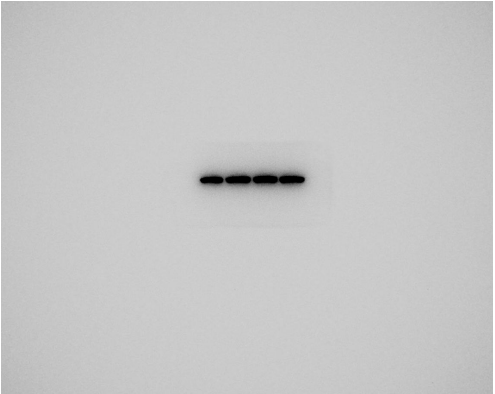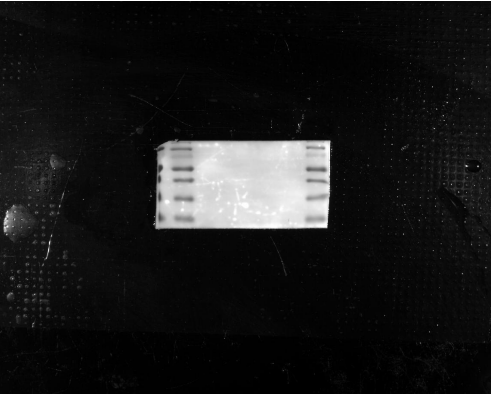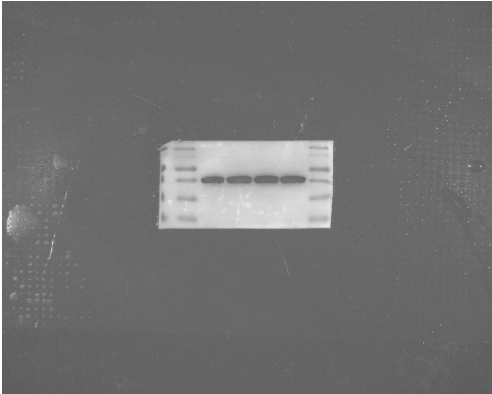

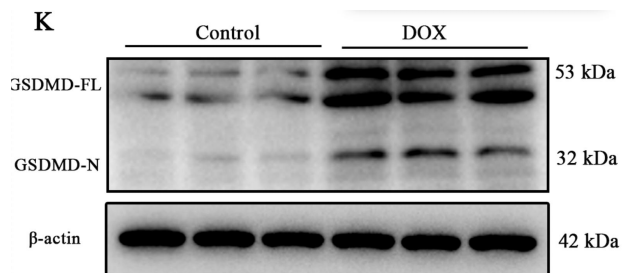

**GSDMD**

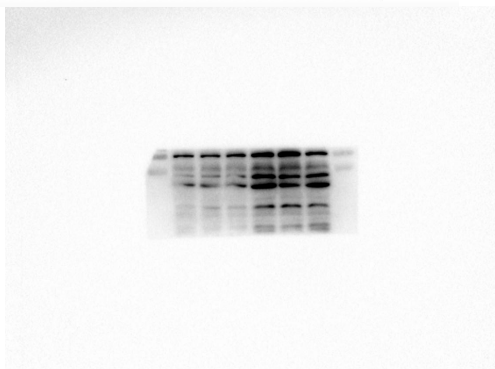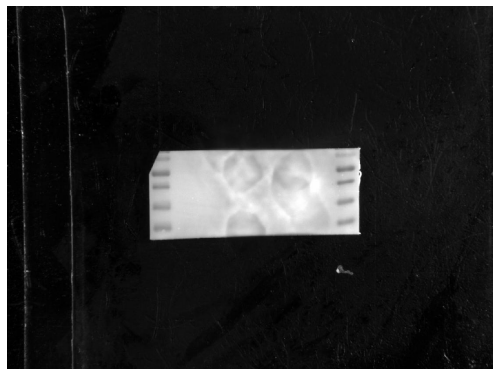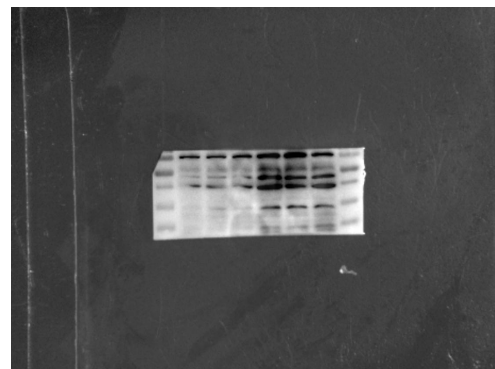

**$\beta$ -actin**

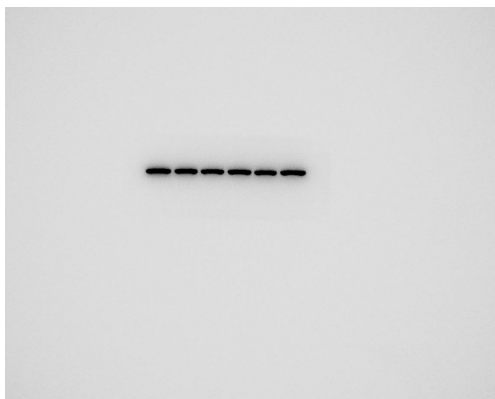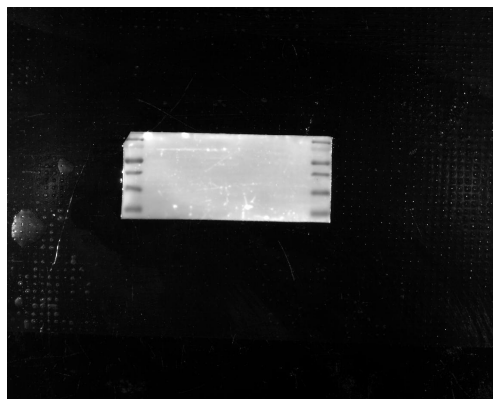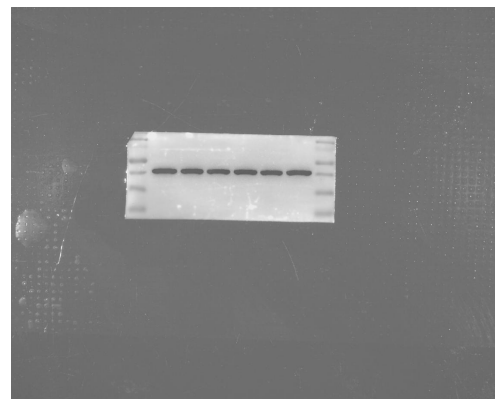

# Supplementary Figure 3

**A**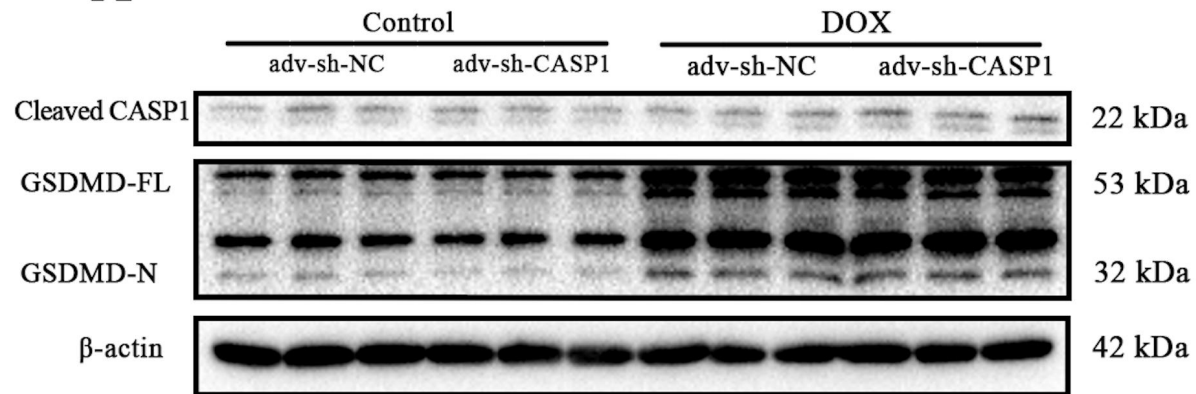**Cleaved CASP1**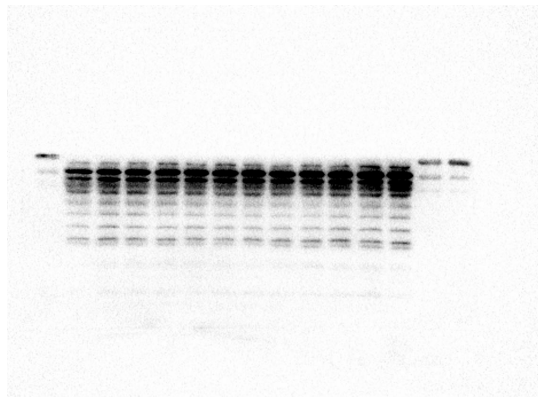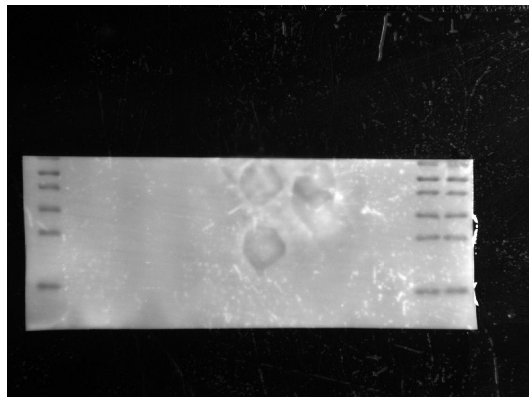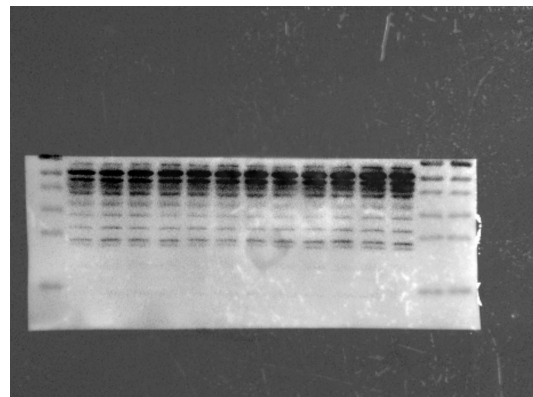

**GSDMD**

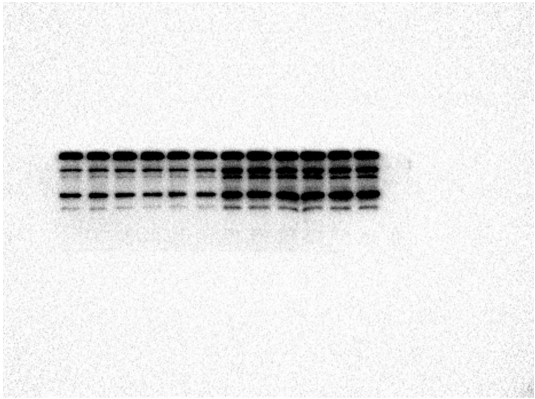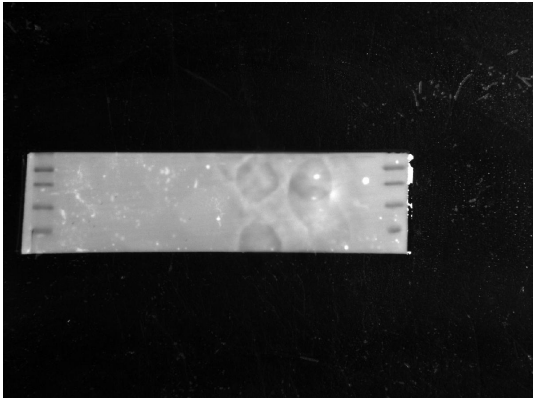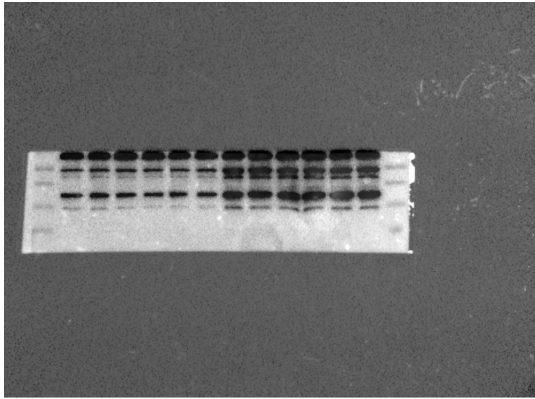

**$\beta$ -actin**

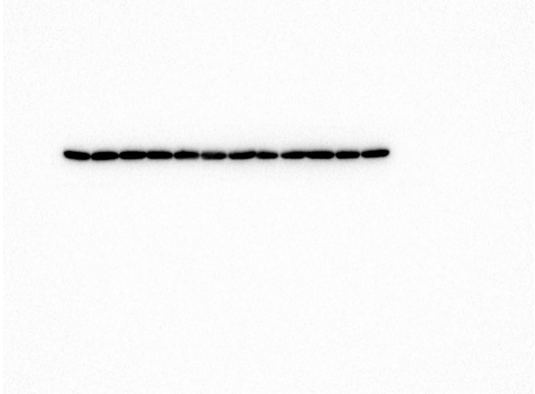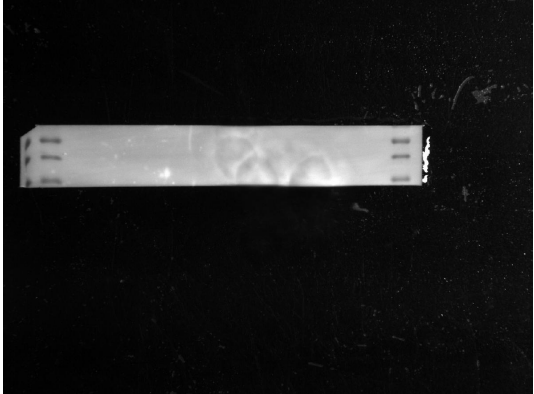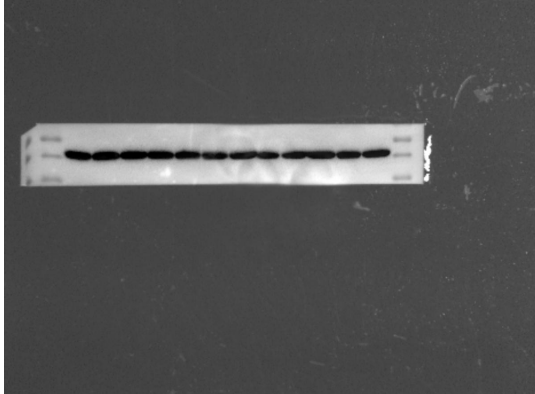

**B**

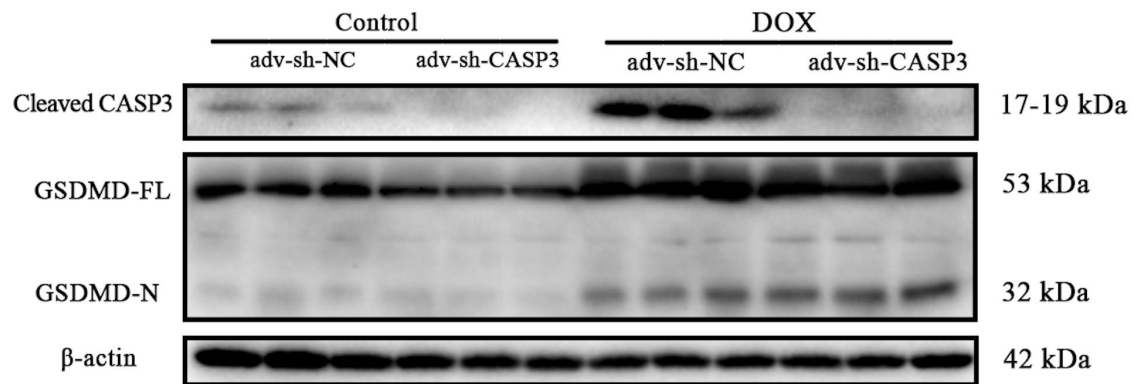

**Cleaved CASP3**

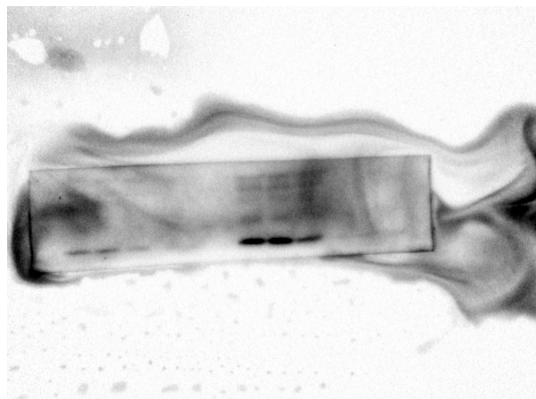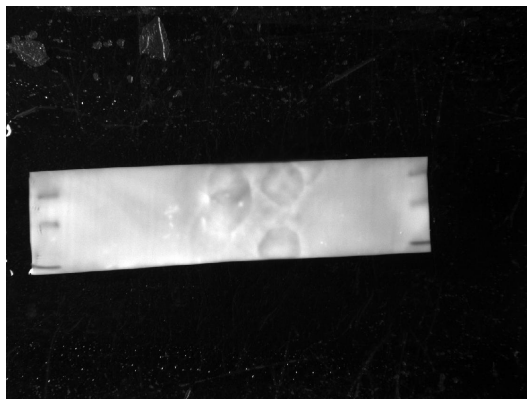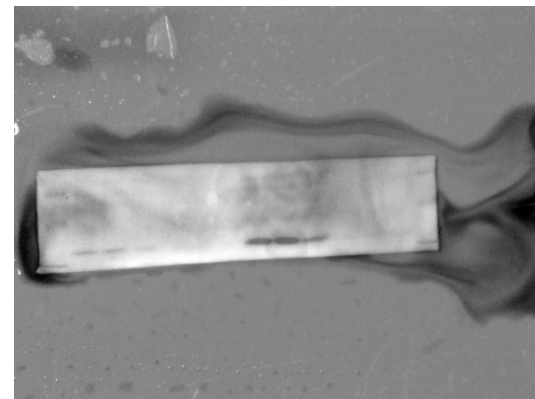



**GSDMD**

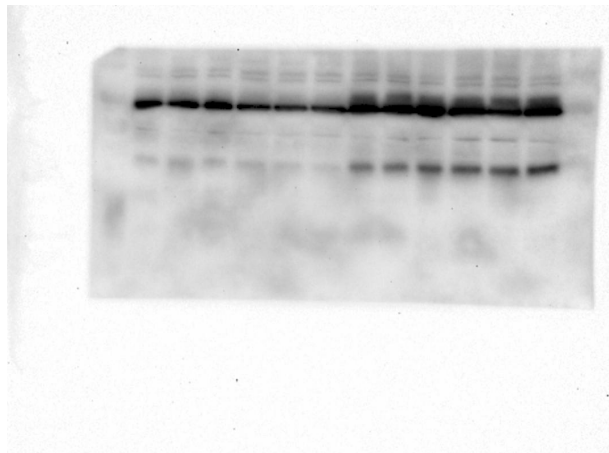

**$\beta$ -actin**

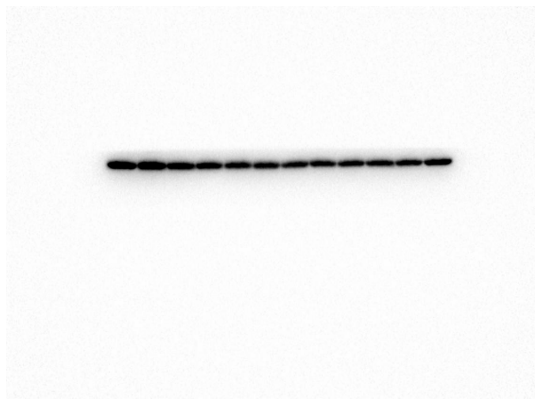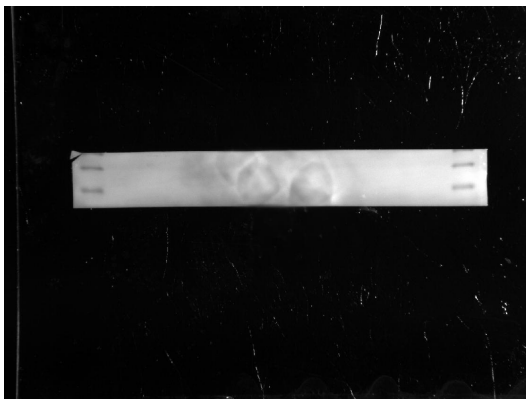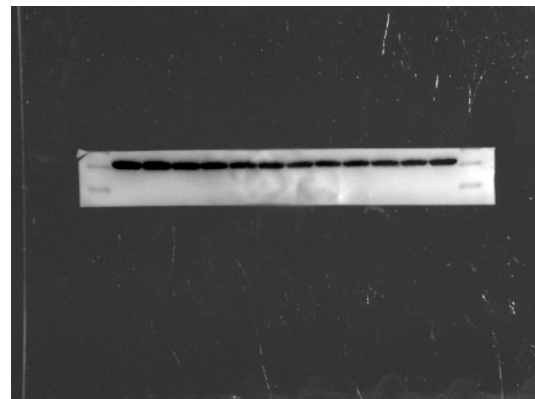

# C

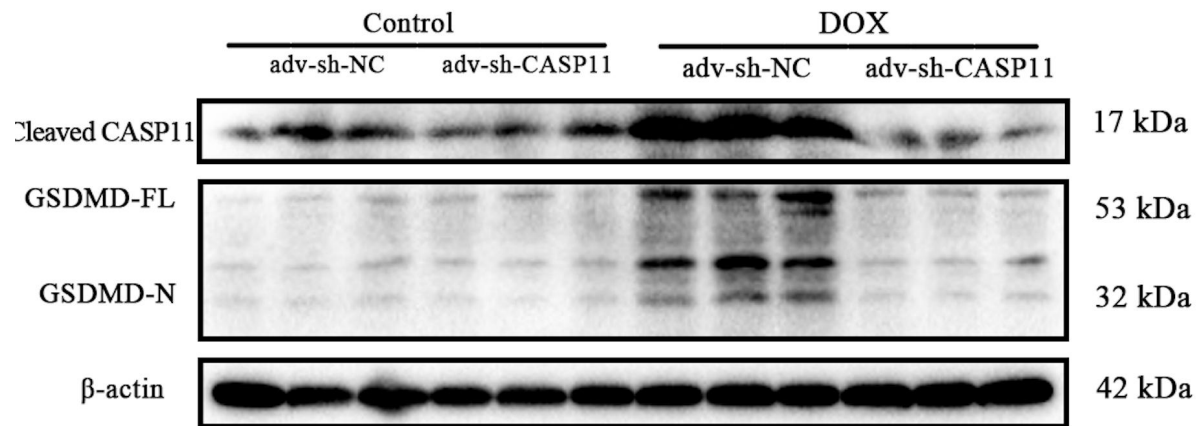

Cleaved CASP11

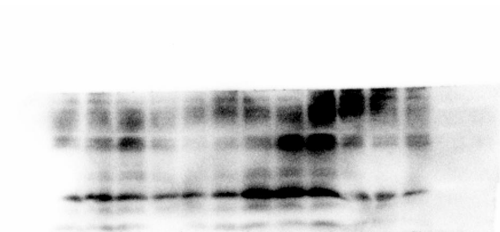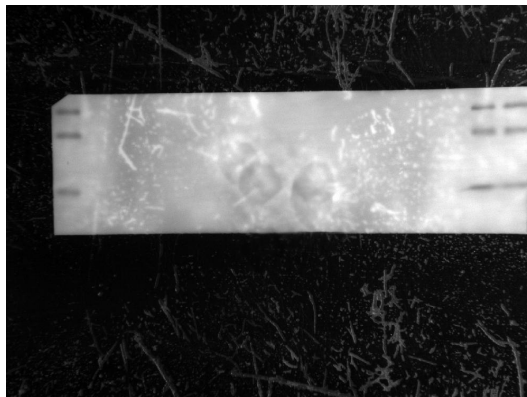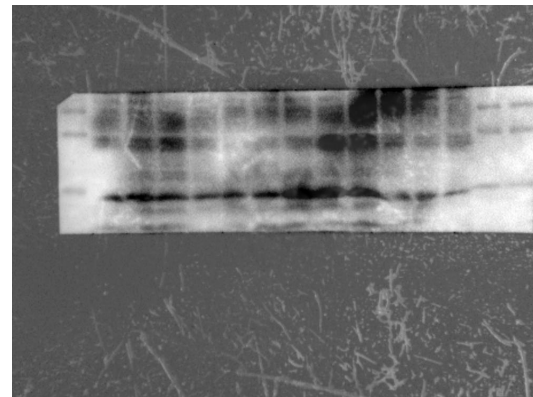

**GSDMD**

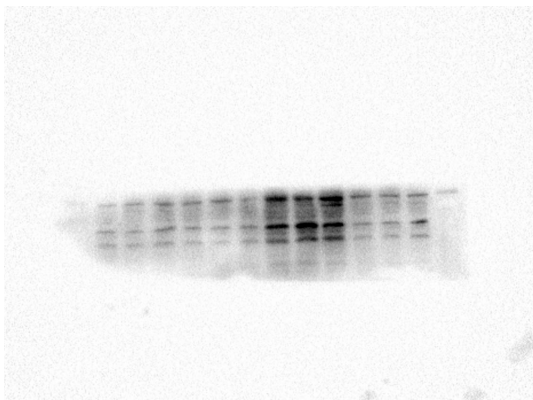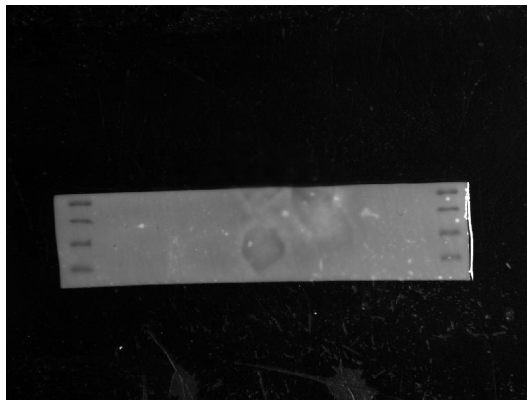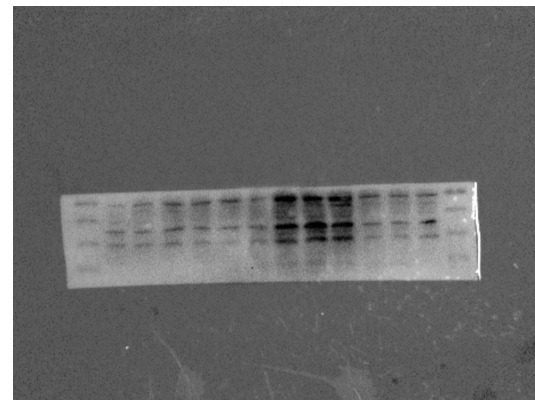

**$\beta$ -actin**

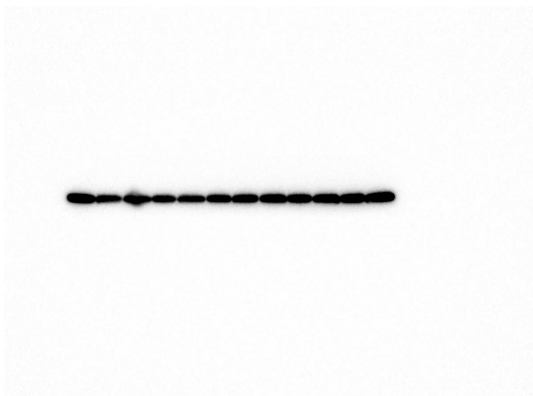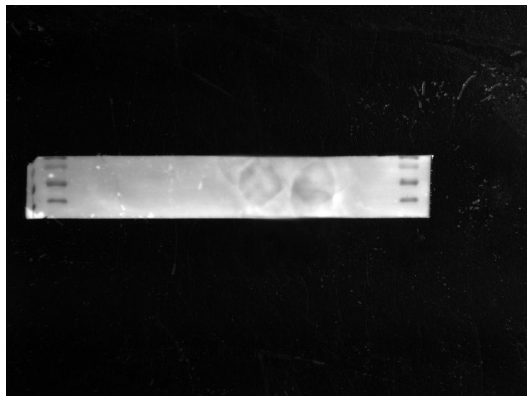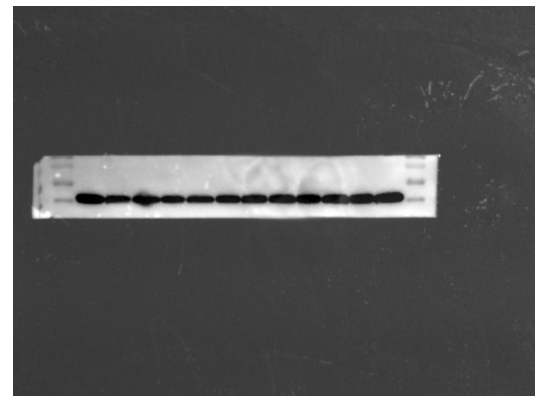

# Supplementary Figure 4

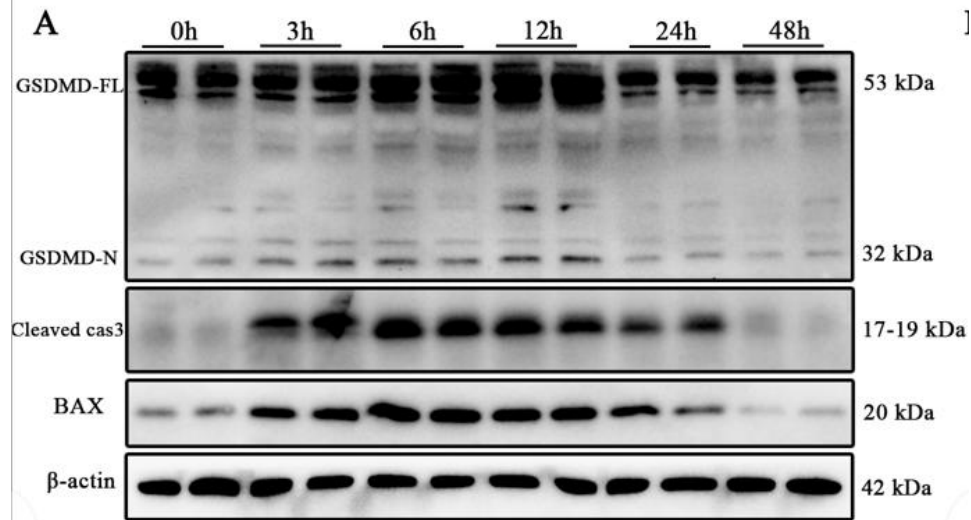

**GSDMD**

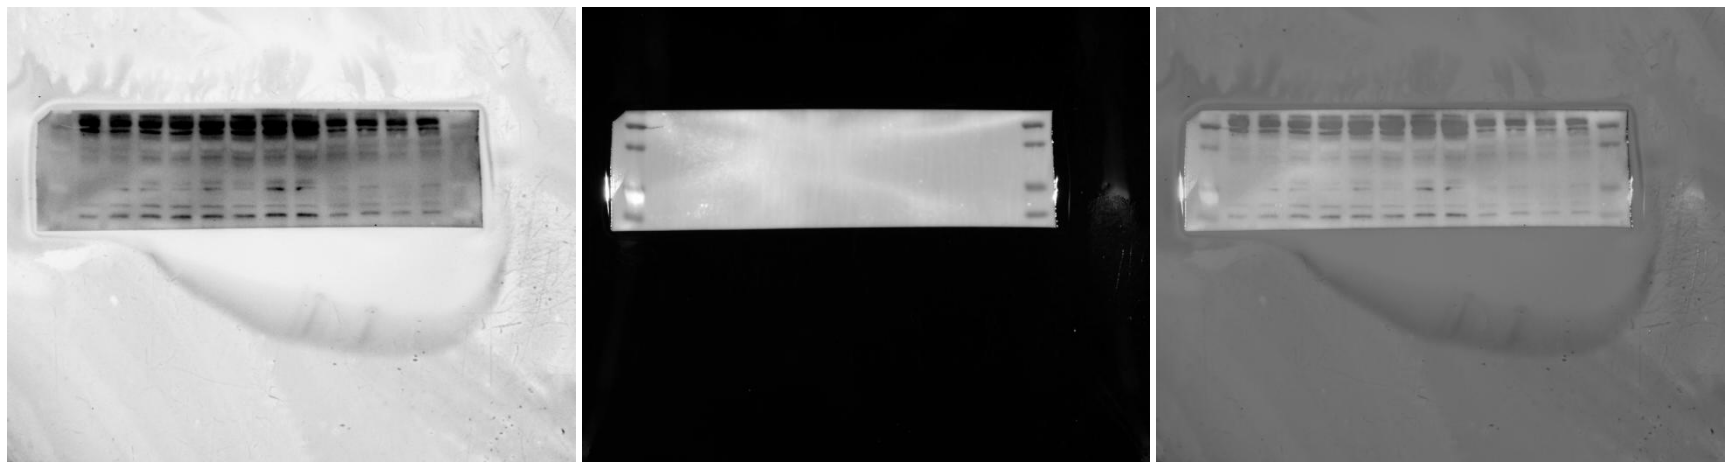

**BAX**

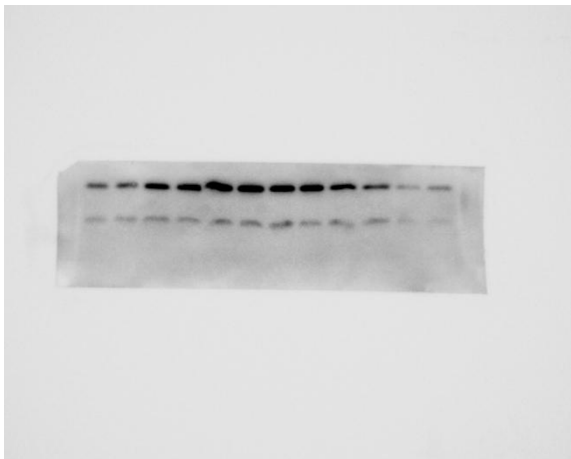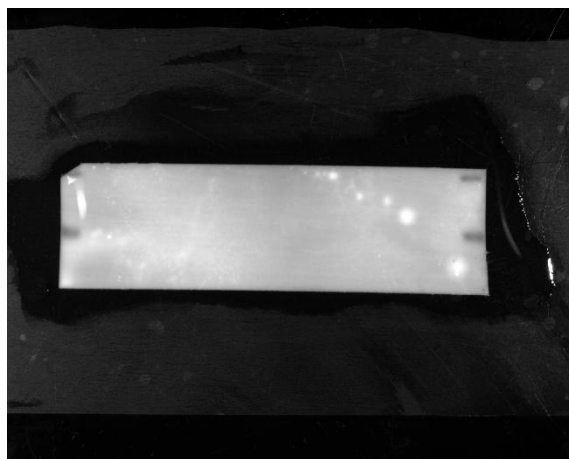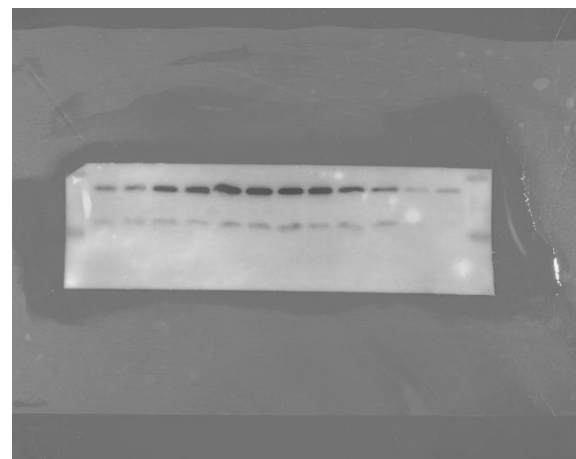

**CC3**

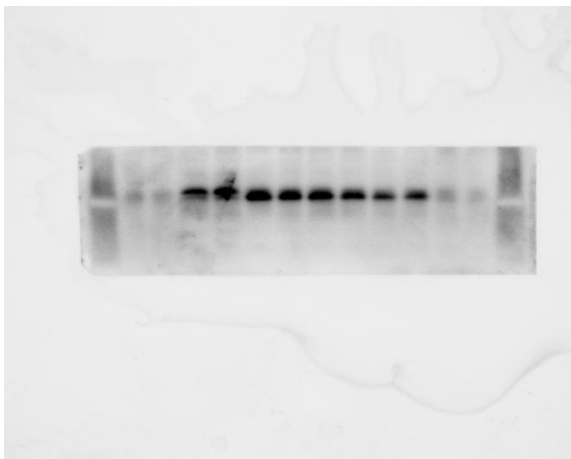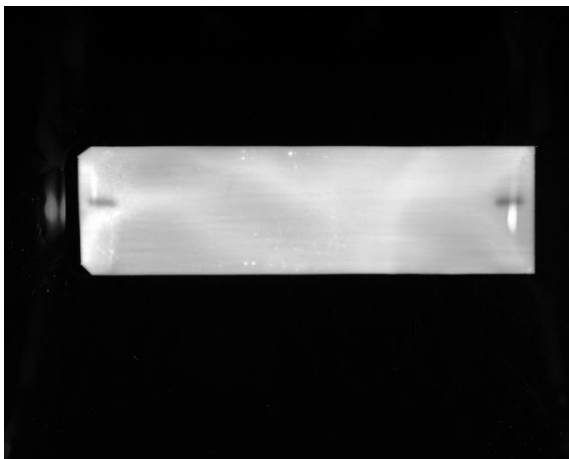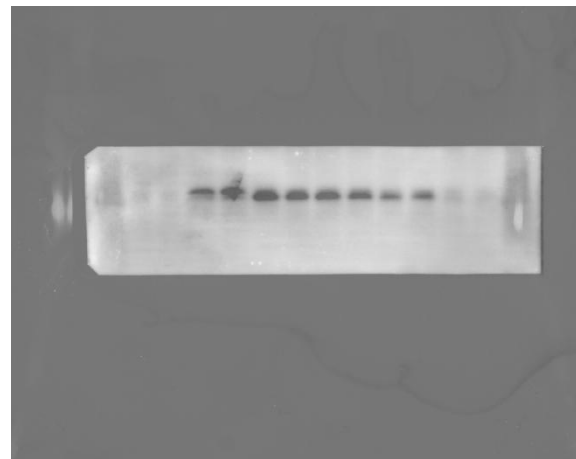

**$\beta$ -actin**

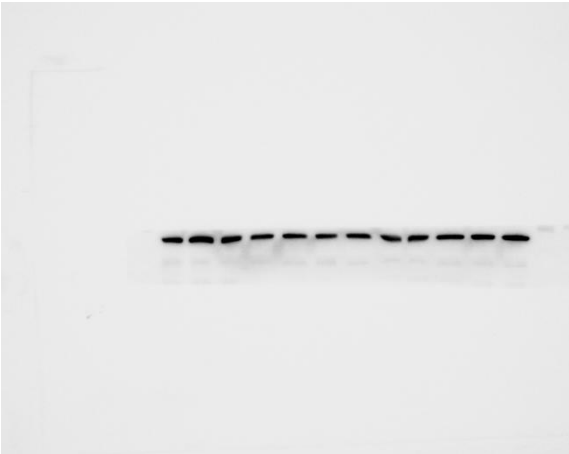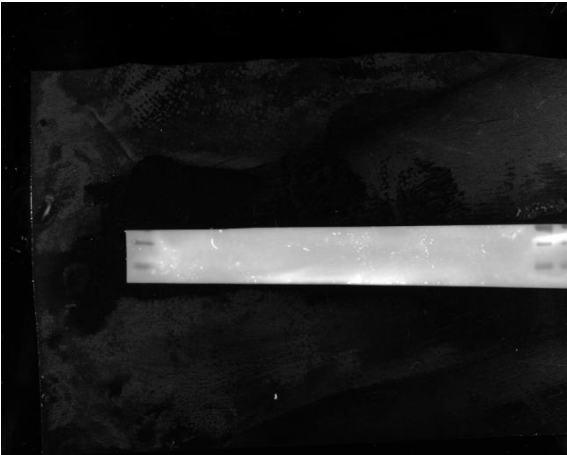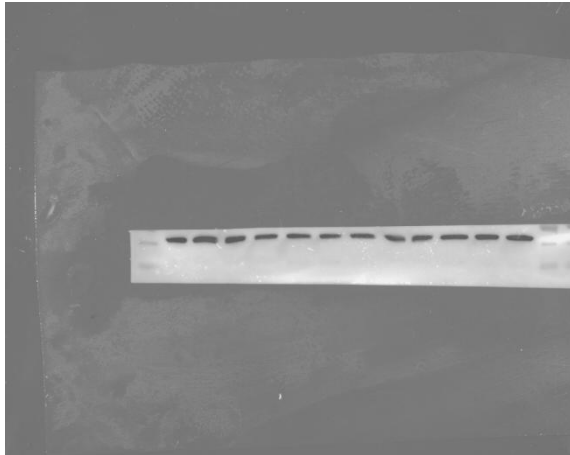

# Supplementary Figure 9



H

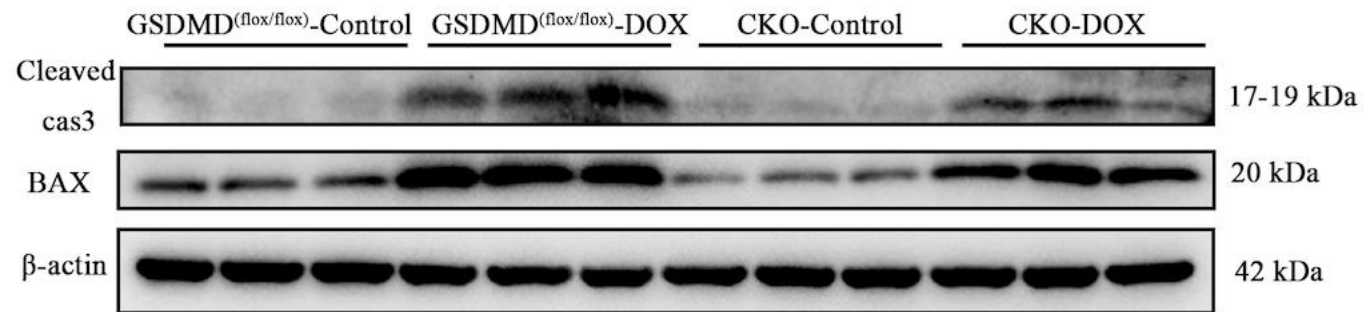

CC3

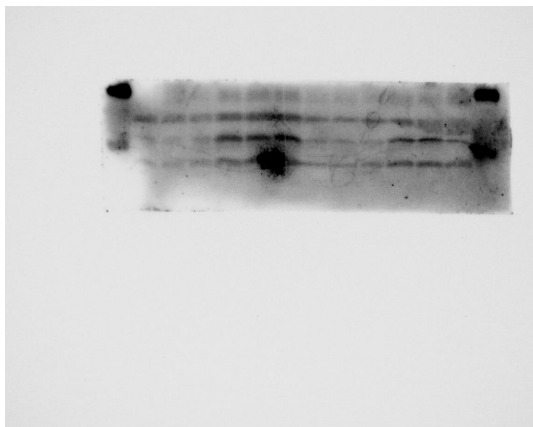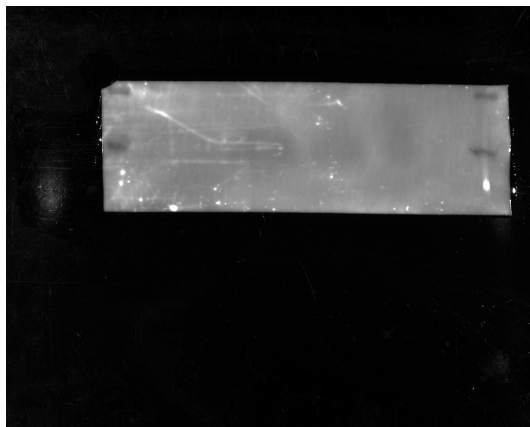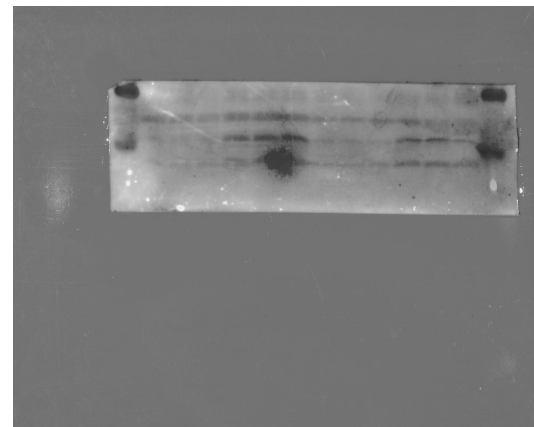

**BAX**

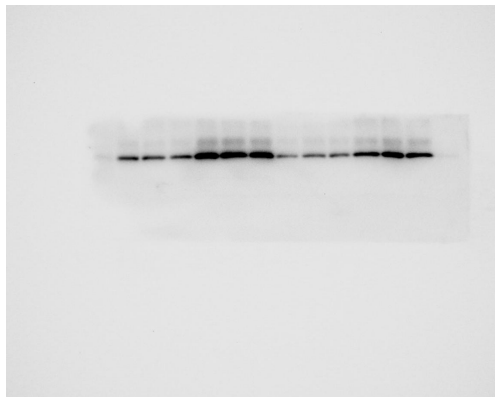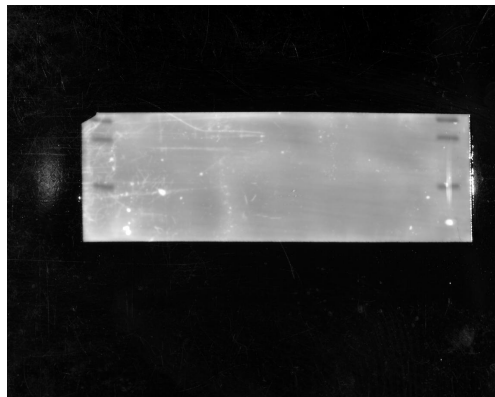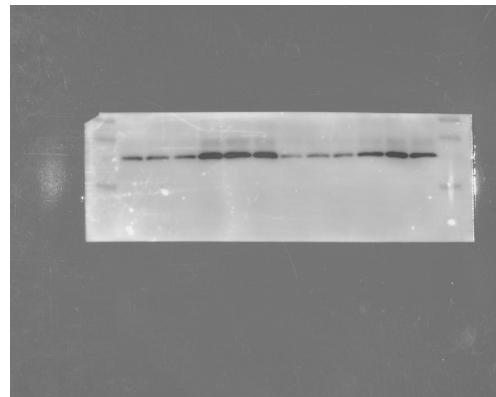

**$\beta$ -actin**

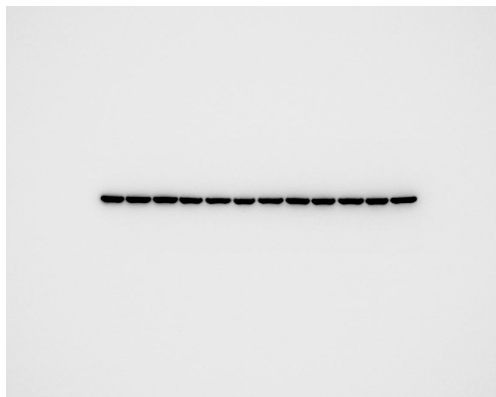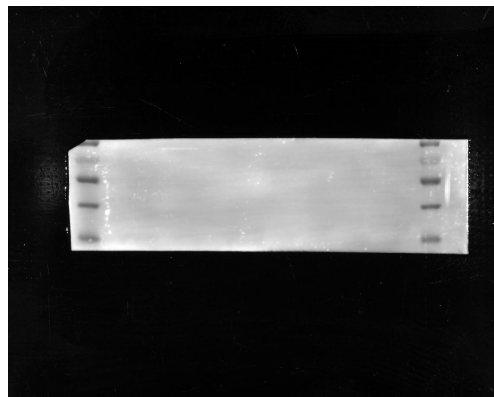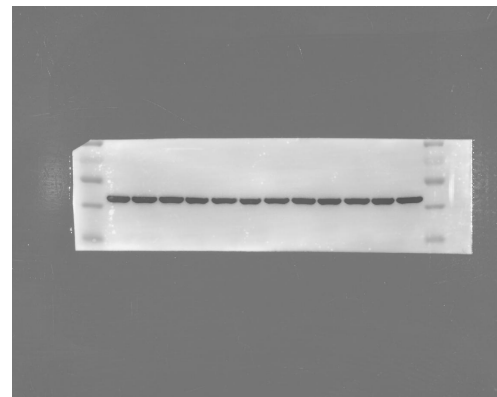

# Supplementary Figure 10

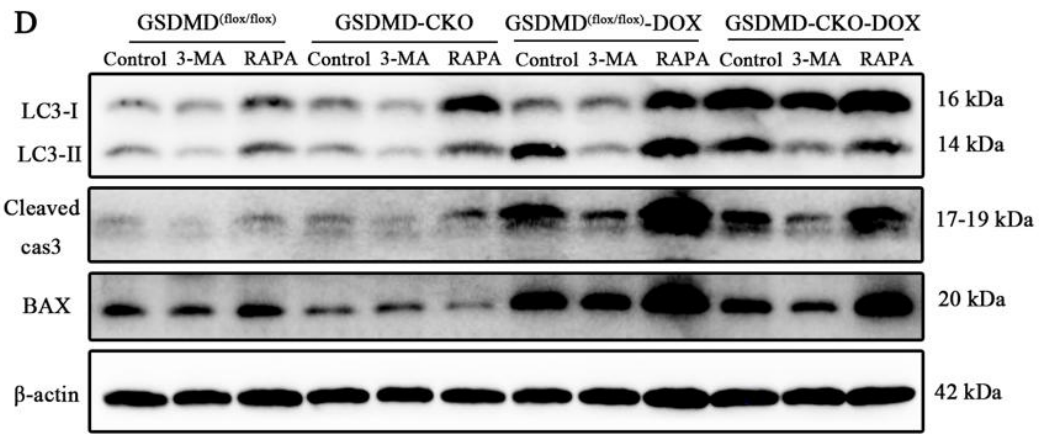

LC3

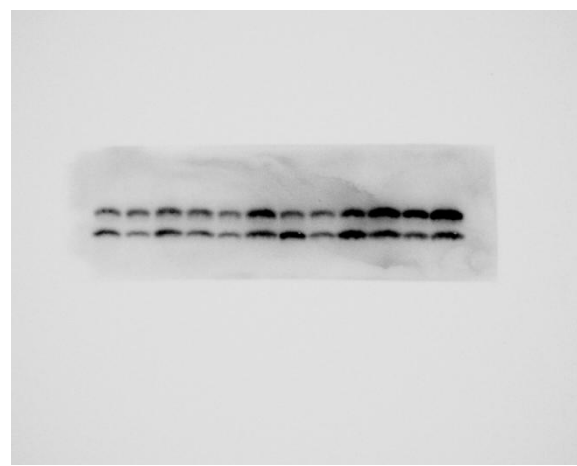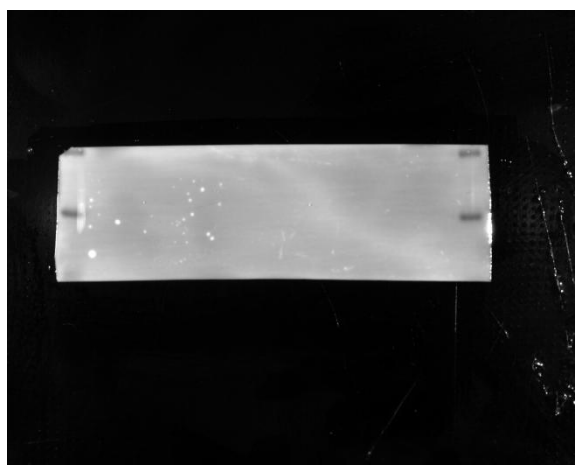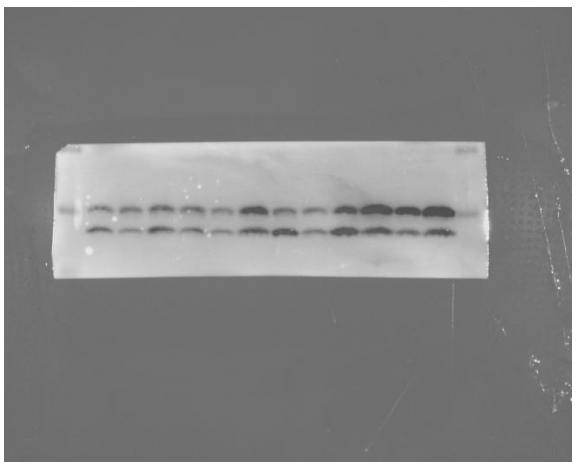

CC3

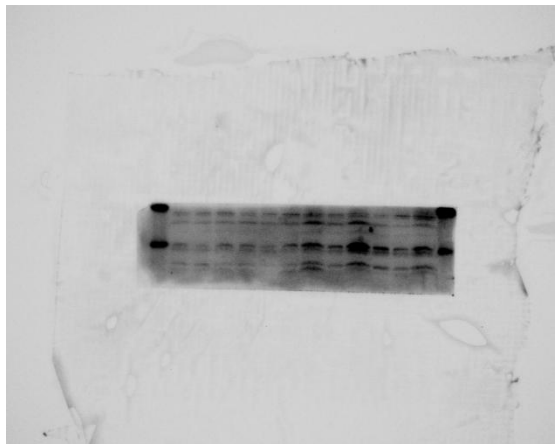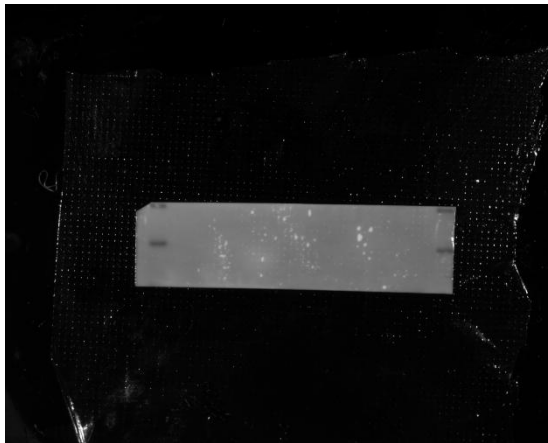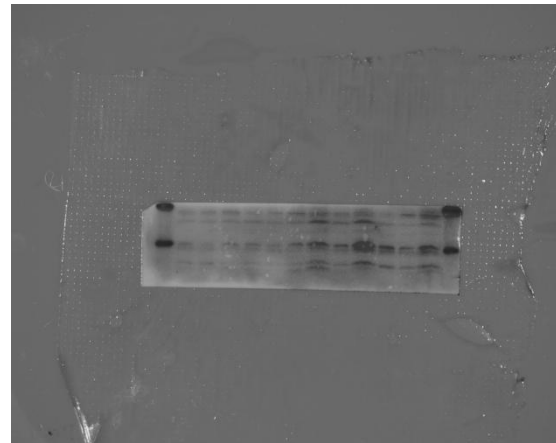

BAX

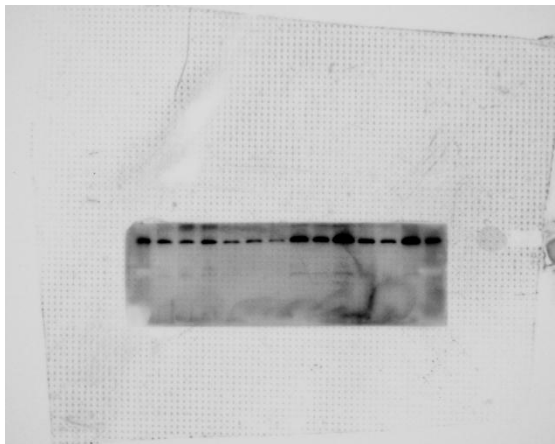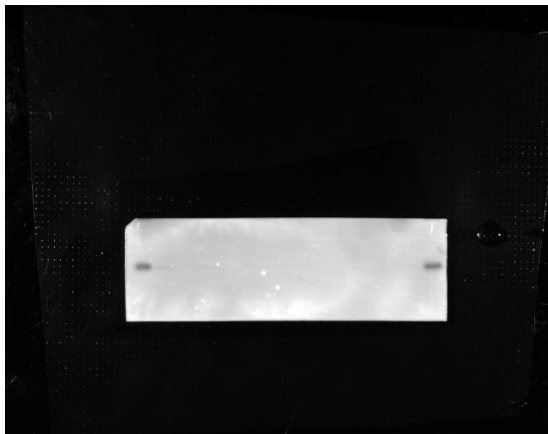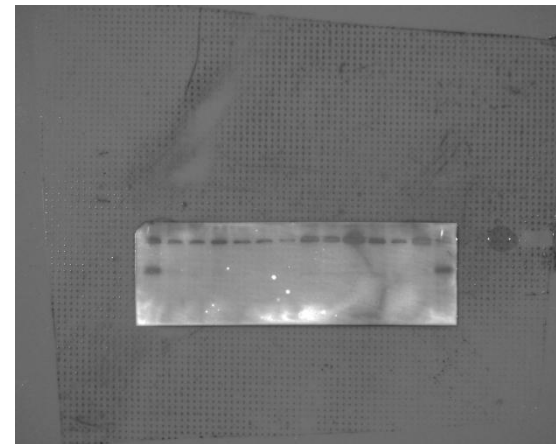

$\beta$ -actin

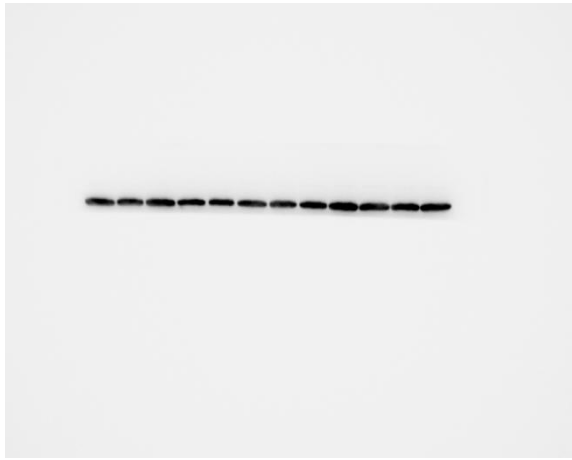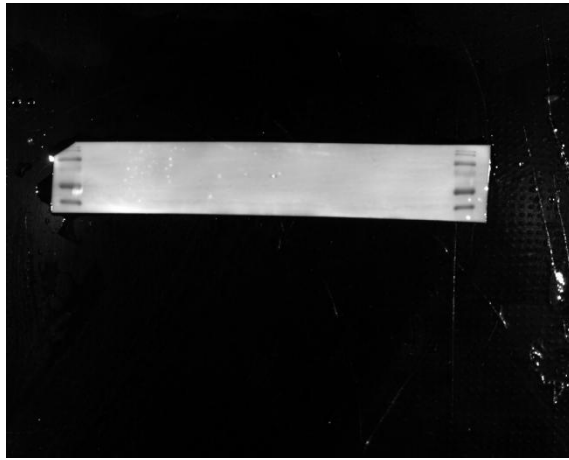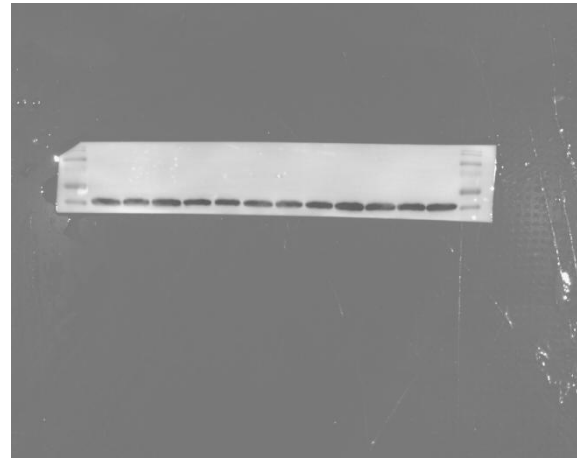

# Supplementary Figure 11

**A**

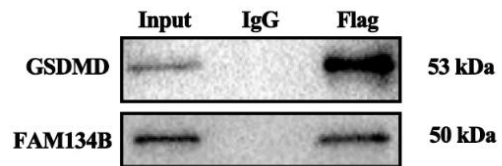

**GSDMD**

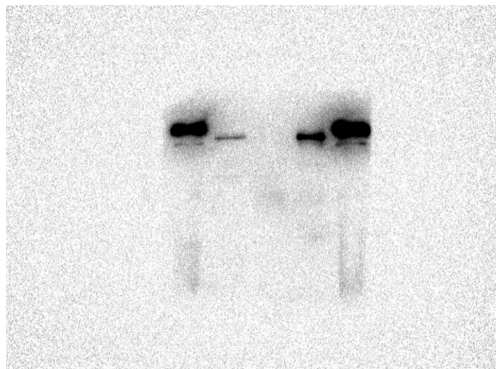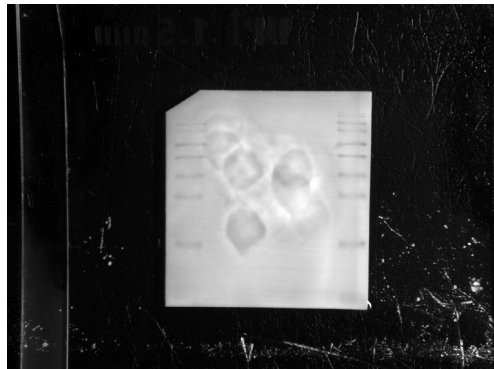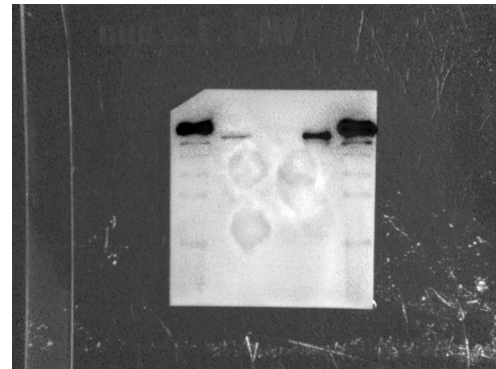

**FAM134B**

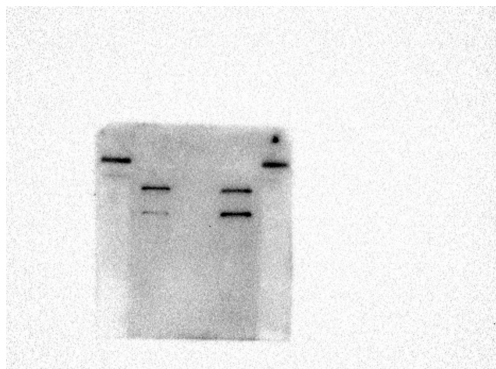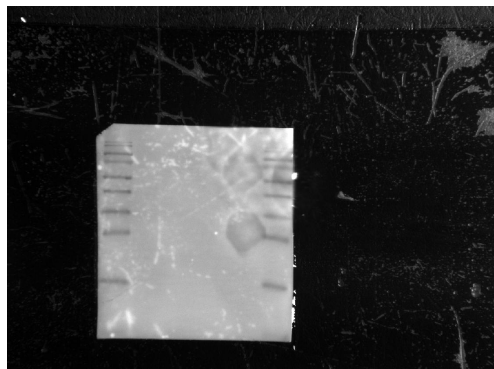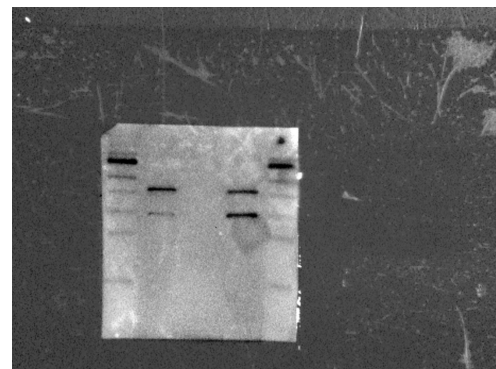



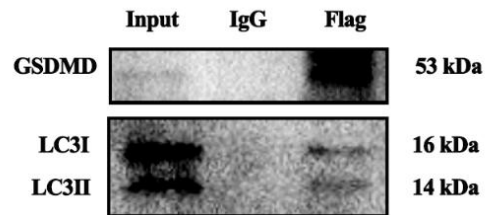

GSDMD

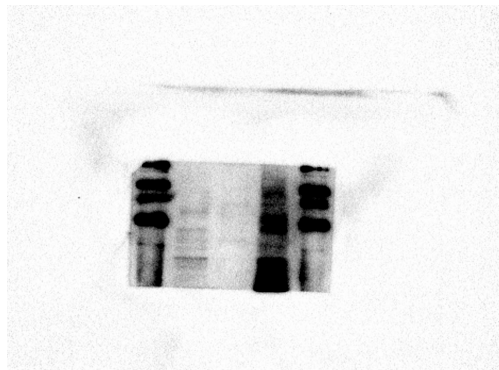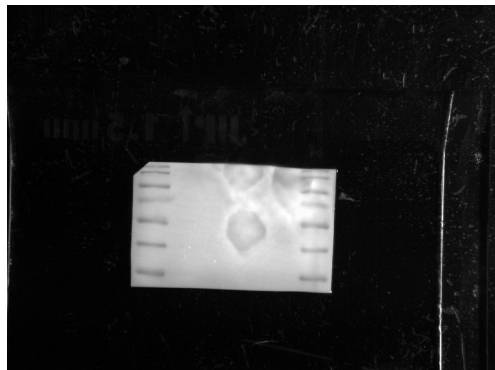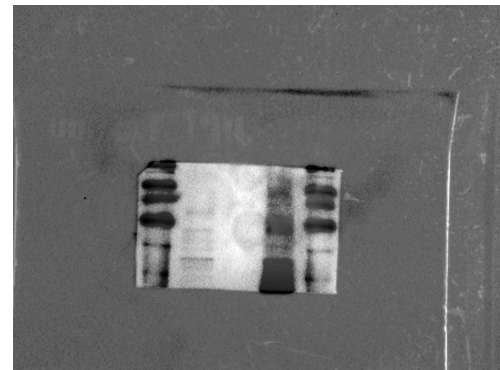

LC3

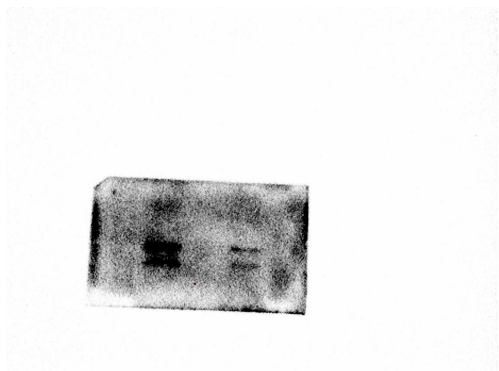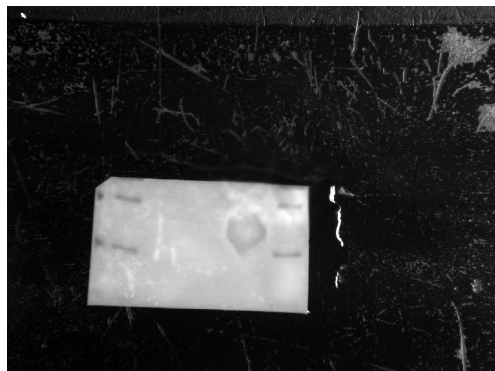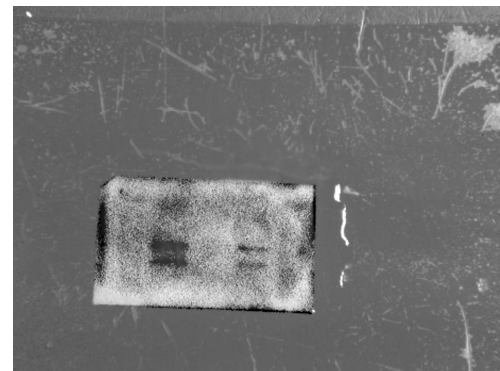

**B**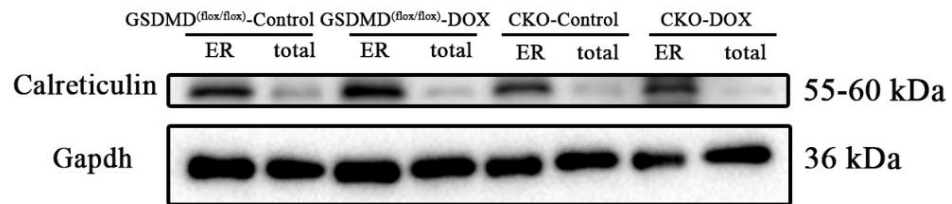**Calreticulin**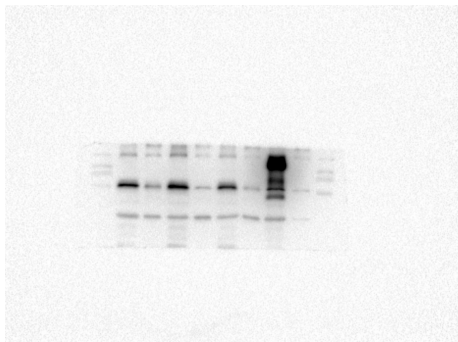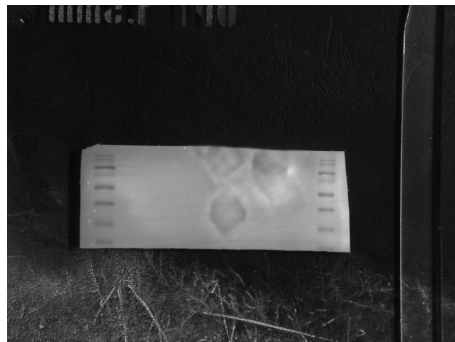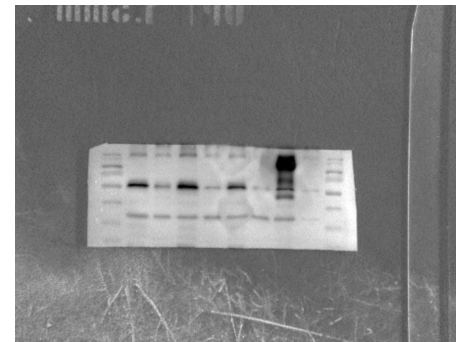**Gapdh**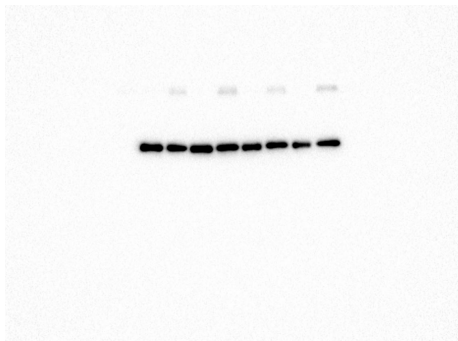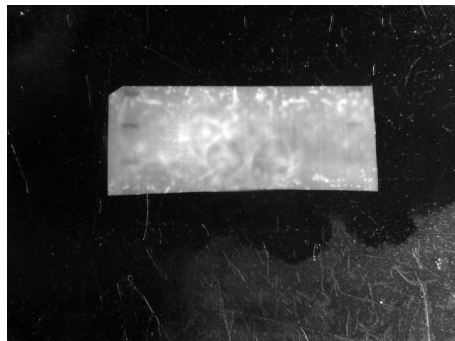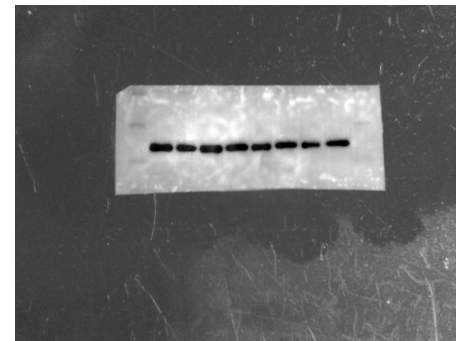

**C**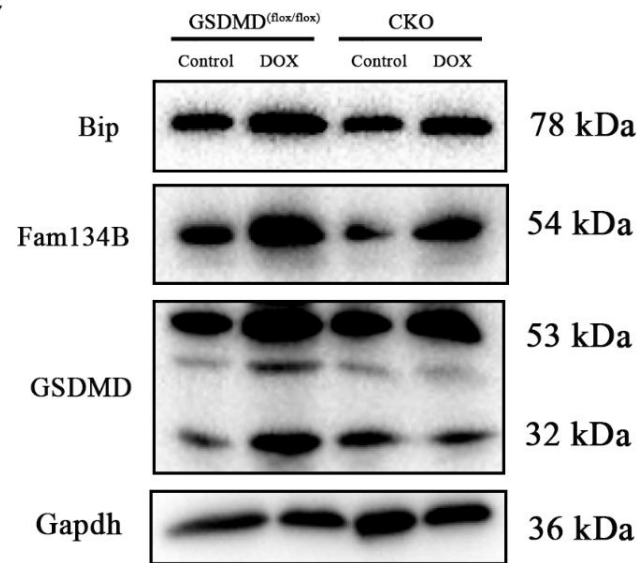**Bip**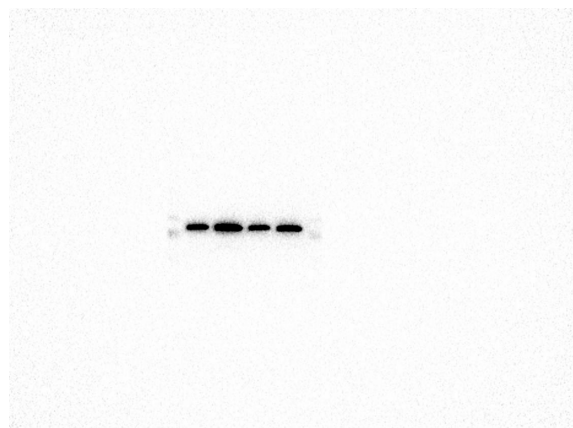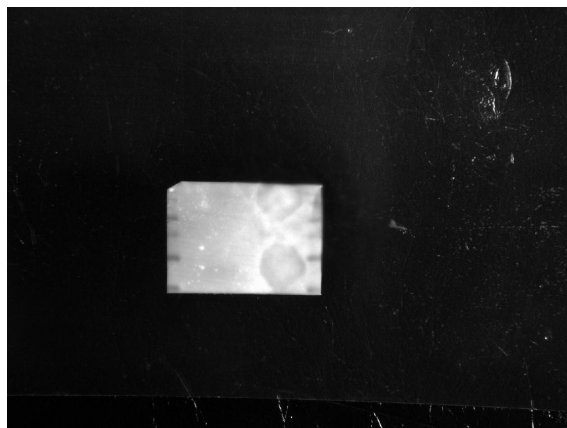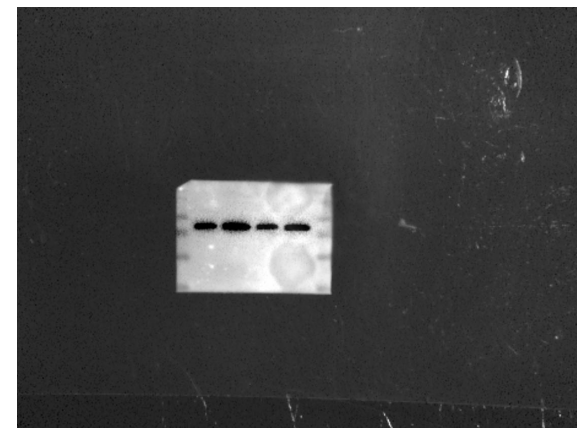

**FAM134B**

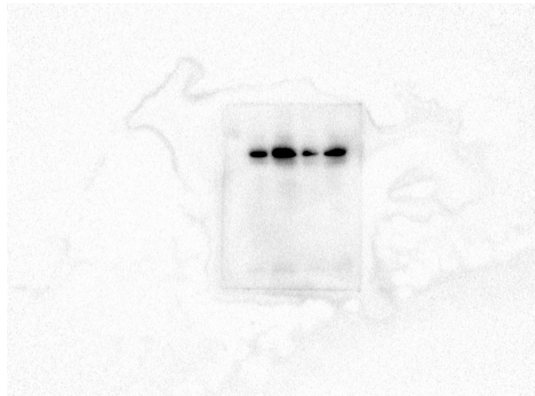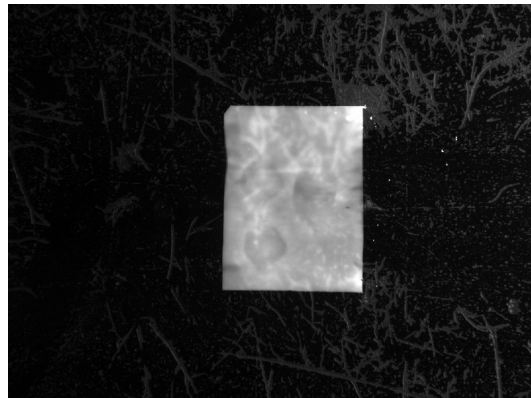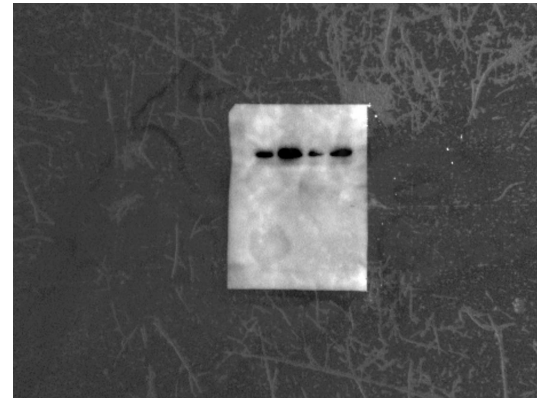

**GSDMD**

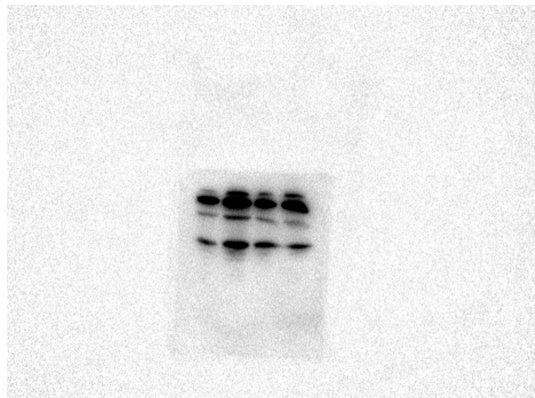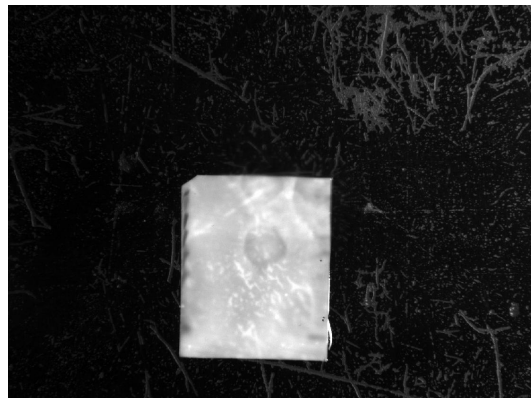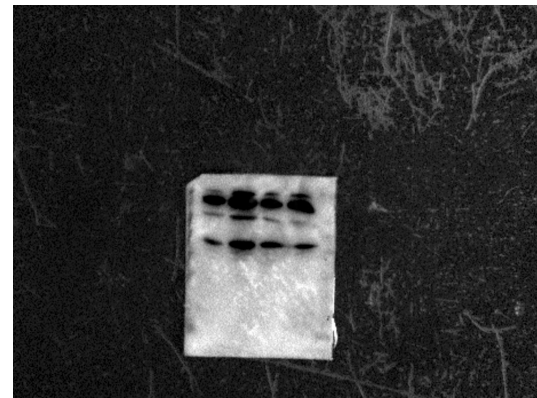

**Gapdh**

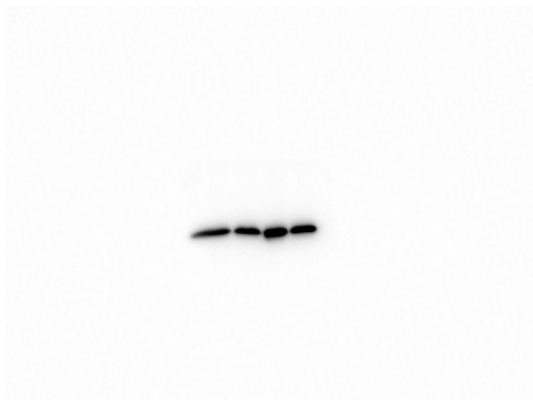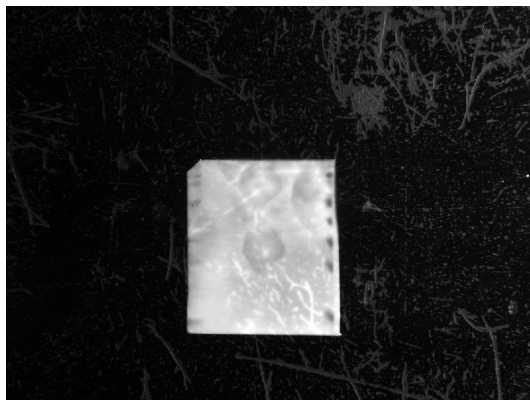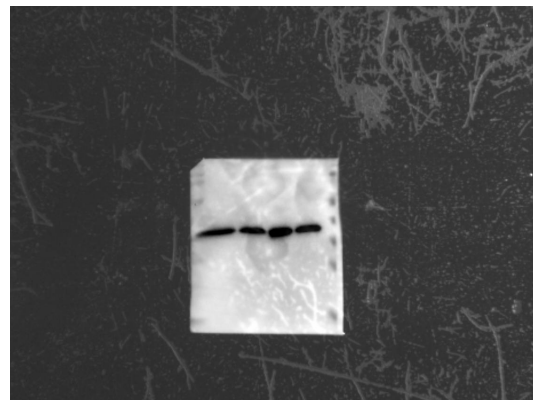

Supplement: 41419_2022_5333_MOESM1_ESM.pdf [file 41419_2022_5333_MOESM1_ESM.pdf]
